# Supplementary material for: Study protocol for the G-SPIRIT trial: a randomised, placebo-controlled, double-blinded phase III trial of granulocyte colony-stimulating factor-mediated neuroprotection for acute spinal cord injury
Source: PubMed Central journal article supplement — BMJ Open. 2018 May 5;8(5):e019083. doi: 10.1136/bmjopen-2017-019083 (PMC5942478; doi:10.1136/bmjopen-2017-019083), 2018-05-05
Supplement: bmjopen-2017-019083.draft_revisions.pdf [file bmjopen-2017-019083.draft_revisions.pdf]

# BMJ Open

BMJ Open is committed to open peer review. As part of this commitment we make the peer review history of every article we publish publicly available.

When an article is published we post the peer reviewers' comments and the authors' responses online. We also post the versions of the paper that were used during peer review. These are the versions that the peer review comments apply to.

The versions of the paper that follow are the versions that were submitted during the peer review process. They are not the versions of record or the final published versions. They should not be cited or distributed as the published version of this manuscript.

BMJ Open is an open access journal and the full, final, typeset and author-corrected version of record of the manuscript is available on our site with no access controls, subscription charges or pay-per-view fees (<http://bmjopen.bmj.com>).

If you have any questions on BMJ Open's open peer review process please email [info.bmjopen@bmj.com](mailto:info.bmjopen@bmj.com)

# BMJ Open

## Study Protocol for the G-SPIRIT trial: A Randomized, Placebo-Controlled, Double-blinded Phase 3 Trial of Granulocyte Colony Stimulating Factor-Mediated Neuroprotection for Acute Spinal Cord Injury

|                               |                                                                                                                                                                                                                                                                                                                                                                                                                                                                                                                                                                                                                                                                                                                                                                                                                                                                                                                                                                                                                                                                                                                                                                                                                                                                                                                                                                                                                                                                                                                                                                                                                                                                                                                                                                                                                                                                                                                                                                                                                                                                                                                                                                                                                                                                                                                                                                                                                                   |
|-------------------------------|-----------------------------------------------------------------------------------------------------------------------------------------------------------------------------------------------------------------------------------------------------------------------------------------------------------------------------------------------------------------------------------------------------------------------------------------------------------------------------------------------------------------------------------------------------------------------------------------------------------------------------------------------------------------------------------------------------------------------------------------------------------------------------------------------------------------------------------------------------------------------------------------------------------------------------------------------------------------------------------------------------------------------------------------------------------------------------------------------------------------------------------------------------------------------------------------------------------------------------------------------------------------------------------------------------------------------------------------------------------------------------------------------------------------------------------------------------------------------------------------------------------------------------------------------------------------------------------------------------------------------------------------------------------------------------------------------------------------------------------------------------------------------------------------------------------------------------------------------------------------------------------------------------------------------------------------------------------------------------------------------------------------------------------------------------------------------------------------------------------------------------------------------------------------------------------------------------------------------------------------------------------------------------------------------------------------------------------------------------------------------------------------------------------------------------------|
| Journal:                      | <i>BMJ Open</i>                                                                                                                                                                                                                                                                                                                                                                                                                                                                                                                                                                                                                                                                                                                                                                                                                                                                                                                                                                                                                                                                                                                                                                                                                                                                                                                                                                                                                                                                                                                                                                                                                                                                                                                                                                                                                                                                                                                                                                                                                                                                                                                                                                                                                                                                                                                                                                                                                   |
| Manuscript ID                 | bmjopen-2017-019083                                                                                                                                                                                                                                                                                                                                                                                                                                                                                                                                                                                                                                                                                                                                                                                                                                                                                                                                                                                                                                                                                                                                                                                                                                                                                                                                                                                                                                                                                                                                                                                                                                                                                                                                                                                                                                                                                                                                                                                                                                                                                                                                                                                                                                                                                                                                                                                                               |
| Article Type:                 | Protocol                                                                                                                                                                                                                                                                                                                                                                                                                                                                                                                                                                                                                                                                                                                                                                                                                                                                                                                                                                                                                                                                                                                                                                                                                                                                                                                                                                                                                                                                                                                                                                                                                                                                                                                                                                                                                                                                                                                                                                                                                                                                                                                                                                                                                                                                                                                                                                                                                          |
| Date Submitted by the Author: | 15-Aug-2017                                                                                                                                                                                                                                                                                                                                                                                                                                                                                                                                                                                                                                                                                                                                                                                                                                                                                                                                                                                                                                                                                                                                                                                                                                                                                                                                                                                                                                                                                                                                                                                                                                                                                                                                                                                                                                                                                                                                                                                                                                                                                                                                                                                                                                                                                                                                                                                                                       |
| Complete List of Authors:     | <p>Koda, Masao; G-SPIRIT Study Group; University of Tsukuba, Department of Orthopedic Surgery<br/> Hanaoka, Hideki; G-SPIRIT Study Group; Chiba University Hospital, Clinical Research Center<br/> Sato, Takatoshi; G-SPIRIT Study Group; Chiba University Hospital, Clinical Research Center<br/> Fujii, Yasuhisa; G-SPIRIT Study Group; Chiba University Hospital, Clinical Research Center<br/> Hanawa, Michiko; G-SPIRIT Study Group; Chiba University Hospital, Clinical Research Center<br/> Takahashi, Sho; G-SPIRIT Study Group; Chiba University Hospital, Clinical Research Center<br/> Furuya, Takeo; G-SPIRIT Study Group; Graduate School of Medicine, Chiba University, Department of Orthopaedic Surgery<br/> Ijima, Yasushi; G-SPIRIT Study Group; Graduate School of Medicine, Chiba University, Department of Orthopaedic Surgery<br/> Saito, Junya; G-SPIRIT Study Group; Graduate School of Medicine, Chiba University, Department of Orthopaedic Surgery<br/> Kitamura, Mitsuhiro; G-SPIRIT Study Group; Graduate School of Medicine, Chiba University, Department of Orthopaedic Surgery<br/> Ohtori, Seiji; G-SPIRIT Study Group; Graduate School of Medicine, Chiba University, Department of Orthopaedic Surgery<br/> Matsumoto, Yukei; G-SPIRIT Study Group; University of Tsukuba, Department of Orthopedic Surgery<br/> Abe, Tetsuya; G-SPIRIT Study Group; University of Tsukuba, Department of Orthopedic Surgery<br/> Watanabe, Kei; G-SPIRIT Study Group; Niigata University Graduate School of Medicine and Dental Sciences, Department of Orthopedic Surgery<br/> Hirano, Toru; G-SPIRIT Study Group; Niigata University Graduate School of Medicine and Dental Sciences, Department of Orthopedic Surgery<br/> Ohashi, Masayuki; G-SPIRIT Study Group; Niigata University Graduate School of Medicine and Dental Sciences, Department of Orthopedic Surgery<br/> Shoji, Hirokazu; G-SPIRIT Study Group; Niigata University Graduate School of Medicine and Dental Sciences, Department of Orthopedic Surgery<br/> Mizouchi, Tatsuki; G-SPIRIT Study Group; Niigata University Graduate School of Medicine and Dental Sciences, Department of Orthopedic Surgery<br/> Takahashi, Ikuko; G-SPIRIT Study Group; Niigata University Graduate School of Medicine and Dental Sciences, Department of Orthopedic Surgery<br/> Kawahara, Norio; G-SPIRIT Study Group; Kanazawa Medical University,</p> |

|    |                                                                         |
|----|-------------------------------------------------------------------------|
| 1  |                                                                         |
| 2  |                                                                         |
| 3  |                                                                         |
| 4  | Orthopaedic Surgery                                                     |
| 5  | Kawaguchi, Masahito; G-SPIRIT Study Group; Kanazawa Medical             |
| 6  | University, Orthopaedic Surgery                                         |
| 7  | Orita, Yugo; G-SPIRIT Study Group; Kanazawa Medical University,         |
| 8  | Orthopaedic Surgery                                                     |
| 9  | Sasamoto, Takeshi; G-SPIRIT Study Group; Kanazawa Medical University,   |
| 10 | Orthopaedic Surgery                                                     |
| 11 | Yoshioka, Masahito; G-SPIRIT Study Group; Kanazawa Medical University,  |
| 12 | Orthopaedic Surgery                                                     |
| 13 | Fujii, Masafumi; G-SPIRIT Study Group; Kanazawa Medical University,     |
| 14 | Orthopaedic Surgery                                                     |
| 15 | Yonezawa, Katsutaka; G-SPIRIT Study Group; Kanazawa Medical             |
| 16 | University, Orthopaedic Surgery                                         |
| 17 | Soma, Daisuke; G-SPIRIT Study Group; Kanazawa Medical University,       |
| 18 | Orthopaedic Surgery                                                     |
| 19 | Taneichi, Hiroshi; G-SPIRIT Study Group; Dokkyo Ika Daigaku, Department |
| 20 | of Orthopedic Surgery                                                   |
| 21 | Takeuchi, Daisaku; G-SPIRIT Study Group; Dokkyo Ika Daigaku,            |
| 22 | Department of Orthopedic Surgery                                        |
| 23 | Inami, Satoshi; G-SPIRIT Study Group; Dokkyo Ika Daigaku, Department    |
| 24 | of Orthopedic Surgery                                                   |
| 25 | Moridaira, Hiroshi; G-SPIRIT Study Group; Dokkyo Ika Daigaku,           |
| 26 | Department of Orthopedic Surgery                                        |
| 27 | Ueda, Haruki; G-SPIRIT Study Group; Dokkyo Ika Daigaku, Department of   |
| 28 | Orthopedic Surgery                                                      |
| 29 | Asano, Futoshi; G-SPIRIT Study Group; Dokkyo Ika Daigaku, Department    |
| 30 | of Orthopedic Surgery                                                   |
| 31 | Shibao, Yosuke; G-SPIRIT Study Group; Dokkyo Ika Daigaku, Department    |
| 32 | of Orthopedic Surgery                                                   |
| 33 | Aita, Ikuo; G-SPIRIT Study Group; Tsukuba Medical Center Byoin,         |
| 34 | Department of Orthopedic Surgery                                        |
| 35 | Takeuchi, Yosuke; G-SPIRIT Study Group; Tsukuba Medical Center Byoin,   |
| 36 | Department of Orthopedic Surgery                                        |
| 37 | Mimura, Masaya; G-SPIRIT Study Group; Funabashi Shiritsu Iryo Center,   |
| 38 | Department of Orthopedic Surgery                                        |
| 39 | Shimbo, Jun; G-SPIRIT Study Group; Funabashi Shiritsu Iryo Center,      |
| 40 | Department of Orthopedic Surgery                                        |
| 41 | Someya, Yukio; G-SPIRIT Study Group; Funabashi Shiritsu Iryo Center,    |
| 42 | Department of Orthopedic Surgery                                        |
| 43 | Ikenoue, Sumio; G-SPIRIT Study Group; Funabashi Shiritsu Iryo Center,   |
| 44 | Department of Orthopedic Surgery                                        |
| 45 | Sameda, Hiroaki; G-SPIRIT Study Group; Funabashi Shiritsu Iryo Center,  |
| 46 | Department of Orthopedic Surgery                                        |
| 47 | Takase, Kan; G-SPIRIT Study Group; Funabashi Shiritsu Iryo Center,      |
| 48 | Department of Orthopedic Surgery                                        |
| 49 | Ikeda, Yoshikazu; G-SPIRIT Study Group; Chiba Rosai Byoin, Department   |
| 50 | of Orthopedic Surgery                                                   |
| 51 | Nakajima, Fumitake; G-SPIRIT Study Group; Chiba Rosai Byoin,            |
| 52 | Department of Orthopedic Surgery                                        |
| 53 | Hashimoto, Mitsuhiro; G-SPIRIT Study Group; Chiba Rosai Byoin,          |
| 54 | Department of Orthopedic Surgery                                        |
| 55 | Ozawa, Tomoyuki; G-SPIRIT Study Group; Chiba Rosai Byoin, Department    |
| 56 | of Orthopedic Surgery                                                   |
| 57 | Hasue, Fumio; G-SPIRIT Study Group; Kimitsu Chuo Byoin, Department of   |
| 58 | Orthopedic Surgery                                                      |
| 59 | Fujiyoshi, Takayuki; G-SPIRIT Study Group; Kimitsu Chuo Byoin,          |
| 60 | Department of Orthopedic Surgery                                        |
|    | Kamiya, Koshiro; G-SPIRIT Study Group; Kimitsu Chuo Byoin, Department   |
|    | of Orthopedic Surgery                                                   |
|    | Watanabe, Masahiko; G-SPIRIT Study Group; Tokai Daigaku Igakubu         |
|    | Seikei Gekagaku, Department of Orthopedic Surgery                       |

|    |                                                                          |
|----|--------------------------------------------------------------------------|
| 1  |                                                                          |
| 2  |                                                                          |
| 3  |                                                                          |
| 4  | Katoh, Hiroyuki; G-SPIRIT Study Group; Tokai Daigaku - Isehara Campus,   |
| 5  | Department of Orthopedic Surgery                                         |
| 6  | Matsuyama, Yukihiro; G-SPIRIT Study Group; Hamamatsu Ika Daigaku,        |
| 7  | Department of Orthopedic Surgery                                         |
| 8  | Yamato, Yu; G-SPIRIT Study Group; Hamamatsu Ika Daigaku, Department      |
| 9  | of Orthopedic Surgery                                                    |
| 10 | Togawa, Daisuke; G-SPIRIT Study Group; Hamamatsu Ika Daigaku,            |
| 11 | Department of Orthopedic Surgery                                         |
| 12 | Hasegawa, Tomohiko; G-SPIRIT Study Group; Hamamatsu Ika Daigaku,         |
| 13 | Department of Orthopedic Surgery                                         |
| 14 | Kobayashi, Sho; G-SPIRIT Study Group; Hamamatsu Ika Daigaku,             |
| 15 | Department of Orthopedic Surgery                                         |
| 16 | Yoshida, Go; G-SPIRIT Study Group; Hamamatsu Ika Daigaku, Department     |
| 17 | of Orthopedic Surgery                                                    |
| 18 | Oe, Shin; G-SPIRIT Study Group; Hamamatsu Ika Daigaku, Department of     |
| 19 | Orthopedic Surgery                                                       |
| 20 | Banno, Tomohiro; G-SPIRIT Study Group; Hamamatsu Ika Daigaku,            |
| 21 | Department of Orthopedic Surgery                                         |
| 22 | Arima, Hideyuki; G-SPIRIT Study Group; Hamamatsu Ika Daigaku,            |
| 23 | Department of Orthopedic Surgery                                         |
| 24 | Akeda, Koji; G-SPIRIT Study Group; Mie Daigaku Daigakuin Igakukei        |
| 25 | Kenkyuka Igakubu, Department of Orthopedic Surgery                       |
| 26 | Kawamoto, Eiji; G-SPIRIT Study Group; Mie Daigaku Daigakuin Igakukei     |
| 27 | Kenkyuka Igakubu, Department of Orthopedic Surgery                       |
| 28 | Imai, Hiroshi; G-SPIRIT Study Group; Mie Daigaku Daigakuin Igakukei      |
| 29 | Kenkyuka Igakubu, Department of Orthopedic Surgery                       |
| 30 | Sakakibara, Toshihiko; G-SPIRIT Study Group; Mie Daigaku Daigakuin       |
| 31 | Igakukei Kenkyuka Igakubu, Department of Orthopedic Surgery              |
| 32 | Sudo, Akihiro ; G-SPIRIT Study Group; Mie Daigaku Daigakuin Igakukei     |
| 33 | Kenkyuka Igakubu, Department of Orthopedic Surgery                       |
| 34 | Ito, Yasuo; G-SPIRIT Study Group; Kobe Sekijuji Byoin, Department of     |
| 35 | Orthopedic Surgery                                                       |
| 36 | Kikuchi, Tsuyoshi; G-SPIRIT Study Group; Kobe Sekijuji Byoin, Department |
| 37 | of Orthopedic Surgery                                                    |
| 38 | Osaki, Shuhei; G-SPIRIT Study Group; Kobe Sekijuji Byoin, Department of  |
| 39 | Orthopedic Surgery                                                       |
| 40 | Tanaka, Nobuhiro; G-SPIRIT Study Group; Hiroshima Daigaku Igakubu        |
| 41 | Daigakuin Ishiyaku Hokengaku Kenkyuka, Department of Orthopedic          |
| 42 | Surgery                                                                  |
| 43 | Nakanishi, Kazuyoshi; G-SPIRIT Study Group; Hiroshima Daigaku Igakubu    |
| 44 | Daigakuin Ishiyaku Hokengaku Kenkyuka, Department of Orthopedic          |
| 45 | Surgery                                                                  |
| 46 | Kamei, Naosuke; G-SPIRIT Study Group; Hiroshima Daigaku Igakubu          |
| 47 | Daigakuin Ishiyaku Hokengaku Kenkyuka, Department of Orthopedic          |
| 48 | Surgery                                                                  |
| 49 | Kotaka, Shinji; G-SPIRIT Study Group; Hiroshima Daigaku Igakubu          |
| 50 | Daigakuin Ishiyaku Hokengaku Kenkyuka, Department of Orthopedic          |
| 51 | Surgery                                                                  |
| 52 | Baba, Hideo; G-SPIRIT Study Group; Nagasaki Rosai Byoin, Department of   |
| 53 | Orthopedic Surgery                                                       |
| 54 | Okudaira, Tsuyoshi; G-SPIRIT Study Group; Nagasaki Rosai Byoin,          |
| 55 | Department of Orthopedic Surgery                                         |
| 56 | Hiroaki, Konishi; G-SPIRIT Study Group; Nagasaki Rosai Byoin,            |
| 57 | Department of Orthopedic Surgery                                         |
| 58 | Yamaguchi, Takayuki; G-SPIRIT Study Group; Nagasaki Rosai Byoin,         |
| 59 | Department of Orthopedic Surgery                                         |
| 60 | Ito, Keigo; G-SPIRIT Study Group; Chubu Rosai Byoin, Department of       |
|    | Orthopedic Surgery                                                       |
|    | Katayama, Yoshito; G-SPIRIT Study Group; Chubu Rosai Byoin,              |
|    | Department of Orthopedic Surgery                                         |
|    | Matsumoto, Taro; G-SPIRIT Study Group; Chubu Rosai Byoin, Department     |

|           |                                                                                                                                                                                                                                                                                                                                                                                                                                                                                                                                                                                                                                                                                                                                                                                                                                                                                                                                                                                                                                                                                                                                                                                                                                                                                                                                                                                                                                                                                                                                                                                                                                                                                                                                                                                                                                                                                                                                                                                                                                                                                                                                                                                                                                                                                                                                                                                                               |
|-----------|---------------------------------------------------------------------------------------------------------------------------------------------------------------------------------------------------------------------------------------------------------------------------------------------------------------------------------------------------------------------------------------------------------------------------------------------------------------------------------------------------------------------------------------------------------------------------------------------------------------------------------------------------------------------------------------------------------------------------------------------------------------------------------------------------------------------------------------------------------------------------------------------------------------------------------------------------------------------------------------------------------------------------------------------------------------------------------------------------------------------------------------------------------------------------------------------------------------------------------------------------------------------------------------------------------------------------------------------------------------------------------------------------------------------------------------------------------------------------------------------------------------------------------------------------------------------------------------------------------------------------------------------------------------------------------------------------------------------------------------------------------------------------------------------------------------------------------------------------------------------------------------------------------------------------------------------------------------------------------------------------------------------------------------------------------------------------------------------------------------------------------------------------------------------------------------------------------------------------------------------------------------------------------------------------------------------------------------------------------------------------------------------------------------|
|           | <p>of Orthopedic Surgery<br/>         Matsumoto, Tomohiro; G-SPIRIT Study Group; Chubu Rosai Byoin, Department of Orthopedic Surgery<br/>         Idota, Masaru; G-SPIRIT Study Group; Chubu Rosai Byoin, Department of Orthopedic Surgery<br/>         Kanno, Haruo; G-SPIRIT Study Group; Tohoku University School of Medicine, Department of Orthopedic Surgery<br/>         Aizawa, Toshimi; G-SPIRIT Study Group; Tohoku University School of Medicine, Department of Orthopedic Surgery<br/>         Hashimoto, Ko; G-SPIRIT Study Group; Tohoku University School of Medicine, Department of Orthopedic Surgery<br/>         Eto, Toshimitsu; G-SPIRIT Study Group; Tohoku University School of Medicine, Department of Orthopedic Surgery<br/>         Sugaya, Takehiro; G-SPIRIT Study Group; Tohoku University School of Medicine, Department of Orthopedic Surgery<br/>         Matsuda, Michiharu; G-SPIRIT Study Group; Tohoku University School of Medicine, Department of Orthopedic Surgery<br/>         Fushimi, Kazunari; G-SPIRIT Study Group; Gifu Daigaku Igakubu Daigakuin Igaku Kenkyuka Seikei Gekagaku, Department of Orthopedic Surgery<br/>         Nozawa, Satoshi; G-SPIRIT Study Group; Gifu Daigaku Igakubu Daigakuin Igaku Kenkyuka Seikei Gekagaku, Department of Orthopedic Surgery<br/>         Iwai, Chizuo; G-SPIRIT Study Group; Gifu Daigaku Igakubu Daigakuin Igaku Kenkyuka Seikei Gekagaku, Department of Orthopedic Surgery<br/>         Taguchi, Toshihiko; G-SPIRIT Study Group; Yamaguchi Daigaku Igakubu Daigakuin Igakukei Kenkyuka Seikei Gekagaku, Department of Orthopedic Surgery<br/>         Kanchiku, Tsukasa; G-SPIRIT Study Group; Yamaguchi Daigaku Igakubu Daigakuin Igakukei Kenkyuka Seikei Gekagaku, Department of Orthopedic Surgery<br/>         Suzuki, Hidenori; G-SPIRIT Study Group; Yamaguchi Daigaku Igakubu Daigakuin Igakukei Kenkyuka Seikei Gekagaku, Department of Orthopedic Surgery<br/>         Nishida, Norihiro; G-SPIRIT Study Group; Yamaguchi Daigaku Igakubu Daigakuin Igakukei Kenkyuka Seikei Gekagaku, Department of Orthopedic Surgery<br/>         Funaba, Masahiro; G-SPIRIT Study Group; Yamaguchi Daigaku Igakubu Daigakuin Igakukei Kenkyuka Seikei Gekagaku, Department of Orthopedic Surgery<br/>         Yamazaki, Masashi; G-SPIRIT Study Group; University of Tsukuba, Department of Orthopedic Surgery</p> |
| Keywords: | Neurological injury < NEUROLOGY, Spine < ORTHOPAEDIC & TRAUMA SURGERY, Clinical trials < THERAPEUTICS                                                                                                                                                                                                                                                                                                                                                                                                                                                                                                                                                                                                                                                                                                                                                                                                                                                                                                                                                                                                                                                                                                                                                                                                                                                                                                                                                                                                                                                                                                                                                                                                                                                                                                                                                                                                                                                                                                                                                                                                                                                                                                                                                                                                                                                                                                         |

SCHOLARONE™  
 Manuscripts

1  
2  
3  
4  
5  
6  
7  
8  
9  
10  
11  
12  
13  
14  
15  
16  
17  
18  
19  
20  
21  
22  
23  
24  
25  
26  
27  
28  
29  
30  
31  
32  
33  
34  
35  
36  
37  
38  
39  
40  
41  
42  
43  
44  
45  
46  
47  
48  
49  
50  
51  
52  
53  
54  
55  
56  
57  
58  
59  
60

## Study Protocol for the G-SPIRIT trial: A Randomized, Placebo-Controlled, Double-blinded Phase 3 Trial of Granulocyte Colony Stimulating Factor-Mediated Neuroprotection for Acute Spinal Cord Injury

Corresponding Author: Masao Koda

1-1-1 Tennodai, Tsukuba City, Ibaraki 3058575, Japan

e-mail: [masaokod@gmail.com](mailto:masaokod@gmail.com), tel: 81-29-853-3219

Authors: Masao Koda<sup>1,2</sup>, Hideki Hanaoka<sup>1,3</sup>, Takatoshi Sato<sup>1,3</sup>, Yasuhisa Fujii<sup>1,3</sup>, Michiko Hanawa<sup>1,3</sup>, Sho Takahashi<sup>1,3</sup>, Takeo Furuya<sup>1,4</sup>, Yasushi Ijima<sup>1,4</sup>, Junya Saito<sup>1,4</sup>, Mitsuhiro Kitamura<sup>1,4</sup>, Seiji Ohtori<sup>1,4</sup>, Yukei Matsumoto<sup>1,2</sup>, Tetsuya Abe<sup>1,2</sup>, Kei Watanabe<sup>1,5</sup>, Toru Hirano<sup>1,5</sup>, Masayuki Ohashi<sup>1,5</sup>, Hirokazu Shoji<sup>1,5</sup>, Tatsuki Mizouchi<sup>1,5</sup>, Ikuko Takahashi<sup>1,5</sup>, Norio Kawahara<sup>1,6</sup>, Masahito Kawaguchi<sup>1,6</sup>, Yugo Orita<sup>1,6</sup>, Takeshi Sasamoto<sup>1,6</sup>, Masahito Yoshioka<sup>1,6</sup>, Masafumi Fujii<sup>1,6</sup>, Katsutaka Yonezawa<sup>1,6</sup>, Daisuke Soma<sup>1,6</sup>, Hiroshi Taneichi<sup>1,7</sup>, Daisaku Takeuchi<sup>1,7</sup>, Satoshi Inami<sup>1,7</sup>, Hiroshi Moridaira<sup>1,7</sup>, Haruki Ueda<sup>1,7</sup>, Futoshi Asano<sup>1,7</sup>, Yosuke Shibao<sup>1,7</sup>, Ikuo Aita<sup>1,8</sup>, Yosuke Takeuchi<sup>1,8</sup>, Masaya Mimura<sup>1,9</sup>, Jun Shimbo<sup>1,9</sup>, Yukio Someya<sup>1,9</sup>, Sumio Ikenoue<sup>1,9</sup>, Hiroaki Sameda<sup>1,9</sup>, Kan Takase<sup>1,9</sup>, Yoshikazu Ikeda<sup>1,10</sup>, Fumitake Nakajima<sup>1,10</sup>, Mitsuhiro Hashimoto<sup>1,10</sup>, Tomoyuki Ozawa<sup>1,10</sup>, Fumio Hasue<sup>1,11</sup>, Takayuki Fujiyoshi<sup>1,11</sup>, Koshiro Kamiya<sup>1,11</sup>, Masahiko Watanabe<sup>1,12</sup>, Hiroyuki Katoh<sup>1,12</sup>, Yukihiro Matsuyama<sup>1,13</sup>, Yu Yamamoto<sup>1,13</sup>, Daisuke Togawa<sup>1,13</sup>, Tomohiko Hasegawa<sup>1,13</sup>, Sho Kobayashi<sup>1,13</sup>, Go Yoshida<sup>1,13</sup>, Shin Oe<sup>1,13</sup>, Tomohiro Banno<sup>1,13</sup>, Hideyuki Arima<sup>1,13</sup>, Koji Akeda<sup>1,14</sup>, Eiji Kawamoto<sup>1,14</sup>, Hiroshi Imai<sup>1,14</sup>, Toshihiko Sakakibara<sup>1,14</sup>, Akihiro Sudo<sup>1,14</sup>, Yasuo Ito<sup>1,15</sup>, Tsuyoshi Kikuchi<sup>1,15</sup>, Shuhei Osaki<sup>1,15</sup>, Nobuhiro Tanaka<sup>1,16</sup>, Kazuyoshi Nakanishi<sup>1,16</sup>, Naosuke Kamei<sup>1,16</sup>, Shinji Kotaka<sup>1,16</sup>, Hideo Baba<sup>1,17</sup>, Tsuyoshi Okudaira<sup>1,17</sup>, Hiroaki Konishi<sup>1,17</sup>, Takayuki Yamaguchi<sup>1,17</sup>, Keigo Ito<sup>1,18</sup>, Yoshito Katayama<sup>1,18</sup>, Taro Matsumoto<sup>1,18</sup>, Tomohiro Matsumoto<sup>1,18</sup>, Masaru Idota<sup>1,18</sup>, Haruo Kanno<sup>1,19</sup>, Toshimi Aizawa<sup>1,19</sup>, Ko Hashimoto<sup>1,19</sup>, Toshimitsu Eto<sup>1,19</sup>, Takehiro Sugaya<sup>1,19</sup>, Michiharu Matsuda<sup>1,19</sup>, Kazunari Fushimi<sup>1,20</sup>, Satoshi Nozawa<sup>1,20</sup>, Chizuo Iwai<sup>1,20</sup>, Toshihiko Taguchi<sup>1,21</sup>, Tsukasa Kanchiku<sup>1,21</sup>, Hidenori Suzuki<sup>1,21</sup>, Norihiro Nishida<sup>1,21</sup>, Masahiro Funaba<sup>1,21</sup>, Masashi Yamazaki<sup>1,2</sup>

1  
2  
3  
4  
5 Affiliations  
6

7 <sup>1</sup>G-SPIRIT Study Group is consisted by Nineteen major hospitals in Japan constituting the  
8 G-SPIRIT study group  
9

10 <sup>2</sup>Department of Orthopedic Surgery, University of Tsukuba, Ibaraki

11 <sup>3</sup>Clinical Research Center, Chiba University Hospital, Chiba  
12

13 <sup>4</sup>Department of Orthopedic Surgery, Chiba University Graduate School of Medicine, Chiba  
14

15 <sup>5</sup>Department of Orthopedic Surgery, Niigata University Graduate School of Medicine and  
16 Dental Sciences, Niigata  
17

18 <sup>6</sup>Department of Orthopedic Surgery, Kanazawa Medical University, Ishikawa  
19

20 <sup>7</sup>Department of Orthopedic Surgery, Dokkyo Medical University, Tochigi  
21

22 <sup>8</sup>Department of Orthopedic Surgery, Tsukuba Medical Center, Ibaraki  
23

24 <sup>9</sup>Department of Orthopedic Surgery, Funabashi Municipal Medical Center, Chiba  
25

26 <sup>10</sup>Department of Orthopedic Surgery, Chiba Rosai Hospital, Chiba  
27

28 <sup>11</sup>Department of Orthopedic Surgery, Kimitsu Chuo Hospital, Chiba  
29

30 <sup>12</sup>Department of Orthopedic Surgery, Tokai University School of Medicine, Kanagawa  
31

32 <sup>13</sup>Department of Orthopedic Surgery, Hamamatsu University School of Medicine, Shizuoka  
33

34 <sup>14</sup>Department of Orthopedic Surgery, Graduate School of Medicine, Mie University, Mie  
35

36 <sup>15</sup>Department of Orthopedic Surgery, Kobe Red Cross Hospital, Hyogo  
37

38 <sup>16</sup>Department of Orthopedic Surgery, Graduate School of Biomedical Sciences, Hiroshima  
39 University, Hiroshima

40 <sup>17</sup>Department of Orthopedic Surgery, Nagasaki Rosai Hospital, Nagasaki  
41

42 <sup>18</sup>Department of Orthopedic Surgery, Chubu Rosai Hospital, Aichi  
43

44 <sup>19</sup>Department of Orthopedic Surgery, Tohoku University School of Medicine, Miyagi  
45

46 <sup>20</sup>Department of Orthopedic Surgery, Gifu University School of Medicine, Gifu  
47

48 <sup>21</sup>Department of Orthopedic Surgery, Yamaguchi University Graduate School of Medicine,  
49 Yamaguchi  
50

51  
52 Word Count: 2516  
53  
54  
55  
56  
57

## Abstract

**Introduction:** Granulocyte Colony Stimulating Factor (G-CSF) is generally used for neutropenia. Previous experimental studies revealed that G-CSF promoted neurological recovery after spinal cord injury (SCI). Next we moved to early phase of clinical trials. In a phase 1/2a trial, no adverse events were observed. Next, we conducted a non-randomized, non-blinded, comparative trial, which suggested the efficacy of G-CSF for promoting neurological recovery. Based on those results, we are now performing a phase 3 trial.

**Methods and Analysis:** The objective of this study is to prove the efficacy of G-CSF for acute SCI. The study design is a prospective, multicenter, randomized, double-blinded, placebo-controlled comparative study. The current trial includes cervical SCI (severity of American Spinal Injury Association (ASIA) Impairment Scale B/C) within 48 hours after injury. Patients are randomly assigned to G-CSF and placebo groups. The G-CSF group is administered 400  $\mu\text{g}/\text{m}^2/\text{d}\times 5\text{d}$  of G-CSF in normal saline via intravenous infusion for 5 consecutive days. The placebo group is similarly administered a placebo. Our primary endpoint is changes in ASIA motor scores from baseline to 3 months. Each group includes 44 patients (88 total patients). This trial is funded by the Center for Clinical Trials, Japan Medical Association.

**Ethics and Dissemination:** The study was approved by the Institutional Review Board of each institution and will be conducted according to the principles of the World Medical Association Declaration of Helsinki and in accordance with the Japanese Medical Research Involving Human Subjects Act and other guidelines, regulations and Acts. Results of the clinical study will be submitted to the head of the respective clinical study site as a report after conclusion of the clinical study by the sponsor-investigator. Even if the results are not favorable despite conducting the clinical study properly, the data will be published as a paper.

**Registration:** UMIN000018752

<https://upload.umin.ac.jp/cgi-open-bin/ctr/ctr.cgi?function=brows&action=brows&type=summary&recptno=R000021694&language=J>

## Strengths and Limitations of This Study

### *Strengths*

- ✓ Novel drug therapy for acute spinal cord injury is much-needed.
- ✓ Randomized, placebo-controlled, double-blinded design can eliminate bias.

### *Limitations*

- ✓ Acute spinal cord injury patients are difficult to recruit to the trial.
- ✓ Patient's neurological status in acute phase is unstable, possibly resulting in dispersion of the patient's background.
- ✓ Concealment must be performed very strictly because G-CSF apparently increases



white blood cell count.

## Introduction

Spinal cord injury (SCI) is a devastating injury by which the patient can suffer from long-lasting severe sequelae including palsy of extremities, sensory disturbance, bowel/bladder/sexual dysfunction, and neuropathic pain. Conceptually, SCI is divided into two chronological phases: a primary and a secondary phase. Primary injury is mechanical damage to spinal cord tissue itself caused by fracture and/or dislocation or compression. Secondary injury is triggered by the primary injury and is a biological reaction of the spinal cord, which includes ischemia, hemorrhage, excitotoxicity, hyperpermeability, and inflammation<sup>1</sup>. Because secondary injury can be the main target of treatment, extensive laboratory and clinical investigation of neuroprotection is needed to manage secondary injury<sup>2</sup>.

To date, the only approved neuroprotective therapy for SCI is massive methylprednisolone sodium succinate (MPSS) therapy based on the NASCIS 2 study<sup>3</sup>. However, recent reports revealed that MPSS shows only a modest effect for SCI. In addition, several reports have described adverse events induced by MPSS for SCI including infections (pneumonia, urinary tract infection) and gastrointestinal disorders (gastric ulcer, etc.)<sup>4</sup>. Therefore, the use of MPSS for SCI has become controversial<sup>5</sup>. Accordingly, a new therapeutic drug for SCI is desirable.

Granulocyte colony-stimulating factor (G-CSF, generic name: filgrastim) is a growth factor that affects the hematopoietic system, promoting differentiation, proliferation, and survival of granulocytes<sup>6</sup>. Clinically, in Japan, G-CSF is administered to patients with leukopenia, and to peripheral stem cell transplantation donors, G-CSF is administered to mobilize hematopoietic stem cells into the peripheral blood<sup>7</sup>. In the central nervous system, G-CSF has properties to mobilize the movement of bone marrow cells into the brain<sup>8</sup> and spine, and in a stroke model, has shown neuroprotective properties<sup>9</sup>. In other countries, clinical studies of the effects of G-CSF in cerebral infarction have been reported<sup>10</sup>.

To prove the hypothesis that G-CSF has neuroprotective properties against SCI, G-CSF was administered to rat and mouse animal models of spinal cord injury, and hind limb

1  
2  
3  
4  
5  
6 function improved significantly after administration of G-CSF. Further investigations into  
7 the mechanism of action of G-CSF in SCI were conducted. Data obtained to date identify  
8 the following properties of G-CSF: [1] mobilization of bone marrow-derived stem cells  
9 causing their biointegration at the site of SCI<sup>11</sup>, [2] direct inhibition of nerve cell death<sup>12</sup>,  
10 [3] protection of the myelin sheath by inhibiting oligodendrocyte cell death<sup>13</sup>, [4] inhibition  
11 of inflammatory cytokine expression (TNF- $\alpha$ , IL-1 $\beta$ )<sup>13</sup>, and [5] promotion of  
12 neovascularization<sup>14</sup>. These properties suggest that G-CSF has a neuroprotective effect in  
13 acute SCI.  
14  
15

16  
17  
18  
19 Based on these properties, a phase 1/2a clinical study was conducted where the main  
20 objective was to confirm the safety and feasibility of G-CSF for treatment of patients with  
21 acute SCI<sup>15</sup>. This study was an open-label, dose-titrating study with no control group. As  
22 the initial step, 5 patients were given 5  $\mu\text{g}/\text{kg}/\text{day}$  of G-CSF for 5 consecutive days by i.v.  
23 infusion, and as the second step, 11 patients were given 10  $\mu\text{g}/\text{kg}/\text{day}$  of G-CSF for 5  
24 consecutive days by i.v. infusion. No serious adverse events were noted, and the safety of  
25 G-CSF administration in patients with acute SCI was confirmed<sup>15</sup>.  
26  
27  
28  
29

30  
31 As a next step, to validate the efficacy of G-CSF in neuroprotective treatment, a  
32 multicenter, prospective, nonrandomized, nonblinded, comparative control study (phase 2b  
33 clinical trial) was conducted<sup>16</sup>. Based on the results of the previous phase 1/2a clinical trial,  
34 the dosage and duration of treatment with G-CSF in this study was 10  $\mu\text{g}/\text{kg}/\text{day}$  for 5  
35 consecutive days. Patients with acute cervical SCI (within 48 h of injury) were registered in  
36 the clinical trial and allocated to either the G-CSF group (G-CSF 10  $\mu\text{g}/\text{kg}/\text{day} \times 5$  days i.v.  
37 infusion) or control group (no G-CSF administration) at each treatment facility. A total of  
38 19 patients in the G-CSF group and 26 patients in the control group were observed for 3  
39 months or longer. American Spinal Injury Association (ASIA) motor score (motor: 0 to 100  
40 points) was compared between the groups. ASIA motor scores were  $26.1 \pm 18.9$  in the  
41 G-CSF group and  $12.2 \pm 14.7$  in the control group showing a significant improvement of  
42 motor paralysis in the G-CSF group ( $p < 0.01$ ). In addition, in cases that could be followed  
43 for 1 year or longer, a significant improvement of ASIA motor score was observed in the  
44 G-CSF group<sup>16</sup>.  
45  
46  
47  
48  
49  
50  
51  
52  
53  
54  
55  
56  
57

1  
2  
3  
4  
5 Based on results of these preclinical and early phase clinical trials, we are now  
6 conducting a phase 3 confirmative trial.

### 7 8 9 *Specific Objective*

10 The objective of this study is to prove the efficacy of G-CSF for improving motor  
11 paralysis in acute SCI.  
12  
13

## 14 15 **Methods and Analysis**

### 16 17 *Design of the study*

18 The study design of the current trial is a prospective, multicenter, randomized,  
19 double-blinded, placebo-controlled comparative study.  
20  
21  
22  
23

### 24 25 *Study Procedures*

26 Patients will be randomly assigned to G-CSF and placebo groups. A central registration  
27 system will be used for dynamic randomization into the investigational treatment group  
28 (G-CSF) and control group (placebo) based on age at registration (16–64 years of age, or  
29 65–84 years of age) and severity of paralysis (AIS B or C) at 48 h after injury. Each subject  
30 will be randomly allocated to either the investigational treatment group (G-CSF) or control  
31 group (placebo) in a 1 to 1 ratio. The subject registration center uses a program based on an  
32 appropriate computer algorithm to allocate patients into groups.  
33  
34  
35  
36  
37

38 The G-CSF group will be administered  $400 \mu\text{g}/\text{m}^2/\text{d} \times 5\text{d}$  of G-CSF in normal saline via  
39 intravenous infusion for 5 consecutive days. The placebo group will be similarly  
40 administered a placebo. Allocation will be concealed between blinded evaluators of  
41 efficacy/safety and those for laboratory data, as G-CSF markedly increases white blood cell  
42 counts that can reveal patient treatment.  
43  
44  
45  
46

47 Our primary endpoint is changes in ASIA motor scores from baseline to 3 months  
48 calculated as follows: 3-month ASIA motor score change = 3-month ASIA motor score –  
49 pretreatment ASIA motor score.  
50  
51

52 Secondary endpoints are as follows. [1] Change in ASIA motor scores at 6 months and  
53 12 months after G-CSF administration compared with pretreatment. [2] Changes in sensory  
54  
55  
56  
57

1  
2  
3  
4  
5  
6 paralysis over time: change in ASIA sensory scores at 3 months, 6 months, and 12 months  
7 after G-CSF administration compared with pretreatment. [3] Severity of functional  
8 compromise because of paralysis: AIS before administration and at 3, 6, and 12 months  
9 after administration of G-CSF. [4] Percentage of responders: percentage of patients whose  
10 AIS improved by 1 grade or more at 3, 6, and 12 months after administration compared  
11 with before administration of G-CSF. [5] Neurological level of injury (NLI): percentage of  
12 patients whose NLI decreased by 1 grade or more at 3, 6, or 12 months after administration  
13 of G-CSF compared with pretreatment. [6] SCIM: change in ASIA motor scores at 3, 6, and  
14 12 months after G-CSF administration compared with pretreatment [7] EQ-5D: measured  
15 EQ-5D efficacy scores at 3, 6, and 12 months after G-CSF.  
16  
17  
18  
19  
20  
21  
22

23 Each group will include 44 patients (88 patients in total). Our protocol was approved by  
24 the Pharmaceuticals and Medical Device Agency and this trial will be funded by the Center  
25 for Clinical Trials, Japan Medical Association.  
26  
27  
28  
29

### 30 *Inclusion*

31 Inclusion criteria are as follows. [1] Patients with cervical SCI (severity of AIS B/C)  
32 within 48 h of injury. [2] Patients reassessed for neurological status at 48 h after injury, and  
33 those whose palsy is AIS B/C will be enrolled. [3] Patients with neurological level of injury  
34 between C4 and C7. [4] Patients with age of 16 to 85 years. [5] Patients who agree to  
35 participate in the current trial and from whom informed consent was obtained orally and in  
36 writing. [6] Patients who can be followed up for 12 months after SCI.  
37  
38  
39  
40  
41  
42  
43

### 44 *Exclusion*

45 Exclusion criteria are as follows. [1] Patients with neurological recovery to AIS D at  
46 neurological reassessment 48 h after SCI, because only AIS B/C patients will be included  
47 to standardize the severity of paresis in order to stratify the patients at the initiation of drug  
48 administration. [2] Allergy to G-CSF. [3] Hematological malignancy, [4] within 6 months  
49 after invasive coronary intervention, [5] splenomegaly, or [6] pregnancy, [7] neurological  
50 disorders that can affect neurological evaluation in the present trial, [8] fracture of  
51  
52  
53  
54  
55  
56  
57  
58  
59  
60

1  
2  
3  
4  
5 extremities that can affect the neurological evaluation. Exclusion criteria 2 - 6 are set for  
6 safety and criteria 1, 7 and 8 are set to maintain homogeneity of the patient population  
7 enrolled.  
8  
9

### 10 11 12 *Concealment*

13  
14 Patients will be administered drug or placebo and be evaluated in a double-blinded  
15 manner. An evaluator blinded to the treatment will take charge of patient evaluation  
16 including clinical findings and paresis, without laboratory data because G-CSF induces an  
17 apparent increase of white blood cell count that makes it easy to distinguish G-CSF and  
18 placebo treatment. Therefore, a non-blinded evaluator for laboratory data will be assigned  
19 to evaluate laboratory data alone. From a safety point-of view, the dose of G-CSF will be  
20 modulated according to excessive increase of white blood cell count as shown in Table 2.  
21 Therefore, a non-blinded evaluator will instruct the pharmacy to modulate the dose of  
22 G-CSF based on white blood cell count.  
23  
24  
25  
26  
27  
28  
29  
30

### 31 *Sample Size Calculation*

32  
33 The target sample size for this randomized trial is 88. This number is based on the  
34 results of previous clinical trials<sup>16</sup>. The estimated group difference ( $\pm$  standard deviation) of  
35 change in ASIA motor scores from baseline to 3 months is 13.9 ( $\pm$  21.9). A sample size of  
36 44 patients in each group will provide 80% power to detect a difference of the change in  
37 ASIA motor scores between the G-CSF and the placebo treatments, using a mixed-effects  
38 models for repeated measures (MMRM) at a two-sided 5% level of significance. A  
39 common correlation of 0.25 at each time point is assumed. A dropout rate of 10% is  
40 allowed. Thus, the total sample size of 88 patients is required for the trial.  
41  
42  
43  
44  
45  
46  
47  
48

### 49 *Statistical analyses*

50 The analyses of the primary and secondary end points will be performed in a full  
51 analysis set, which includes all patients who: (1) took at least one course of treatment  
52 during the study; (2) do not present any serious violation of the study protocol; and (3) have  
53  
54  
55  
56  
57

1  
2  
3  
4  
5 data collected after commencement of treatment. For the baseline characteristics, summary  
6 statistics will comprise frequencies and proportions for categorical variables, and means  
7 and SDs for continuous variables. The patient characteristics will be compared using a  
8 chi-square test for categorical variables, and a *t* test or Wilcoxon rank sum test for  
9 continuous variables.  
10  
11  
12  
13

14 For the primary analysis, aimed at comparing treatment effects, a change in ASIA motor  
15 score from baseline to 3 months and its 95% confidence interval (CI) will be estimated  
16 using the MMRM. To test for significant association of the primary endpoint, a mixed  
17 effects model for repeated measures with an unstructured covariance matrix will be applied  
18 to adjust for age (<65 years or ≥65 years) and AIS at 48 h after the injury (B or C).  
19  
20  
21  
22

23 For the secondary analysis, the change in ASIA motor score will be compared using a  
24 Student *t* test and the 95% CI will be estimated. The same method will be applied to change  
25 in sensory score, SCIM, and EQ-5D. A chi-squared test will be applied to the frequencies of  
26 the responder in AIS and of the improvement in NLI. The frequency of AIS will be  
27 summarized. The frequency of AEs will be compared using a Fisher exact test.  
28  
29  
30

31 All comparisons are planned and all *p* values will be two sided. *p* < 0.05 will be  
32 considered significant. All statistical analyses will be performed using SAS software  
33 (version 9.4; SAS Institute, Cary, NC, USA). The statistical analysis plan will be developed  
34 by the principal investigator and the biostatistician before completion of patient recruitment  
35 and fixing of data.  
36  
37  
38  
39  
40  
41

#### 42 *Data Monitoring Committee*

43 The data monitoring committee consists of three clinical trial specialists, including a  
44 biostatistician, who are independent from the current study. The committee will meet at  
45 least 2 times per year and all the data obtained by the current trial will be checked by the  
46 committee.  
47  
48  
49  
50  
51

#### 52 *Adverse Events*

53 As for safety evaluation, adverse events will be collected as follows. “Adverse events”  
54  
55  
56  
57

1  
2  
3  
4  
5 refers to any untoward symptom or disease or signs of such (including clinical laboratory  
6 data abnormalities) in a clinical investigation subject after informed consent and does not  
7 necessarily have a causal relationship with the investigational product (G-CSF).  
8  
9

10 Increases in white blood counts will be considered an adverse event only when the  
11 count exceeds 50,000/ $\mu$ L from the perspective of a pharmacological effect of G-CSF, and  
12 any values below this will not be handled as an adverse event.  
13  
14

15 All adverse events will code terminology used by the investigators according to the ICH  
16 International Medical Dictionary for Regulatory Activities Japanese version (MedDRA/J).  
17  
18  
19

## 20 21 **Ethics and Dissemination**

### 22 *Ethics*

23  
24 The study was approved by the Institutional Review Board (IRB) of each institutions  
25 involved to the present trial and will be conducted according to the principles of the World  
26 Medical Association (WMA) Declaration of Helsinki—Ethical Principles for Medical  
27 Research Involving Human Subjects with the amendments made in Seoul, South Korea,  
28 October 2008, with a Note of Clarification on Paragraph 29 added by the WMA General  
29 Assembly, Washington 2002; Note of Clarification on Paragraph 30 added by the WMA  
30 General Assembly, Tokyo 2004, and in accordance with the Japanese Medical Research  
31 Involving Human Subjects Act (WMO) and other guidelines, regulations and Acts.  
32  
33  
34  
35  
36  
37

### 38 *Public Disclosure and Publication Policy*

39  
40 Results of the clinical study will be submitted to the head of the respective clinical  
41 study site as a report after conclusion of the clinical study by the sponsor-investigator  
42 (includes study coordinating investigator). Even if the results are not favorable despite  
43 conducting the clinical study properly, the data will be published as a paper. Other  
44 sponsor-investigators (including the clinical study coordinating investigator), if they plan to  
45 publicize the data from this study in a specialized academic society conference or other  
46 external site, must first obtain permission from the other principal investigators and  
47 investigational product provider. In publicizing the results, the confidentiality of the  
48 subjects will be maintained and proofread in advance by the other sponsor-investigators  
49  
50  
51  
52  
53  
54  
55  
56  
57  
58  
59  
60

(includes coordinating investigator) and investigational product provider.

## Discussion

The current trial is a confirmative trial to elucidate the therapeutic efficacy of G-CSF for SCI. If the current trial can successfully show significant improvement of motor paralysis of SCI by G-CSF, we will move forward to drug approval application to the Ministry for Health and Labor, Japan. The entire protocol of the current trial was approved beforehand for the initiation of the current trial by the Japanese Pharmaceutical and Medical Device Agency (PMDA). The PMDA will also permit a drug approval application if significant efficacy of G-CSF for SCI is proven.

The current trial is an important milestone for SCI clinics and research to explore G-CSF for SCI.

### *Trial Status*

The present trial is now on-going.

### *Trial Sites*

Nineteen major hospitals in Japan constituting the G-SPIRIT study group as follows: Tohoku University Hospital, Miyagi; Niigata University, Niigata; Dokkyo University Hospital, Tochigi; Tsukuba University Hospital, Ibaraki; Tsukuba Medical Center, Ibaraki; Chiba University Hospital, Chiba; Funabashi Municipal Medical Center, Chiba; Kimitsu Chuo Hospital, Chiba; Chiba Rosai Hospital, Chiba; Tokai University Hospital, Kanagawa; Hamamatsu University Hospital, Shizuoka; Gifu University Hospital, Gifu; Chubu Rosai Hospital, Aichi; Mie University Hospital, Mie; Kanazawa Medical Collage, Ishikawa; Kobe Red Cross Hospital, Hyogo; Hiroshima University Hospital, Hiroshima; Yamaguchi University Hospital, Yamaguchi; and Nagasaki Rosai Hospital, Nagasaki.

## Funding Statement

This trial is supported by Center for Clinical trials, Japan Medical Association, Japan.



## Competing Interests

No authors have any competing interests to declare.

## Contributorship Statement

MK, TF and MY contributed to planning and conduct of the present trial and to reporting the present protocol paper. HH, TS, YF, MH and ST contributed to conception and design of the present trial protocol and to reporting the present protocol paper. YI, JS, MK, SO, YM, TA, KW, TH, MO, HS, TM, IT, NK, MK. YO, TS, MY, MF, KY, DS, HT, DT, SI, HM, HU, FA, YS, IA, YT, MM, JS, YS, SI, HS, KT, YI, FN, MH, TO, FH, TF, KK, MW, HK, YM, YY, DT, TH, SK, GY, SO, TB, HA, KA, EK, HI, TS, AS, YI, TK, SO, NT, KN, NK, SK, HB, TO, HK, TY, IK, KY, TM, TM, IM, HK, TA, KH, TE, TS, MM, KF, SN, CI, TT, TK, HS, NN and MF contributed to conducting the present trial and to acquisition of data.

## References

1. Oyinbo CA. Secondary injury mechanisms in traumatic spinal cord injury: a nugget of multiply cascade. *Acta Neurobiol Exp* 2011;71:281-299.
2. Karsy M, Hawryluk G. Pharmacologic Management of Acute Spinal Cord Injury. *Neurosurg Clin N Am* 2017;28:49-62. doi: 10.1016/j.nec.2016.07.002.
3. Bracken MB, Shepard MJ, Collins WF, et al. A randomized controlled trial of methylprednisolone or naloxone in the treatment of acute spinal cord injury: results of the second national acute spinal cord injury study. *N Engl J Med* 1990;322:1405-1411.
4. Matsumoto T, Tamaki T, Kawakami M, et al. Early complications of high-dose methyl-prednisolone sodium succinate treatment in the follow-up of acute cervical spinal cord injury. *Spine* 2001;26: 426-430.
5. Hurlbert RJ, Hadley, Walters BC, et al. Pharmacological Therapy for Acute Spinal cord Injury. *Neurosurgery* 2013;72: 93-105.
6. Nicola NA, Metcalf D, Matsumoto M, Johnson GR. Purification of a factor inducing

- 1  
2  
3  
4  
5 differentiation in murine myelomonocytic leukemia cells. Identification as  
6 granulocyte colony-stimulating factor. *J Biol Chem* 1983;258: 9017-9023.
- 7  
8  
9 7. Roberts AW: G-CSF: a key regulator of neutrophil production, but that's no all!  
10 *Growth Factors* 2005;23: 33–41.
- 11  
12 8. Kawada H, Takizawa S, Takanashi T, et al. Administration of hematopoietic  
13 cytokines in the subacute phase after cerebral infarction is effective for functional  
14 recovery facilitating proliferation of intrinsic neural stem/progenitor cells and  
15 transition of bone marrow-derived neuronal cells. *Circulation* 2006;113: 701-710.
- 16  
17  
18 9. Schneider A, Kruger C, Steigleder T, et al. The hematopoietic factor G-CSF is a  
19 neuronal ligand that counteracts programmed cell death and drives neurogenesis. *J*  
20 *Clin Invest* 2005;115: 2083-2098.
- 21  
22  
23 10. Shyu WC, Lin SZ, Lee CC, Liu DD, Li H. Granulocyte colony-stimulating factor for  
24 acute ischemic stroke: a randomized controlled trial. *CMAJ* 2006;174: 927-933.
- 25  
26  
27 11. Koda M, Nishio Y, Kamada T, et al. Granulocyte colony-stimulating factor (G-CSF)  
28 mobilizes bone marrow-derived cells into injured spinal cord and promotes functional  
29 recovery after compression-induced spinal cord injury in mice. *Brain Res* 2007;1149:  
30 223-231.
- 31  
32  
33 12. Nishio Y, Koda M, Kamada T, et al. Granulocyte colony-stimulating factor (G-CSF)  
34 attenuates neuronal death and promotes functional recovery after spinal cord injury in  
35 mice. *J Neuropathol Exp Neurol* 2007;66: 724-731.
- 36  
37  
38 13. Kadota R, Koda M, Kawabe J, et al. Granulocyte colony-stimulating factor (G-CSF)  
39 protects oligodendrocyte and promotes hindlimb functional recovery after spinal cord  
40 injury in rats. *PLoS One* 2012;7:e50391.
- 41  
42  
43 14. Kawabe J, Koda M, Hashimoto M, et al. Granulocyte colony-stimulating factor  
44 (G-CSF) exerts neuroprotective effects via promoting angiogenesis after spinal  
45 cord injury in rats. *J Neurosurg Spine* 2011;15: 414-421.
- 46  
47  
48 15. Takahashi H, Yamazaki M, Okawa A, et al. Neuroprotective therapy using  
49 granulocyte colony-stimulating factor for acute spinal cord injury: a phase I/IIa  
50 clinical trial. *Eur Spine J* 2012;21:2580-2587.
- 51  
52  
53  
54  
55  
56  
57  
58  
59  
60

- 1  
2  
3  
4  
5  
6 16. Inada T, Takahashi H, Yamazaki M, et al. A multicenter prospective non-randomized  
7 controlled clinical trial to prove neurotherapeutic effects of granulocyte  
8 colony-stimulating factor (G-CSF) for acute spinal cord injury: Analyses of  
9 follow-up cases after at least one year. *Spine* 2014;39:213-219.  
10  
11  
12  
13  
14  
15  
16  
17  
18  
19  
20  
21  
22  
23  
24  
25  
26  
27  
28  
29  
30  
31  
32  
33  
34  
35  
36  
37  
38  
39  
40  
41  
42  
43  
44  
45  
46  
47  
48  
49  
50  
51  
52  
53  
54  
55  
56  
57

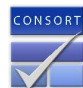

## CONSORT 2010 checklist of information to include when reporting a randomised trial\*

| Section/Topic                    | Item No | Checklist item                                                                                                                                                                              | Reported on page No |
|----------------------------------|---------|---------------------------------------------------------------------------------------------------------------------------------------------------------------------------------------------|---------------------|
| <b>Title and abstract</b>        |         |                                                                                                                                                                                             |                     |
|                                  | 1a      | Identification as a randomised trial in the title                                                                                                                                           | 1                   |
|                                  | 1b      | Structured summary of trial design, methods, results, and conclusions (for specific guidance see CONSORT for abstracts)                                                                     | 3                   |
| <b>Introduction</b>              |         |                                                                                                                                                                                             |                     |
| Background and objectives        | 2a      | Scientific background and explanation of rationale                                                                                                                                          | 4-5                 |
|                                  | 2b      | Specific objectives or hypotheses                                                                                                                                                           | 6                   |
| <b>Methods</b>                   |         |                                                                                                                                                                                             |                     |
| Trial design                     | 3a      | Description of trial design (such as parallel, factorial) including allocation ratio                                                                                                        | 6                   |
|                                  | 3b      | Important changes to methods after trial commencement (such as eligibility criteria), with reasons                                                                                          | N/A                 |
| Participants                     | 4a      | Eligibility criteria for participants                                                                                                                                                       | 7                   |
|                                  | 4b      | Settings and locations where the data were collected                                                                                                                                        | 11                  |
| Interventions                    | 5       | The interventions for each group with sufficient details to allow replication, including how and when they were actually administered                                                       | 6-7                 |
| Outcomes                         | 6a      | Completely defined pre-specified primary and secondary outcome measures, including how and when they were assessed                                                                          | 6-7                 |
|                                  | 6b      | Any changes to trial outcomes after the trial commenced, with reasons                                                                                                                       | N/A                 |
| Sample size                      | 7a      | How sample size was determined                                                                                                                                                              | 8                   |
|                                  | 7b      | When applicable, explanation of any interim analyses and stopping guidelines                                                                                                                | N/A                 |
| <b>Randomisation:</b>            |         |                                                                                                                                                                                             |                     |
| Sequence generation              | 8a      | Method used to generate the random allocation sequence                                                                                                                                      | 6                   |
|                                  | 8b      | Type of randomisation; details of any restriction (such as blocking and block size)                                                                                                         | 6                   |
| Allocation concealment mechanism | 9       | Mechanism used to implement the random allocation sequence (such as sequentially numbered containers), describing any steps taken to conceal the sequence until interventions were assigned | 8                   |
| Implementation                   | 10      | Who generated the random allocation sequence, who enrolled participants, and who assigned participants to interventions                                                                     | 6                   |
| Blinding                         | 11a     | If done, who was blinded after assignment to interventions (for example, participants, care providers, those                                                                                | 8                   |

|    |                          |                                                                                                                     |     |
|----|--------------------------|---------------------------------------------------------------------------------------------------------------------|-----|
| 1  |                          |                                                                                                                     |     |
| 2  |                          | assessing outcomes) and how                                                                                         |     |
| 3  |                          |                                                                                                                     |     |
| 4  |                          | 11b If relevant, description of the similarity of interventions                                                     | N/A |
| 5  | Statistical methods      | 12a Statistical methods used to compare groups for primary and secondary outcomes                                   | 8-9 |
| 6  |                          | 12b Methods for additional analyses, such as subgroup analyses and adjusted analyses                                | N/A |
| 7  |                          |                                                                                                                     |     |
| 8  | <b>Results</b>           |                                                                                                                     |     |
| 9  | Participant flow (a      | 13a For each group, the numbers of participants who were randomly assigned, received intended treatment, and        | N/A |
| 10 | diagram is strongly      | were analysed for the primary outcome                                                                               |     |
| 11 | recommended)             | 13b For each group, losses and exclusions after randomisation, together with reasons                                | N/A |
| 12 | Recruitment              | 14a Dates defining the periods of recruitment and follow-up                                                         | N/A |
| 13 |                          | 14b Why the trial ended or was stopped                                                                              | N/A |
| 14 | Baseline data            | 15 A table showing baseline demographic and clinical characteristics for each group                                 | N/A |
| 15 | Numbers analysed         | 16 For each group, number of participants (denominator) included in each analysis and whether the analysis was      | N/A |
| 16 |                          | by original assigned groups                                                                                         |     |
| 17 |                          |                                                                                                                     |     |
| 18 | Outcomes and             | 17a For each primary and secondary outcome, results for each group, and the estimated effect size and its           | N/A |
| 19 | estimation               | precision (such as 95% confidence interval)                                                                         |     |
| 20 |                          | 17b For binary outcomes, presentation of both absolute and relative effect sizes is recommended                     | N/A |
| 21 | Ancillary analyses       | 18 Results of any other analyses performed, including subgroup analyses and adjusted analyses, distinguishing       | N/A |
| 22 |                          | pre-specified from exploratory                                                                                      |     |
| 23 |                          |                                                                                                                     |     |
| 24 | Harms                    | 19 All important harms or unintended effects in each group (for specific guidance see CONSORT for harms)            | N/A |
| 25 |                          |                                                                                                                     |     |
| 26 | <b>Discussion</b>        |                                                                                                                     |     |
| 27 | Limitations              | 20 Trial limitations, addressing sources of potential bias, imprecision, and, if relevant, multiplicity of analyses | N/A |
| 28 | Generalisability         | 21 Generalisability (external validity, applicability) of the trial findings                                        | N/A |
| 29 | Interpretation           | 22 Interpretation consistent with results, balancing benefits and harms, and considering other relevant evidence    | N/A |
| 30 |                          |                                                                                                                     |     |
| 31 | <b>Other information</b> |                                                                                                                     |     |
| 32 | Registration             | 23 Registration number and name of trial registry                                                                   | 3   |
| 33 | Protocol                 | 24 Where the full trial protocol can be accessed, if available                                                      | 3   |
| 34 | Funding                  | 25 Sources of funding and other support (such as supply of drugs), role of funders                                  | 11  |
| 35 |                          |                                                                                                                     |     |

36

37 \*We strongly recommend reading this statement in conjunction with the CONSORT 2010 Explanation and Elaboration for important clarifications on all the items. If relevant, we also

38 recommend reading CONSORT extensions for cluster randomised trials, non-inferiority and equivalence trials, non-pharmacological treatments, herbal interventions, and pragmatic trials.

39 Additional extensions are forthcoming: for those and for up to date references relevant to this checklist, see [www.consort-statement.org](http://www.consort-statement.org).

40

41

# BMJ Open

## Study Protocol for the G-SPIRIT trial: A Randomized, Placebo-Controlled, Double-blinded Phase 3 Trial of Granulocyte Colony Stimulating Factor-Mediated Neuroprotection for Acute Spinal Cord Injury

|                               |                                                                                                                                                                                                                                                                                                                                                                                                                                                                                                                                                                                                                                                                                                                                                                                                                                                                                                                                                                                                                                                                                                                                                                                                                                                                                                                                                                                                                                                                                                                                                                                                                                                                                                                                                                                                                                                                                                                                                                                                                                                                                                                                                                                                                                                                                                                                                                                                                                   |
|-------------------------------|-----------------------------------------------------------------------------------------------------------------------------------------------------------------------------------------------------------------------------------------------------------------------------------------------------------------------------------------------------------------------------------------------------------------------------------------------------------------------------------------------------------------------------------------------------------------------------------------------------------------------------------------------------------------------------------------------------------------------------------------------------------------------------------------------------------------------------------------------------------------------------------------------------------------------------------------------------------------------------------------------------------------------------------------------------------------------------------------------------------------------------------------------------------------------------------------------------------------------------------------------------------------------------------------------------------------------------------------------------------------------------------------------------------------------------------------------------------------------------------------------------------------------------------------------------------------------------------------------------------------------------------------------------------------------------------------------------------------------------------------------------------------------------------------------------------------------------------------------------------------------------------------------------------------------------------------------------------------------------------------------------------------------------------------------------------------------------------------------------------------------------------------------------------------------------------------------------------------------------------------------------------------------------------------------------------------------------------------------------------------------------------------------------------------------------------|
| Journal:                      | <i>BMJ Open</i>                                                                                                                                                                                                                                                                                                                                                                                                                                                                                                                                                                                                                                                                                                                                                                                                                                                                                                                                                                                                                                                                                                                                                                                                                                                                                                                                                                                                                                                                                                                                                                                                                                                                                                                                                                                                                                                                                                                                                                                                                                                                                                                                                                                                                                                                                                                                                                                                                   |
| Manuscript ID                 | bmjopen-2017-019083.R1                                                                                                                                                                                                                                                                                                                                                                                                                                                                                                                                                                                                                                                                                                                                                                                                                                                                                                                                                                                                                                                                                                                                                                                                                                                                                                                                                                                                                                                                                                                                                                                                                                                                                                                                                                                                                                                                                                                                                                                                                                                                                                                                                                                                                                                                                                                                                                                                            |
| Article Type:                 | Protocol                                                                                                                                                                                                                                                                                                                                                                                                                                                                                                                                                                                                                                                                                                                                                                                                                                                                                                                                                                                                                                                                                                                                                                                                                                                                                                                                                                                                                                                                                                                                                                                                                                                                                                                                                                                                                                                                                                                                                                                                                                                                                                                                                                                                                                                                                                                                                                                                                          |
| Date Submitted by the Author: | 12-Oct-2017                                                                                                                                                                                                                                                                                                                                                                                                                                                                                                                                                                                                                                                                                                                                                                                                                                                                                                                                                                                                                                                                                                                                                                                                                                                                                                                                                                                                                                                                                                                                                                                                                                                                                                                                                                                                                                                                                                                                                                                                                                                                                                                                                                                                                                                                                                                                                                                                                       |
| Complete List of Authors:     | <p>Koda, Masao; G-SPIRIT Study Group; University of Tsukuba, Department of Orthopedic Surgery<br/> Hanaoka, Hideki; G-SPIRIT Study Group; Chiba University Hospital, Clinical Research Center<br/> Sato, Takatoshi; G-SPIRIT Study Group; Chiba University Hospital, Clinical Research Center<br/> Fujii, Yasuhisa; G-SPIRIT Study Group; Chiba University Hospital, Clinical Research Center<br/> Hanawa, Michiko; G-SPIRIT Study Group; Chiba University Hospital, Clinical Research Center<br/> Takahashi, Sho; G-SPIRIT Study Group; Chiba University Hospital, Clinical Research Center<br/> Furuya, Takeo; G-SPIRIT Study Group; Graduate School of Medicine, Chiba University, Department of Orthopaedic Surgery<br/> Ijima, Yasushi; G-SPIRIT Study Group; Graduate School of Medicine, Chiba University, Department of Orthopaedic Surgery<br/> Saito, Junya; G-SPIRIT Study Group; Graduate School of Medicine, Chiba University, Department of Orthopaedic Surgery<br/> Kitamura, Mitsuhiro; G-SPIRIT Study Group; Graduate School of Medicine, Chiba University, Department of Orthopaedic Surgery<br/> Ohtori, Seiji; G-SPIRIT Study Group; Graduate School of Medicine, Chiba University, Department of Orthopaedic Surgery<br/> Matsumoto, Yukei; G-SPIRIT Study Group; University of Tsukuba, Department of Orthopedic Surgery<br/> Abe, Tetsuya; G-SPIRIT Study Group; University of Tsukuba, Department of Orthopedic Surgery<br/> Watanabe, Kei; G-SPIRIT Study Group; Niigata University Graduate School of Medicine and Dental Sciences, Department of Orthopedic Surgery<br/> Hirano, Toru; G-SPIRIT Study Group; Niigata University Graduate School of Medicine and Dental Sciences, Department of Orthopedic Surgery<br/> Ohashi, Masayuki; G-SPIRIT Study Group; Niigata University Graduate School of Medicine and Dental Sciences, Department of Orthopedic Surgery<br/> Shoji, Hirokazu; G-SPIRIT Study Group; Niigata University Graduate School of Medicine and Dental Sciences, Department of Orthopedic Surgery<br/> Mizouchi, Tatsuki; G-SPIRIT Study Group; Niigata University Graduate School of Medicine and Dental Sciences, Department of Orthopedic Surgery<br/> Takahashi, Ikuko; G-SPIRIT Study Group; Niigata University Graduate School of Medicine and Dental Sciences, Department of Orthopedic Surgery<br/> Kawahara, Norio; G-SPIRIT Study Group; Kanazawa Medical University,</p> |

|    |                                                                         |
|----|-------------------------------------------------------------------------|
| 1  |                                                                         |
| 2  |                                                                         |
| 3  |                                                                         |
| 4  | Orthopaedic Surgery                                                     |
| 5  | Kawaguchi, Masahito; G-SPIRIT Study Group; Kanazawa Medical             |
| 6  | University, Orthopaedic Surgery                                         |
| 7  | Orita, Yugo; G-SPIRIT Study Group; Kanazawa Medical University,         |
| 8  | Orthopaedic Surgery                                                     |
| 9  | Sasamoto, Takeshi; G-SPIRIT Study Group; Kanazawa Medical University,   |
| 10 | Orthopaedic Surgery                                                     |
| 11 | Yoshioka, Masahito; G-SPIRIT Study Group; Kanazawa Medical University,  |
| 12 | Orthopaedic Surgery                                                     |
| 13 | Fujii, Masafumi; G-SPIRIT Study Group; Kanazawa Medical University,     |
| 14 | Orthopaedic Surgery                                                     |
| 15 | Yonezawa, Katsutaka; G-SPIRIT Study Group; Kanazawa Medical             |
| 16 | University, Orthopaedic Surgery                                         |
| 17 | Soma, Daisuke; G-SPIRIT Study Group; Kanazawa Medical University,       |
| 18 | Orthopaedic Surgery                                                     |
| 19 | Taneichi, Hiroshi; G-SPIRIT Study Group; Dokkyo Ika Daigaku, Department |
| 20 | of Orthopedic Surgery                                                   |
| 21 | Takeuchi, Daisaku; G-SPIRIT Study Group; Dokkyo Ika Daigaku,            |
| 22 | Department of Orthopedic Surgery                                        |
| 23 | Inami, Satoshi; G-SPIRIT Study Group; Dokkyo Ika Daigaku, Department    |
| 24 | of Orthopedic Surgery                                                   |
| 25 | Moridaira, Hiroshi; G-SPIRIT Study Group; Dokkyo Ika Daigaku,           |
| 26 | Department of Orthopedic Surgery                                        |
| 27 | Ueda, Haruki; G-SPIRIT Study Group; Dokkyo Ika Daigaku, Department of   |
| 28 | Orthopedic Surgery                                                      |
| 29 | Asano, Futoshi; G-SPIRIT Study Group; Dokkyo Ika Daigaku, Department    |
| 30 | of Orthopedic Surgery                                                   |
| 31 | Shibao, Yosuke; G-SPIRIT Study Group; Dokkyo Ika Daigaku, Department    |
| 32 | of Orthopedic Surgery                                                   |
| 33 | Aita, Ikuo; G-SPIRIT Study Group; Tsukuba Medical Center Byoin,         |
| 34 | Department of Orthopedic Surgery                                        |
| 35 | Takeuchi, Yosuke; G-SPIRIT Study Group; Tsukuba Medical Center Byoin,   |
| 36 | Department of Orthopedic Surgery                                        |
| 37 | Mimura, Masaya; G-SPIRIT Study Group; Funabashi Shiritsu Iryo Center,   |
| 38 | Department of Orthopedic Surgery                                        |
| 39 | Shimbo, Jun; G-SPIRIT Study Group; Funabashi Shiritsu Iryo Center,      |
| 40 | Department of Orthopedic Surgery                                        |
| 41 | Someya, Yukio; G-SPIRIT Study Group; Funabashi Shiritsu Iryo Center,    |
| 42 | Department of Orthopedic Surgery                                        |
| 43 | Ikenoue, Sumio; G-SPIRIT Study Group; Funabashi Shiritsu Iryo Center,   |
| 44 | Department of Orthopedic Surgery                                        |
| 45 | Sameda, Hiroaki; G-SPIRIT Study Group; Funabashi Shiritsu Iryo Center,  |
| 46 | Department of Orthopedic Surgery                                        |
| 47 | Takase, Kan; G-SPIRIT Study Group; Funabashi Shiritsu Iryo Center,      |
| 48 | Department of Orthopedic Surgery                                        |
| 49 | Ikeda, Yoshikazu; G-SPIRIT Study Group; Chiba Rosai Byoin, Department   |
| 50 | of Orthopedic Surgery                                                   |
| 51 | Nakajima, Fumitake; G-SPIRIT Study Group; Chiba Rosai Byoin,            |
| 52 | Department of Orthopedic Surgery                                        |
| 53 | Hashimoto, Mitsuhiro; G-SPIRIT Study Group; Chiba Rosai Byoin,          |
| 54 | Department of Orthopedic Surgery                                        |
| 55 | Ozawa, Tomoyuki; G-SPIRIT Study Group; Chiba Rosai Byoin, Department    |
| 56 | of Orthopedic Surgery                                                   |
| 57 | Hasue, Fumio; G-SPIRIT Study Group; Kimitsu Chuo Byoin, Department of   |
| 58 | Orthopedic Surgery                                                      |
| 59 | Fujiyoshi, Takayuki; G-SPIRIT Study Group; Kimitsu Chuo Byoin,          |
| 60 | Department of Orthopedic Surgery                                        |
|    | Kamiya, Koshiro; G-SPIRIT Study Group; Kimitsu Chuo Byoin, Department   |
|    | of Orthopedic Surgery                                                   |
|    | Watanabe, Masahiko; G-SPIRIT Study Group; Tokai Daigaku Igakubu         |
|    | Seikei Gekagaku, Department of Orthopedic Surgery                       |

|    |                                                                          |
|----|--------------------------------------------------------------------------|
| 1  |                                                                          |
| 2  |                                                                          |
| 3  |                                                                          |
| 4  | Katoh, Hiroyuki; G-SPIRIT Study Group; Tokai Daigaku - Isehara Campus,   |
| 5  | Department of Orthopedic Surgery                                         |
| 6  | Matsuyama, Yukihiro; G-SPIRIT Study Group; Hamamatsu Ika Daigaku,        |
| 7  | Department of Orthopedic Surgery                                         |
| 8  | Yamato, Yu; G-SPIRIT Study Group; Hamamatsu Ika Daigaku, Department      |
| 9  | of Orthopedic Surgery                                                    |
| 10 | Togawa, Daisuke; G-SPIRIT Study Group; Hamamatsu Ika Daigaku,            |
| 11 | Department of Orthopedic Surgery                                         |
| 12 | Hasegawa, Tomohiko; G-SPIRIT Study Group; Hamamatsu Ika Daigaku,         |
| 13 | Department of Orthopedic Surgery                                         |
| 14 | Kobayashi, Sho; G-SPIRIT Study Group; Hamamatsu Ika Daigaku,             |
| 15 | Department of Orthopedic Surgery                                         |
| 16 | Yoshida, Go; G-SPIRIT Study Group; Hamamatsu Ika Daigaku, Department     |
| 17 | of Orthopedic Surgery                                                    |
| 18 | Oe, Shin; G-SPIRIT Study Group; Hamamatsu Ika Daigaku, Department of     |
| 19 | Orthopedic Surgery                                                       |
| 20 | Banno, Tomohiro; G-SPIRIT Study Group; Hamamatsu Ika Daigaku,            |
| 21 | Department of Orthopedic Surgery                                         |
| 22 | Arima, Hideyuki; G-SPIRIT Study Group; Hamamatsu Ika Daigaku,            |
| 23 | Department of Orthopedic Surgery                                         |
| 24 | Akeda, Koji; G-SPIRIT Study Group; Mie Daigaku Daigakuin Igakukei        |
| 25 | Kenkyuka Igakubu, Department of Orthopedic Surgery                       |
| 26 | Kawamoto, Eiji; G-SPIRIT Study Group; Mie Daigaku Daigakuin Igakukei     |
| 27 | Kenkyuka Igakubu, Department of Orthopedic Surgery                       |
| 28 | Imai, Hiroshi; G-SPIRIT Study Group; Mie Daigaku Daigakuin Igakukei      |
| 29 | Kenkyuka Igakubu, Department of Orthopedic Surgery                       |
| 30 | Sakakibara, Toshihiko; G-SPIRIT Study Group; Mie Daigaku Daigakuin       |
| 31 | Igakukei Kenkyuka Igakubu, Department of Orthopedic Surgery              |
| 32 | Sudo, Akihiro ; G-SPIRIT Study Group; Mie Daigaku Daigakuin Igakukei     |
| 33 | Kenkyuka Igakubu, Department of Orthopedic Surgery                       |
| 34 | Ito, Yasuo; G-SPIRIT Study Group; Kobe Sekijuji Byoin, Department of     |
| 35 | Orthopedic Surgery                                                       |
| 36 | Kikuchi, Tsuyoshi; G-SPIRIT Study Group; Kobe Sekijuji Byoin, Department |
| 37 | of Orthopedic Surgery                                                    |
| 38 | Osaki, Shuhei; G-SPIRIT Study Group; Kobe Sekijuji Byoin, Department of  |
| 39 | Orthopedic Surgery                                                       |
| 40 | Tanaka, Nobuhiro; G-SPIRIT Study Group; Hiroshima Daigaku Igakubu        |
| 41 | Daigakuin Ishiyaku Hokengaku Kenkyuka, Department of Orthopedic          |
| 42 | Surgery                                                                  |
| 43 | Nakanishi, Kazuyoshi; G-SPIRIT Study Group; Hiroshima Daigaku Igakubu    |
| 44 | Daigakuin Ishiyaku Hokengaku Kenkyuka, Department of Orthopedic          |
| 45 | Surgery                                                                  |
| 46 | Kamei, Naosuke; G-SPIRIT Study Group; Hiroshima Daigaku Igakubu          |
| 47 | Daigakuin Ishiyaku Hokengaku Kenkyuka, Department of Orthopedic          |
| 48 | Surgery                                                                  |
| 49 | Kotaka, Shinji; G-SPIRIT Study Group; Hiroshima Daigaku Igakubu          |
| 50 | Daigakuin Ishiyaku Hokengaku Kenkyuka, Department of Orthopedic          |
| 51 | Surgery                                                                  |
| 52 | Baba, Hideo; G-SPIRIT Study Group; Nagasaki Rosai Byoin, Department of   |
| 53 | Orthopedic Surgery                                                       |
| 54 | Okudaira, Tsuyoshi; G-SPIRIT Study Group; Nagasaki Rosai Byoin,          |
| 55 | Department of Orthopedic Surgery                                         |
| 56 | Hiroaki, Konishi; G-SPIRIT Study Group; Nagasaki Rosai Byoin,            |
| 57 | Department of Orthopedic Surgery                                         |
| 58 | Yamaguchi, Takayuki; G-SPIRIT Study Group; Nagasaki Rosai Byoin,         |
| 59 | Department of Orthopedic Surgery                                         |
| 60 | Ito, Keigo; G-SPIRIT Study Group; Chubu Rosai Byoin, Department of       |
|    | Orthopedic Surgery                                                       |
|    | Katayama, Yoshito; G-SPIRIT Study Group; Chubu Rosai Byoin,              |
|    | Department of Orthopedic Surgery                                         |
|    | Matsumoto, Taro; G-SPIRIT Study Group; Chubu Rosai Byoin, Department     |



|                                 |                                                                                                                                                                                                                                                                                                                                                                                                                                                                                                                                                                                                                                                                                                                                                                                                                                                                                                                                                                                                                                                                                                                                                                                                                                                                                                                                                                                                                                                                                                                                                                                                                                                                                                                                                                                                                                                                                                                                                                                                                                                                                                                                                                                                                                                                                                                                                                                                               |
|---------------------------------|---------------------------------------------------------------------------------------------------------------------------------------------------------------------------------------------------------------------------------------------------------------------------------------------------------------------------------------------------------------------------------------------------------------------------------------------------------------------------------------------------------------------------------------------------------------------------------------------------------------------------------------------------------------------------------------------------------------------------------------------------------------------------------------------------------------------------------------------------------------------------------------------------------------------------------------------------------------------------------------------------------------------------------------------------------------------------------------------------------------------------------------------------------------------------------------------------------------------------------------------------------------------------------------------------------------------------------------------------------------------------------------------------------------------------------------------------------------------------------------------------------------------------------------------------------------------------------------------------------------------------------------------------------------------------------------------------------------------------------------------------------------------------------------------------------------------------------------------------------------------------------------------------------------------------------------------------------------------------------------------------------------------------------------------------------------------------------------------------------------------------------------------------------------------------------------------------------------------------------------------------------------------------------------------------------------------------------------------------------------------------------------------------------------|
|                                 | <p>of Orthopedic Surgery<br/>         Matsumoto, Tomohiro; G-SPIRIT Study Group; Chubu Rosai Byoin, Department of Orthopedic Surgery<br/>         Idota, Masaru; G-SPIRIT Study Group; Chubu Rosai Byoin, Department of Orthopedic Surgery<br/>         Kanno, Haruo; G-SPIRIT Study Group; Tohoku University School of Medicine, Department of Orthopedic Surgery<br/>         Aizawa, Toshimi; G-SPIRIT Study Group; Tohoku University School of Medicine, Department of Orthopedic Surgery<br/>         Hashimoto, Ko; G-SPIRIT Study Group; Tohoku University School of Medicine, Department of Orthopedic Surgery<br/>         Eto, Toshimitsu; G-SPIRIT Study Group; Tohoku University School of Medicine, Department of Orthopedic Surgery<br/>         Sugaya, Takehiro; G-SPIRIT Study Group; Tohoku University School of Medicine, Department of Orthopedic Surgery<br/>         Matsuda, Michiharu; G-SPIRIT Study Group; Tohoku University School of Medicine, Department of Orthopedic Surgery<br/>         Fushimi, Kazunari; G-SPIRIT Study Group; Gifu Daigaku Igakubu Daigakuin Igaku Kenkyuka Seikei Gekagaku, Department of Orthopedic Surgery<br/>         Nozawa, Satoshi; G-SPIRIT Study Group; Gifu Daigaku Igakubu Daigakuin Igaku Kenkyuka Seikei Gekagaku, Department of Orthopedic Surgery<br/>         Iwai, Chizuo; G-SPIRIT Study Group; Gifu Daigaku Igakubu Daigakuin Igaku Kenkyuka Seikei Gekagaku, Department of Orthopedic Surgery<br/>         Taguchi, Toshihiko; G-SPIRIT Study Group; Yamaguchi Daigaku Igakubu Daigakuin Igakukei Kenkyuka Seikei Gekagaku, Department of Orthopedic Surgery<br/>         Kanchiku, Tsukasa; G-SPIRIT Study Group; Yamaguchi Daigaku Igakubu Daigakuin Igakukei Kenkyuka Seikei Gekagaku, Department of Orthopedic Surgery<br/>         Suzuki, Hidenori; G-SPIRIT Study Group; Yamaguchi Daigaku Igakubu Daigakuin Igakukei Kenkyuka Seikei Gekagaku, Department of Orthopedic Surgery<br/>         Nishida, Norihiro; G-SPIRIT Study Group; Yamaguchi Daigaku Igakubu Daigakuin Igakukei Kenkyuka Seikei Gekagaku, Department of Orthopedic Surgery<br/>         Funaba, Masahiro; G-SPIRIT Study Group; Yamaguchi Daigaku Igakubu Daigakuin Igakukei Kenkyuka Seikei Gekagaku, Department of Orthopedic Surgery<br/>         Yamazaki, Masashi; G-SPIRIT Study Group; University of Tsukuba, Department of Orthopedic Surgery</p> |
| <b>Primary Subject Heading</b>: | Neurology                                                                                                                                                                                                                                                                                                                                                                                                                                                                                                                                                                                                                                                                                                                                                                                                                                                                                                                                                                                                                                                                                                                                                                                                                                                                                                                                                                                                                                                                                                                                                                                                                                                                                                                                                                                                                                                                                                                                                                                                                                                                                                                                                                                                                                                                                                                                                                                                     |
| Secondary Subject Heading:      | Medical management                                                                                                                                                                                                                                                                                                                                                                                                                                                                                                                                                                                                                                                                                                                                                                                                                                                                                                                                                                                                                                                                                                                                                                                                                                                                                                                                                                                                                                                                                                                                                                                                                                                                                                                                                                                                                                                                                                                                                                                                                                                                                                                                                                                                                                                                                                                                                                                            |
| Keywords:                       | Neurological injury < NEUROLOGY, Spine < ORTHOPAEDIC & TRAUMA SURGERY, Clinical trials < THERAPEUTICS                                                                                                                                                                                                                                                                                                                                                                                                                                                                                                                                                                                                                                                                                                                                                                                                                                                                                                                                                                                                                                                                                                                                                                                                                                                                                                                                                                                                                                                                                                                                                                                                                                                                                                                                                                                                                                                                                                                                                                                                                                                                                                                                                                                                                                                                                                         |
|                                 |                                                                                                                                                                                                                                                                                                                                                                                                                                                                                                                                                                                                                                                                                                                                                                                                                                                                                                                                                                                                                                                                                                                                                                                                                                                                                                                                                                                                                                                                                                                                                                                                                                                                                                                                                                                                                                                                                                                                                                                                                                                                                                                                                                                                                                                                                                                                                                                                               |

SCHOLARONE™  
 Manuscripts

1  
2  
3  
4  
5  
6 **Study Protocol for the G-SPIRIT trial: A Randomized, Placebo-Controlled,**  
7 **Double-blinded Phase 3 Trial of Granulocyte Colony Stimulating Factor-Mediated**  
8 **Neuroprotection for Acute Spinal Cord Injury**  
9

10 Corresponding Author: Masao Koda

11 1-1-1 Tennodai, Tsukuba City, Ibaraki 3058575, Japan

12 e-mail: [masaokod@gmail.com](mailto:masaokod@gmail.com), tel: 81-29-853-3219  
13  
14  
15

16  
17 Authors: Masao Koda<sup>1,2</sup>, Hideki Hanaoka<sup>1,3</sup>, Takatoshi Sato<sup>1,3</sup>, Yasuhisa Fujii<sup>1,3</sup>, Michiko  
18 Hanawa<sup>1,3</sup>, Sho Takahashi<sup>1,3</sup>, Takeo Furuya<sup>1,4</sup>, Yasushi Ijima<sup>1,4</sup>, Junya Saito<sup>1,4</sup>, Mitsuhiro  
19 Kitamura<sup>1,4</sup>, Seiji Ohtori<sup>1,4</sup>, Yukei Matsumoto<sup>1,2</sup>, Tetsuya Abe<sup>1,2</sup>, Kei Watanabe<sup>1,5</sup>, Toru  
20 Hirano<sup>1,5</sup>, Masayuki Ohashi<sup>1,5</sup>, Hirokazu Shoji<sup>1,5</sup>, Tatsuki Mizouchi<sup>1,5</sup>, Ikuko Takahashi<sup>1,5</sup>,  
21 Norio Kawahara<sup>1,6</sup>, Masahito Kawaguchi<sup>1,6</sup>, Yugo Orita<sup>1,6</sup>, Takeshi Sasamoto<sup>1,6</sup>, Masahito  
22 Yoshioka<sup>1,6</sup>, Masafumi Fujii<sup>1,6</sup>, Katsutaka Yonezawa<sup>1,6</sup>, Daisuke Soma<sup>1,6</sup>, Hiroshi  
23 Taneichi<sup>1,7</sup>, Daisaku Takeuchi<sup>1,7</sup>, Satoshi Inami<sup>1,7</sup>, Hiroshi Moridaira<sup>1,7</sup>, Haruki Ueda<sup>1,7</sup>,  
24 Futoshi Asano<sup>1,7</sup>, Yosuke Shibao<sup>1,7</sup>, Ikuo Aita<sup>1,8</sup>, Yosuke Takeuchi<sup>1,8</sup>, Masaya Mimura<sup>1,9</sup>,  
25 Jun Shimbo<sup>1,9</sup>, Yukio Someya<sup>1,9</sup>, Sumio Ikenoue<sup>1,9</sup>, Hiroaki Sameda<sup>1,9</sup>, Kan Takase<sup>1,9</sup>,  
26 Yoshikazu Ikeda<sup>1,10</sup>, Fumitake Nakajima<sup>1,10</sup>, Mitsuhiro Hashimoto<sup>1,10</sup>, Tomoyuki Ozawa<sup>1,10</sup>,  
27 Fumio Hasue<sup>1,11</sup>, Takayuki Fujiyoshi<sup>1,11</sup>, Koshiro Kamiya<sup>1,11</sup>, Masahiko Watanabe<sup>1,12</sup>,  
28 Hiroyuki Katoh<sup>1,12</sup>, Yukihiro Matsuyama<sup>1,13</sup>, Yu Yamamoto<sup>1,13</sup>, Daisuke Togawa<sup>1,13</sup>,  
29 Tomohiko Hasegawa<sup>1,13</sup>, Sho Kobayashi<sup>1,13</sup>, Go Yoshida<sup>1,13</sup>, Shin Oe<sup>1,13</sup>, Tomohiro  
30 Banno<sup>1,13</sup>, Hideyuki Arima<sup>1,13</sup>, Koji Akeda<sup>1,14</sup>, Eiji Kawamoto<sup>1,14</sup>, Hiroshi Imai<sup>1,14</sup>,  
31 Toshihiko Sakakibara<sup>1,14</sup>, Akihiro Sudo<sup>1,14</sup>, Yasuo Ito<sup>1,15</sup>, Tsuyoshi Kikuchi<sup>1,15</sup>, Shuhei  
32 Osaki<sup>1,15</sup>, Nobuhiro Tanaka<sup>1,16</sup>, Kazuyoshi Nakanishi<sup>1,16</sup>, Naosuke Kamei<sup>1,16</sup>, Shinji  
33 Kotaka<sup>1,16</sup>, Hideo Baba<sup>1,17</sup>, Tsuyoshi Okudaira<sup>1,17</sup>, Hiroaki Konishi<sup>1,17</sup>, Takayuki  
34 Yamaguchi<sup>1,17</sup>, Keigo Ito<sup>1,18</sup>, Yoshito Katayama<sup>1,18</sup>, Taro Matsumoto<sup>1,18</sup>, Tomohiro  
35 Matsumoto<sup>1,18</sup>, Masaru Idota<sup>1,18</sup>, Haruo Kanno<sup>1,19</sup>, Toshimi Aizawa<sup>1,19</sup>, Ko Hashimoto<sup>1,19</sup>,  
36 Toshimitsu Eto<sup>1,19</sup>, Takehiro Sugaya<sup>1,19</sup>, Michiharu Matsuda<sup>1,19</sup>, Kazunari Fushimi<sup>1,20</sup>,  
37 Satoshi Nozawa<sup>1,20</sup>, Chizuo Iwai<sup>1,20</sup>, Toshihiko Taguchi<sup>1,21</sup>, Tsukasa Kanchiku<sup>1,21</sup>, Hidenori  
38 Suzuki<sup>1,21</sup>, Norihiro Nishida<sup>1,21</sup>, Masahiro Funaba<sup>1,21</sup>, Masashi Yamazaki<sup>1,2</sup>  
39  
40  
41  
42  
43  
44  
45  
46  
47  
48  
49  
50  
51  
52  
53  
54  
55  
56  
57  
58  
59  
60

1  
2  
3  
4  
5 Affiliations  
6

7 <sup>1</sup>G-SPIRIT Study Group is consisted by Nineteen major hospitals in Japan constituting the  
8 G-SPIRIT study group  
9

10 <sup>2</sup>Department of Orthopedic Surgery, University of Tsukuba, Ibaraki

11 <sup>3</sup>Clinical Research Center, Chiba University Hospital, Chiba

12 <sup>4</sup>Department of Orthopedic Surgery, Chiba University Graduate School of Medicine, Chiba

13 <sup>5</sup>Department of Orthopedic Surgery, Niigata University Graduate School of Medicine and  
14 Dental Sciences, Niigata  
15

16 <sup>6</sup>Department of Orthopedic Surgery, Kanazawa Medical University, Ishikawa

17 <sup>7</sup>Department of Orthopedic Surgery, Dokkyo Medical University, Tochigi

18 <sup>8</sup>Department of Orthopedic Surgery, Tsukuba Medical Center, Ibaraki

19 <sup>9</sup>Department of Orthopedic Surgery, Funabashi Municipal Medical Center, Chiba

20 <sup>10</sup>Department of Orthopedic Surgery, Chiba Rosai Hospital, Chiba

21 <sup>11</sup>Department of Orthopedic Surgery, Kimitsu Chuo Hospital, Chiba

22 <sup>12</sup>Department of Orthopedic Surgery, Tokai University School of Medicine, Kanagawa

23 <sup>13</sup>Department of Orthopedic Surgery, Hamamatsu University School of Medicine, Shizuoka

24 <sup>14</sup>Department of Orthopedic Surgery, Graduate School of Medicine, Mie University, Mie

25 <sup>15</sup>Department of Orthopedic Surgery, Kobe Red Cross Hospital, Hyogo

26 <sup>16</sup>Department of Orthopedic Surgery, Graduate School of Biomedical Sciences, Hiroshima  
27 University, Hiroshima  
28

29 <sup>17</sup>Department of Orthopedic Surgery, Nagasaki Rosai Hospital, Nagasaki

30 <sup>18</sup>Department of Orthopedic Surgery, Chubu Rosai Hospital, Aichi

31 <sup>19</sup>Department of Orthopedic Surgery, Tohoku University School of Medicine, Miyagi

32 <sup>20</sup>Department of Orthopedic Surgery, Gifu University School of Medicine, Gifu

33 <sup>21</sup>Department of Orthopedic Surgery, Yamaguchi University Graduate School of Medicine,  
34 Yamaguchi  
35

36  
37  
38  
39  
40  
41  
42  
43  
44  
45  
46  
47  
48  
49  
50  
51  
52 Word Count: 2516  
53  
54  
55  
56  
57

## Abstract

**Introduction:** Granulocyte Colony Stimulating Factor (G-CSF) is generally used for neutropenia. Previous experimental studies revealed that G-CSF promoted neurological recovery after spinal cord injury (SCI). Next we moved to early phase of clinical trials. In a phase 1/2a trial, no adverse events were observed. Next, we conducted a non-randomized, non-blinded, comparative trial, which suggested the efficacy of G-CSF for promoting neurological recovery. Based on those results, we are now performing a phase 3 trial.

**Methods and Analysis:** The objective of this study is to evaluate the efficacy of G-CSF for acute SCI. The study design is a prospective, multicenter, randomized, double-blinded, placebo-controlled comparative study. The current trial includes cervical SCI (severity of American Spinal Injury Association (ASIA) Impairment Scale B/C) within 48 hours after injury. Patients are randomly assigned to G-CSF and placebo groups. The G-CSF group is administered 400  $\mu\text{g}/\text{m}^2/\text{d}\times 5\text{d}$  of G-CSF in normal saline via intravenous infusion for 5 consecutive days. The placebo group is similarly administered a placebo. Our primary endpoint is changes in ASIA motor scores from baseline to 3 months. Each group includes 44 patients (88 total patients). This trial is funded by the Center for Clinical Trials, Japan Medical Association.

**Ethics and Dissemination:** The study was approved by the Institutional Review Board of each institution and will be conducted according to the principles of the World Medical Association Declaration of Helsinki and in accordance with the Japanese Medical Research Involving Human Subjects Act and other guidelines, regulations and Acts. Results of the clinical study will be submitted to the head of the respective clinical study site as a report after conclusion of the clinical study by the sponsor-investigator. Even if the results are not favorable despite conducting the clinical study properly, the data will be published as a paper.

**Registration:** UMIN000018752

<https://upload.umin.ac.jp/cgi-open-bin/ctr/ctr.cgi?function=brows&action=brows&type=summary&recptno=R000021694&language=J>

## Strengths and Limitations of This Study

### *Strengths*

- ✓ Novel drug therapy for acute spinal cord injury is much-needed.
- ✓ Randomized, placebo-controlled, double-blinded design can eliminate bias.

### *Limitations*

- ✓ Acute spinal cord injury patients are difficult to recruit to the trial.
- ✓ Patient's neurological status in acute phase is unstable, possibly resulting in dispersion of the patient's background.
- ✓ Concealment must be performed very strictly because G-CSF apparently increases

1  
2  
3  
4  
5 white blood cell count.  
6

## 7 **Introduction**

8  
9 Spinal cord injury (SCI) is a devastating injury by which the patient can suffer from  
10 long-lasting severe sequelae including palsy of extremities, sensory disturbance,  
11 bowel/bladder/sexual dysfunction, and neuropathic pain. Conceptually, SCI is divided into  
12 two chronological phases: a primary and a secondary phase. Primary injury is mechanical  
13 damage to spinal cord tissue itself caused by fracture and/or dislocation or compression.  
14 Secondary injury is triggered by the primary injury and is a biological reaction of the spinal  
15 cord, which includes ischemia, hemorrhage, excitotoxicity, hyperpermeability, and  
16 inflammation<sup>1</sup>. Because secondary injury can be the main target of treatment, extensive  
17 laboratory and clinical investigation of neuroprotection is needed to manage secondary  
18 injury<sup>2</sup>.  
19  
20  
21  
22  
23  
24  
25

26 To date, the only approved neuroprotective therapy for SCI is massive  
27 methylprednisolone sodium succinate (MPSS) therapy based on the NASCIS 2 study<sup>3</sup>.  
28 However, recent reports revealed that MPSS shows only a modest effect for SCI. In  
29 addition, several reports have described adverse events induced by MPSS for SCI including  
30 infections (pneumonia, urinary tract infection) and gastrointestinal disorders (gastric ulcer,  
31 etc.)<sup>4</sup>. Therefore, the use of MPSS for SCI has become controversial<sup>5</sup>. Accordingly, a new  
32 therapeutic drug for SCI is desirable.  
33  
34  
35  
36  
37

38 Granulocyte colony-stimulating factor (G-CSF, generic name: filgrastim) is a growth  
39 factor that affects the hematopoietic system, promoting differentiation, proliferation, and  
40 survival of granulocytes<sup>6</sup>. Clinically, in Japan, G-CSF is administered to patients with  
41 leukopenia, and to peripheral stem cell transplantation donors, G-CSF is administered to  
42 mobilize hematopoietic stem cells into the peripheral blood<sup>7</sup>. In the central nervous system,  
43 G-CSF has properties to mobilize the movement of bone marrow cells into the brain<sup>8</sup> and  
44 spine, and in a stroke model, has shown neuroprotective properties<sup>9</sup>. In other countries,  
45 clinical studies of the effects of G-CSF in cerebral infarction have been reported<sup>10</sup>.  
46  
47  
48  
49  
50  
51

52 To prove the hypothesis that G-CSF has neuroprotective properties against SCI, G-CSF  
53 was administered to rat and mouse animal models of spinal cord injury, and hind limb  
54  
55  
56  
57

1  
2  
3  
4  
5  
6 function improved significantly after administration of G-CSF. Further investigations into  
7 the mechanism of action of G-CSF in SCI were conducted. Data obtained to date identify  
8 the following properties of G-CSF: [1] mobilization of bone marrow-derived stem cells  
9 causing their biointegration at the site of SCI<sup>11</sup>, [2] direct inhibition of nerve cell death<sup>12</sup>,  
10 [3] protection of the myelin sheath by inhibiting oligodendrocyte cell death<sup>13</sup>, [4] inhibition  
11 of inflammatory cytokine expression (TNF- $\alpha$ , IL-1 $\beta$ )<sup>13</sup>, and [5] promotion of  
12 neovascularization<sup>14</sup>. These properties suggest that G-CSF has a neuroprotective effect in  
13 acute SCI.  
14  
15

16  
17  
18  
19 Based on these properties, a phase 1/2a clinical study was conducted where the main  
20 objective was to confirm the safety and feasibility of G-CSF for treatment of patients with  
21 acute SCI<sup>15</sup>. This study was an open-label, dose-titrating study with no control group. As  
22 the initial step, 5 patients were given 5  $\mu\text{g}/\text{kg}/\text{day}$  of G-CSF for 5 consecutive days by i.v.  
23 infusion, and as the second step, 11 patients were given 10  $\mu\text{g}/\text{kg}/\text{day}$  of G-CSF for 5  
24 consecutive days by i.v. infusion. No serious adverse events were noted, and the safety of  
25 G-CSF administration in patients with acute SCI was confirmed<sup>15</sup>.  
26  
27  
28  
29  
30

31 As a next step, to validate the efficacy of G-CSF in neuroprotective treatment, a  
32 multicenter, prospective, nonrandomized, nonblinded, comparative control study (phase 2b  
33 clinical trial) was conducted<sup>16</sup>. Based on the results of the previous phase 1/2a clinical trial,  
34 the dosage and duration of treatment with G-CSF in this study was 10  $\mu\text{g}/\text{kg}/\text{day}$  for 5  
35 consecutive days. Patients with acute cervical SCI (within 48 h of injury) were registered in  
36 the clinical trial and allocated to either the G-CSF group (G-CSF 10  $\mu\text{g}/\text{kg}/\text{day} \times 5$  days i.v.  
37 infusion) or control group (no G-CSF administration) at each treatment facility. A total of  
38 19 patients in the G-CSF group and 26 patients in the control group were observed for 3  
39 months or longer. American Spinal Injury Association (ASIA) motor score (motor: 0 to 100  
40 points) was compared between the groups. ASIA motor scores were  $26.1 \pm 18.9$  in the  
41 G-CSF group and  $12.2 \pm 14.7$  in the control group showing a significant improvement of  
42 motor paralysis in the G-CSF group ( $p < 0.01$ ). In addition, in cases that could be followed  
43 for 1 year or longer, a significant improvement of ASIA motor score was observed in the  
44 G-CSF group<sup>16</sup>.  
45  
46  
47  
48  
49  
50  
51  
52  
53  
54  
55  
56  
57  
58  
59  
60

1  
2  
3  
4  
5 Based on results of these preclinical and early phase clinical trials, we are now  
6 conducting a phase 3 trial.  
7  
8  
9

### 10 *Specific Objective*

11 The objective of this study is to evaluate the efficacy of G-CSF for improving motor  
12 paralysis in acute SCI.  
13  
14  
15

## 16 **Methods and Analysis**

### 17 *Design of the study*

18 The study design of the current trial is a prospective, multicenter, randomized,  
19 double-blinded, placebo-controlled comparative study.  
20  
21  
22  
23  
24  
25

### 26 *Study Procedures*

27 The study outline is shown in Figure. Patients will be randomly assigned to G-CSF and  
28 placebo groups. A central registration system will be used for dynamic randomization into  
29 the investigational treatment group (G-CSF) and control group (placebo) based on age at  
30 registration (16–64 years of age, or 65–84 years of age) and severity of paralysis (AIS B or  
31 C) at 48 h after injury. Initially, screened patients with severity AIS B/C will be tentatively  
32 enrolled. Initial screening of the patients include clinical laboratory test, imaging studies  
33 including X-ray, magnetic resonance imaging and computed tomography, and  
34 neurological/functional evaluations.  
35  
36  
37  
38  
39  
40

41 Neurological re-assessment will be performed 48±4 hours after SCI and the patients  
42 who will recover to severity AIS D will be excluded. The patients with severity AIS B/C at  
43 neurological re-assessment 48±4 hours after SCI will be enrolled and randomly allocated to  
44 either the investigational treatment group (G-CSF) or control group (placebo) in a 1 to 1  
45 ratio. The subject registration center uses a program based on an appropriate computer  
46 algorithm to allocate patients into groups. The first dose of investigative drugs will be  
47 administered to the patients after re-assessment of neurological status and enrollment 48±4  
48 hours after SCI.  
49  
50  
51  
52  
53  
54  
55  
56  
57

1  
2  
3  
4  
5  
6 The G-CSF group will be administered  $400 \mu\text{g}/\text{m}^2/\text{d} \times 5\text{d}$  of G-CSF in normal saline via  
7 intravenous infusion for 5 consecutive days. The placebo group will be similarly  
8 administered a placebo. The first dose of investigative drugs will be administered to the  
9 patients  $48 \pm 4$  hours after SCI. The dosing schedule will be once a day in every morning  
10 (9-10 AM) for consecutive 5 days even in case that the first dosing was performed at night  
11 because of restriction on practices. Investigational drugs including both G-CSF and placebo  
12 will be stored in refrigerator which will be kept between  $1-6^\circ\text{C}$  and has temperature-logger  
13 in pharmacies in each participating institutes. The investigational drugs is packaged in  
14 ample with label only printed as serial numbers, ten ample is packed in one box with label  
15 only printed serial numbers. Web-based allocation system will show the serial number of  
16 investigational drug which must be used to respective patients to ensure blinding.  
17  
18  
19  
20  
21  
22  
23

24 We decided dosage of drug based on our previous non-randomized early phase clinical  
25 studies. On phase 1/2a clinical study, of which study design was open-label, dose-titrating  
26 study with no control group, SCI patients who were administered  $10 \mu\text{g}/\text{kg}/\text{day}$  G-CSF  
27 for 5 days showed marked elevation of white blood cell number (reached nearly  $50000/\mu\text{l}$ ,  
28 of which WBC number might cause adverse effects of G-CSF) during G-CSF  
29 administration<sup>15</sup>. Therefore we decided to withdraw additional titration. In addition, next  
30 phase of clinical study, of which design was multicenter, prospective, nonrandomized,  
31 nonblinded, comparative control study, showed suggestive efficacy of G-CSF ( $10 \mu\text{g}/\text{kg}/\text{d}$   
32 for 5 days) for acute SCI<sup>16</sup>. Based on those results, we finally decided the dosage of G-CSF  
33 as  $10 \mu\text{g}/\text{kg}/\text{d} \times 5\text{d}$  for 5 days. In the current clinical trial, the dosage of G-CSF is written as  
34  $400 \mu\text{g}/\text{m}^2/\text{d}$  ( $= 10 \mu\text{g}/\text{kg}/\text{d}$ ) according to the Japanese Pharmaceutical and Medical Device  
35 Agency (PMDA)'s instruction for consolidation with product labeling.  
36  
37  
38  
39  
40  
41  
42  
43  
44  
45

46 We decided to 48hours after SCI as the therapeutic time window because our previous  
47 multicenter, prospective, nonrandomized, nonblinded, comparative control study, which  
48 recruited SCI patients within 48 hours after injury, showed that there was no significant  
49 difference in neurological outcome between the patient administered G-CSF very early  
50 after the injury and 48 hours after injury<sup>16</sup>.  
51  
52  
53

54 Allocation will be concealed between blinded evaluators of efficacy/safety and those  
55  
56  
57



1  
2  
3  
4  
5 for laboratory data, as G-CSF markedly increases white blood cell counts that can reveal  
6 patient treatment.  
7

8  
9 Our primary endpoint is changes in ASIA motor scores (international standards for  
10 neurological classification of spinal cord injury (ISNSCI) suppl. Figure 1) from baseline to  
11 3 months calculated as follows: 3-month ASIA motor score change = 3-month ASIA motor  
12 score – pretreatment ASIA motor score. To maintain consistency of neurological  
13 assessment among the each evaluators, attending lecture and e-learning (in website of  
14 International Spinal Cord Society: <http://www.elearnsoci.org/>) of ASIA/ISNSCI scoring  
15 system is mandatory for every investigators participating to the present trial.  
16  
17  
18  
19  
20

21 Secondary endpoints are as follows. [1] Change in ASIA motor scores at 6 months and  
22 12 months after G-CSF administration compared with pretreatment. [2] Changes in sensory  
23 paralysis over time: change in ASIA sensory scores at 3 months, 6 months, and 12 months  
24 after G-CSF administration compared with pretreatment. [3] Severity of functional  
25 compromise because of paralysis: AIS before administration and at 3, 6, and 12 months  
26 after administration of G-CSF. [4] Percentage of responders: percentage of patients whose  
27 AIS improved by 1 grade or more at 3, 6, and 12 months after administration compared  
28 with before administration of G-CSF. [5] Neurological level of injury (NLI): percentage of  
29 patients whose NLI decreased by 1 grade or more at 3, 6, or 12 months after administration  
30 of G-CSF compared with pretreatment. [6] SCIM: change in SCIM scores at 3, 6, and 12  
31 months after G-CSF administration compared with pretreatment [7] EQ-5D: measured  
32 EQ-5D efficacy scores at 3, 6, and 12 months after G-CSF.  
33  
34  
35  
36  
37  
38  
39  
40  
41

42 To strengthen the analysis, more strict blindness of assessment by the evaluator for  
43 outcome measures is ideal. Therefore every prior score/measurement should be blinded  
44 and/or not the same person should assess every midpoint motor/sensory functional  
45 measurement. However, PMDA instructed us to assess one patients' functional evaluation  
46 by one evaluator for consistent assessment in respective patients. PMDA considers the  
47 consistency of assessment in respective patients is more important.  
48  
49  
50  
51

52 The precise explanation of abovementioned outcome measures is as followings (suppl.  
53 Figures). ASIA motor score is determined by examining a key muscle function within each  
54  
55  
56  
57  
58  
59  
60

1  
2  
3  
4  
5 of 10 myotomes on each side of the body on manual muscle testing (MMT) in the supine  
6 position. There is a range of score from 0 to 25 for each extremity, totaling 0 to 50 for the  
7 upper limbs and 0 to 50 for the lower limbs, resulting in total of ASIA motor score ranges  
8 from 0 to 100. This score can reflect the degree of motor impairment associated with the  
9 SCI (suppl. Figure 1). ASIA sensory scores is completed through the testing of a key point  
10 in each of the 28 dermatomes (from C2 to S4-5) on the right and left sides of the body that  
11 can be readily located in relation to bony anatomical landmarks. At each of these key points,  
12 two aspects of sensation are examined: light touch and pin prick. Appreciation of light  
13 touch and pin prick sensation at each of the key points is separately scored on a three-point  
14 scale, with comparison to the sensation on the patients' cheek as a normal frame of  
15 reference: 0 = absent, 1 = altered, 2 = normal or intact. As a result, ASIA sensory scores  
16 range from 0 to 112 (suppl. Figure 1). AIS designation is used in grading the degree of  
17 impairment: A = Complete. No sensory or motor function is preserved in the sacral  
18 segments S4-S5. B = Sensory incomplete. Sensory but not motor function is preserved  
19 below the neurological level. C = Motor incomplete. Motor function is preserved below the  
20 neurological level, and more than half of key muscle functions below the single  
21 neurological level of injury have a muscle grade less than 3 (Grades 0–2). D = Motor  
22 incomplete. Motor function is preserved below the neurological level, and at least half (half  
23 or more) of key muscle functions below the neurological level have a muscle grade >3.  
24 E = Normal. If sensation and motor function as tested are graded as normal in all segments,  
25 and the patient had prior deficits, then the AIS grade is E (suppl. Figure 1, footnote). NLI  
26 refers to the most caudal segment of the cord with intact sensation and antigravity muscle  
27 function strength, provided that there is normal (intact) sensory and motor function rostrally  
28 (suppl. Figure 1, footnote). SCIM is disability scale developed specifically for patients with  
29 spinal cord lesions in order to make the functional assessments of patients with paraplegia  
30 or tetraplegia more sensitive to changes. The SCIM includes the following areas of  
31 function: self-care (subscore (0-20), respiration and sphincter management (0-40) and  
32 mobility (0-40). Each area is scored according to its proportional weight in these patients'  
33 general activity. The final score ranges from 0 to 100 (suppl. Figure 2-4). EQ-5D  
34  
35  
36  
37  
38  
39  
40  
41  
42  
43  
44  
45  
46  
47  
48  
49  
50  
51  
52  
53  
54  
55  
56  
57  
58  
59  
60

1  
2  
3  
4  
5 essentially consists of 2 pages (suppl. Figure 5, 6): the EQ-5D descriptive system and the  
6 EQ visual analogue scale (EQ VAS). The descriptive system comprises five dimensions:  
7 mobility, self-care, usual activities, pain/discomfort and anxiety/depression. Each  
8 dimension has 5 levels: no problems, slight problems, moderate problems, severe problems  
9 and extreme problems. The patient is asked to indicate his/her health state by ticking the  
10 box next to the most appropriate statement in each of the five dimensions. This decision  
11 results in a 1-digit number that expresses the level selected for that dimension. The digits  
12 for the five dimensions can be combined into a 5-digit number that describes the patient's  
13 health state and can be converted to efficacy score with calibration scale (ranges -0.111 to  
14 1.000). The EQ VAS records the patient's self-rated health on a vertical visual analogue  
15 scale, where the endpoints are labelled 'The best health you can imagine' and 'The worst  
16 health you can imagine'. The VAS can be used as a quantitative measure of health outcome  
17 that reflect the patient's own judgement.  
18  
19  
20  
21  
22  
23  
24  
25  
26  
27  
28

29 Each group will include 44 patients (88 patients in total). Our protocol was approved by  
30 PMDA and this trial will be funded by the Center for Clinical Trials, Japan Medical  
31 Association.  
32  
33  
34  
35  
36

### 37 *Inclusion*

38  
39 Inclusion criteria are as follows. [1] Patients with cervical SCI (severity of AIS B/C)  
40 within 48 h of injury. [2] Patients reassessed for neurological status at 48 h after injury, and  
41 those whose palsy is AIS B/C will be enrolled. [3] Patients with neurological level of injury  
42 between C4 and C7. [4] Patients with age of 16 to 85 years. [5] Patients who agree to  
43 participate in the current trial and from whom informed consent was obtained orally and in  
44 writing. [6] Patients who can be followed up for 12 months after SCI.  
45  
46  
47  
48  
49  
50

### 51 *Exclusion*

52  
53 Exclusion criteria are as follows. [1] Patients with neurological recovery to AIS D at  
54 neurological reassessment 48 h after SCI, because only AIS B/C patients will be included to  
55  
56  
57

1  
2  
3  
4  
5  
6  
7  
8  
9  
10  
11  
12  
13  
14  
15  
16  
17  
18  
19  
20  
21  
22  
23  
24  
25  
26  
27  
28  
29  
30  
31  
32  
33  
34  
35  
36  
37  
38  
39  
40  
41  
42  
43  
44  
45  
46  
47  
48  
49  
50  
51  
52  
53  
54  
55  
56  
57  
58  
59  
60

standardize the severity of paresis in order to stratify the patients at the initiation of drug administration. [2] Allergy to G-CSF. [3] Hematological malignancy, [4] within 6 months after invasive coronary intervention, [5] splenomegaly, or [6] pregnancy, [7] consciousness impairment, [8] neurological disorders that can affect neurological evaluation in the present trial, [9] fracture of extremities that can affect the neurological evaluation and [10] massive dose administration of MPSS. Exclusion criteria 2 - 6 are set for safety, criteria 1, 7 - 9 are set to maintain homogeneity of the patient population enrolled, criteria 7-9 are set for maintenance of accuracy of functional assessment, criteria 7 is set to obtain patients' own informed consent upon participation to the trial and criteria 10 is set to omit the possible interference of MPSS on outcome assessment.

### *Concealment*

Patients will be administered drug or placebo and be evaluated in a double-blinded manner. An evaluator blinded to the treatment will take charge of patient evaluation including clinical findings and paresis, without laboratory data because G-CSF induces an apparent increase of white blood cell count that makes it easy to distinguish G-CSF and placebo treatment. Therefore, a non-blinded evaluator for laboratory data will be assigned to evaluate laboratory data alone. From a safety point-of view, the dose of G-CSF will be modulated according to excessive increase of white blood cell count. Therefore, a non-blinded evaluator will instruct the pharmacy to modulate the dose of G-CSF based on white blood cell count.

### *Sample Size Calculation*

The target sample size for this randomized trial is 88. This number is based on the results of previous clinical trials<sup>16</sup>. The estimated group difference ( $\pm$  standard deviation) of change in ASIA motor scores from baseline to 3 months is 13.9 ( $\pm$  21.9). A sample size of 44 patients in each group will provide 80% power to detect a difference of the change in ASIA motor scores between the G-CSF and the placebo treatments, using a mixed-effects models for repeated measures (MMRM) at a two-sided 5% level of significance. A

1  
2  
3  
4  
5 common correlation of 0.25 at each time point is assumed. A dropout rate of 10% is  
6 allowed. Thus, the total sample size of 88 patients is required for the trial.  
7  
8  
9

### 10 *Statistical analyses*

11  
12 The analyses of the primary and secondary end points will be performed as  
13 intention-to-treat analyses in a full analysis set, which includes all patients who: (1) took at  
14 least one course of treatment during the study; (2) do not present any serious violation of  
15 the study protocol; and (3) have data collected after commencement of treatment. For the  
16 baseline characteristics, summary statistics will comprise frequencies and proportions for  
17 categorical variables, and means and SDs for continuous variables. The patient  
18 characteristics will be compared using a chi-square test for categorical variables, and a *t* test  
19 or Wilcoxon rank sum test for continuous variables. Missing data including loss to  
20 follow-up and missing measurement will be supplemented with MMRM.  
21  
22  
23  
24  
25  
26  
27

28 For the primary analysis, aimed at comparing treatment effects, a change in ASIA motor  
29 score from baseline to 3 months and its 95% confidence interval (CI) will be estimated  
30 using the MMRM. To test for significant association of the primary endpoint, a mixed  
31 effects model for repeated measures with an unstructured covariance matrix will be applied  
32 to adjust for age (<65 years or ≥65 years) and AIS at 48 h after the injury (B or C).  
33  
34  
35  
36

37 For the secondary analysis, the change in ASIA motor score will be compared using a  
38 Student *t* test and the 95% CI will be estimated. The same method will be applied to change  
39 in sensory score, SCIM, and EQ-5D. A chi-squared test will be applied to the frequencies of  
40 the responder in AIS and of the improvement in NLI. The frequency of AIS will be  
41 summarized. The frequency of AEs will be compared using a Fisher exact test.  
42  
43  
44

45 All comparisons are planned and all *p* values will be two sided.  $p < 0.05$  will be  
46 considered significant. All statistical analyses will be performed using SAS software  
47 (version 9.4; SAS Institute, Cary, NC, USA). The statistical analysis plan will be developed  
48 by the principal investigator and the biostatistician before completion of patient recruitment  
49 and fixing of data.  
50  
51  
52  
53  
54  
55  
56  
57

### *Data Monitoring Committee*

The data monitoring committee consists of three clinical trial specialists, including a biostatistician, who are independent from the current study. The committee will meet at least 2 times per year and all the data obtained by the current trial will be checked by the committee.

### *Adverse Events*

As for safety evaluation, adverse events will be collected as follows. “Adverse events” refers to any untoward symptom or disease or signs of such (including clinical laboratory data abnormalities) in a clinical investigation subject after informed consent and does not necessarily have a causal relationship with the investigational product (G-CSF).

Increases in white blood counts will be considered an adverse event only when the count exceeds 50,000/ $\mu\text{L}$  from the perspective of a pharmacological effect of G-CSF, and any values below this will not be handled as an adverse event. Anaphylaxis and adult respiratory distress syndrome are the most representative G-CSF-related severe adverse events to be paid full attention.

All adverse events will code terminology used by the investigators according to the ICH International Medical Dictionary for Regulatory Activities Japanese version (MedDRA/J).

## **Ethics and Dissemination**

### *Ethics*

The study was approved by the Institutional Review Board (IRB) of each institutions involved to the present trial and will be conducted according to the principles of the World Medical Association (WMA) Declaration of Helsinki—Ethical Principles for Medical Research Involving Human Subjects with the amendments made in Seoul, South Korea, October 2008, with a Note of Clarification on Paragraph 29 added by the WMA General Assembly, Washington 2002; Note of Clarification on Paragraph 30 added by the WMA General Assembly, Tokyo 2004, and in accordance with the Japanese Medical Research Involving Human Subjects Act (WMO) and other guidelines, regulations and Acts.

### *Patient informed consent*

The principal investigator will try to prepare the informed consent form and other explanatory materials in as simple language as possible in order to obtain informed consent from the patient and the patient's legal representative. In case that trial participants cannot sign the informed consent form due to upper extremity palsy caused by SCI, allograph by patients' representative will be allowed.

### *Public Disclosure and Publication Policy*

Results of the clinical study will be submitted to the head of the respective clinical study site as a report after conclusion of the clinical study by the sponsor-investigator (includes study coordinating investigator). Even if the results are not favorable despite conducting the clinical study properly, the data will be published as a paper. Other sponsor-investigators (including the clinical study coordinating investigator), if they plan to publicize the data from this study in a specialized academic society conference or other external site, must first obtain permission from the other principal investigators and investigational product provider. In publicizing the results, the confidentiality of the subjects will be maintained and proofread in advance by the other sponsor-investigators (includes coordinating investigator) and investigational product provider.

### **Discussion**

The current trial is a confirmative trial to elucidate the therapeutic efficacy of G-CSF for SCI. If the current trial can successfully show significant improvement of motor paralysis of SCI by G-CSF, we will move forward to drug approval application to the Ministry for Health and Labor, Japan. The entire protocol of the current trial was approved beforehand for the initiation of the current trial by the Japanese Pharmaceutical and Medical Device Agency (PMDA). The PMDA will also permit a drug approval application if significant efficacy of G-CSF for SCI is proven.

The current trial is an important milestone for SCI clinics and research to explore

1  
2  
3  
4  
5 G-CSF for SCI.  
6  
7

8  
9 *Trial Status*

10 The present trial is now on-going.

11  
12 *Trial Sites*

13  
14 Nineteen major hospitals in Japan constituting the G-SPIRIT study group as follows:  
15 Tohoku University Hospital, Miyagi; Niigata University, Niigata; Dokkyo University  
16 Hospital, Tochigi; Tsukuba University Hospital, Ibaraki; Tsukuba Medical Center, Ibaraki;  
17 Chiba University Hospital, Chiba; Funabashi Municipal Medical Center, Chiba; Kimitsu  
18 Chuo Hospital, Chiba; Chiba Rosai Hospital, Chiba; Tokai University Hospital, Kanagawa;  
19 Hamamatsu University Hospital, Shizuoka; Gifu University Hospital, Gifu; Chubu Rosai  
20 Hospital, Aichi; Mie University Hospital, Mie; Kanazawa Medical Collage, Ishikawa;  
21 Kobe Red Cross Hospital, Hyogo; Hiroshima University Hospital, Hiroshima; Yamaguchi  
22 University Hospital, Yamaguchi; and Nagasaki Rosai Hospital, Nagasaki.  
23  
24  
25  
26  
27  
28  
29  
30

31 **Funding Statement**

32 This trial is supported by Center for Clinical trials, Japan Medical Association, Japan.  
33  
34

35 **Competing Interests**

36 No authors have any competing interests to declare.  
37  
38  
39

40 **Contributorship Statement**

41 MK, TF and MY contributed to planning and conduct of the present trial and to reporting  
42 the present protocol paper. HH, TS, YF, MH and ST contributed to conception and design  
43 of the present trial protocol and to reporting the present protocol paper. YI, JS, MK, SO,  
44 YM, TA, KW, TH, MO, HS, TM, IT, NK, MK. YO, TS, MY, MF, KY, DS, HT, DT, SI,  
45 HM, HU, FA, YS, IA, YT, MM, JS, YS, SI, HS, KT, YI, FN, MH, TO, FH, TF, KK, MW,  
46 HK, YM, YY, DT, TH, SK, GY, SO, TB, HA, KA, EK, HI, TS, AS, YI, TK, SO, NT, KN,  
47 NK, SK, HB, TO, HK, TY, IK, KY, TM, TM, IM, HK, TA, KH, TE, TS, MM, KF, SN, CI,  
48 TT, TK, HS, NN and MF contributed to conducting the present trial and to acquisition of  
49  
50  
51  
52  
53  
54  
55  
56  
57



1  
2  
3  
4  
5 data.  
6  
7  
8

## 9 References

- 10 1. Oyinbo CA. Secondary injury mechanisms in traumatic spinal cord injury: a nugget  
11 of multiply cascade. *Acta Neurobiol Exp* 2011;71:281-299.
- 12 2. Karsy M, Hawryluk G. Pharmacologic Management of Acute Spinal Cord Injury.  
13 *Neurosurg Clin N Am* 2017;28:49-62. doi: 10.1016/j.nec.2016.07.002.
- 14 3. Bracken MB, Shepard MJ, Collins WF, et al. A randomized controlled trial of  
15 methylprednisolone or naloxone in the treatment of acute spinal cord injury: results  
16 of the second national acute spinal cord injury study. *N Engl J Med* 1990;322:  
17 1405-1411.
- 18 4. Matsumoto T, Tamaki T, Kawakami M, et al. Early complications of high-dose  
19 methyl-prednisolone sodium succinate treatment in the follow-up of acute cervical  
20 spinal cord injury. *Spine* 2001;26: 426-430.
- 21 5. Hurlbert RJ, Hadley, Walters BC, et al. Pharmacological Therapy for Acute Spinal  
22 cord Injury. *Neurosurgery* 2013;72: 93-105.
- 23 6. Nicola NA, Metcalf D, Matsumoto M, Johnson GR. Purification of a factor inducing  
24 differentiation in murine myelomonocytic leukemia cells. Identification as  
25 granulocyte colony-stimulating factor. *J Biol Chem* 1983;258: 9017-9023.
- 26 7. Roberts AW: G-CSF: a key regulator of neutrophil production, but that's no all!  
27 *Growth Factors* 2005;23: 33-41.
- 28 8. Kawada H, Takizawa S, Takanashi T, et al. Administration of hematopoietic  
29 cytokines in the subacute phase after cerebral infarction is effective for functional  
30 recovery facilitating proliferation of intrinsic neural stem/progenitor cells and  
31 transition of bone marrow-derived neuronal cells. *Circulation* 2006;113: 701-710.
- 32 9. Schneider A, Kruger C, Steigleder T, et al. The hematopoietic factor G-CSF is a  
33 neuronal ligand that counteracts programmed cell death and drives neurogenesis. *J*  
34 *Clin Invest* 2005;115: 2083-2098.
- 35 10. Shyu WC, Lin SZ, Lee CC, Liu DD, Li H. Granulocyte colony-stimulating factor  
36  
37  
38  
39  
40  
41  
42  
43  
44  
45  
46  
47  
48  
49  
50  
51  
52  
53  
54  
55  
56  
57  
58  
59  
60

16

- 1  
2  
3  
4  
5  
6 for acute ischemic stroke: a randomized controlled trial. *CMAJ* 2006;174: 927-933.
- 7  
8 11. Koda M, Nishio Y, Kamada T, et al. Granulocyte colony-stimulating factor  
9 (G-CSF) mobilizes bone marrow-derived cells into injured spinal cord and  
10 promotes functional recovery after compression-induced spinal cord injury in mice.  
11 *Brain Res* 2007;1149: 223-231.
- 12  
13  
14 12. Nishio Y, Koda M, Kamada T, et al. Granulocyte colony-stimulating factor  
15 (G-CSF) attenuates neuronal death and promotes functional recovery after spinal  
16 cord injury in mice. *J Neuropathol Exp Neurol* 2007;66: 724-731.
- 17  
18  
19 13. Kadota R, Koda M, Kawabe J, et al. Granulocyte colony-stimulating factor (G-CSF)  
20 protects oligodendrocyte and promotes hindlimb functional recovery after spinal cord  
21 injury in rats. *PLoS One* 2012;7:e50391.
- 22  
23  
24 14. Kawabe J, Koda M, Hashimoto M, et al. Granulocyte colony-stimulating factor  
25 (G-CSF) exerts neuroprotective effects via promoting angiogenesis after spinal cord  
26 injury in rats. *J Neurosurg Spine* 2011;15: 414-421.
- 27  
28  
29 15. Takahashi H, Yamazaki M, Okawa A, et al. Neuroprotective therapy using  
30 granulocyte colony-stimulating factor for acute spinal cord injury: a phase I/IIa  
31 clinical trial. *Eur Spine J* 2012;21:2580-2587.
- 32  
33  
34 16. Inada T, Takahashi H, Yamazaki M, et al. A multicenter prospective  
35 non-randomized controlled clinical trial to prove neurotherapeutic effects of  
36 granulocyte colony-stimulating factor (G-CSF) for acute spinal cord injury:  
37 Analyses of follow-up cases after at least one year. *Spine* 2014;39:213-219.
- 38  
39  
40  
41  
42  
43

#### 44 Figure legend

45 Schematic diagram showing trial timeline.

46  
47  
48  
49  
50  
51  
52  
53  
54  
55  
56  
57

1  
2  
3  
4  
5  
6  
7  
8  
9  
10  
11  
12  
13  
14  
15  
16  
17  
18  
19  
20  
21  
22  
23  
24  
25  
26  
27  
28  
29  
30  
31  
32  
33  
34  
35  
36  
37  
38  
39  
40  
41  
42  
43  
44  
45  
46  
47  
48  
49  
50  
51  
52  
53  
54  
55  
56  
57  
58  
59  
60

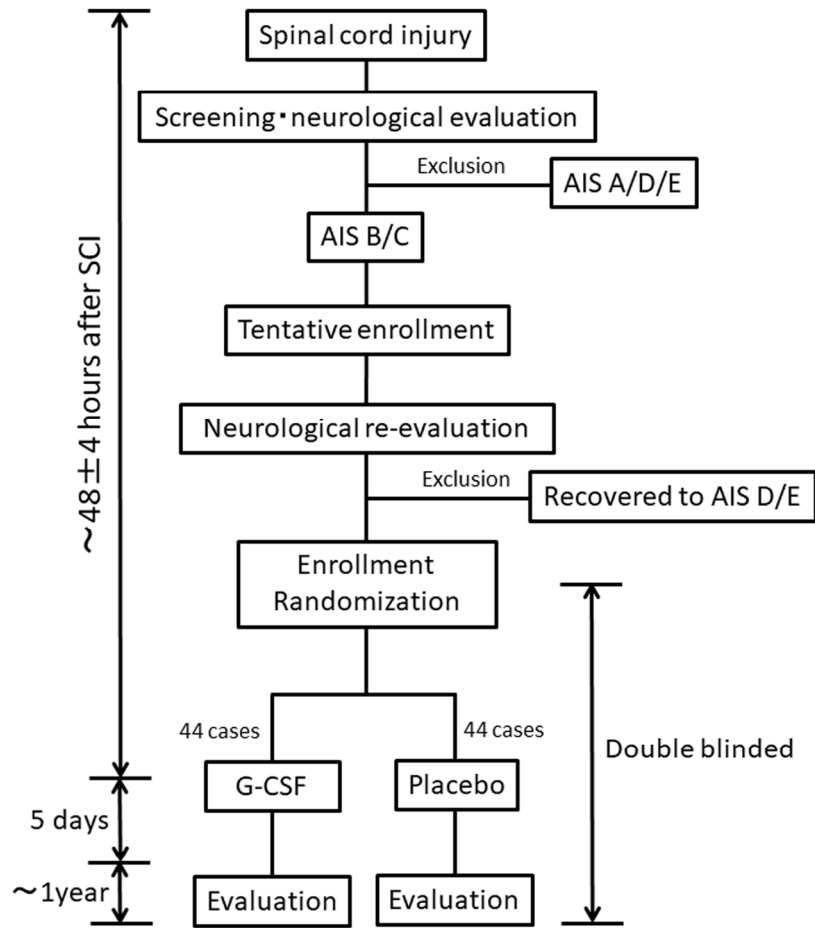

Schematic diagram showing trial timeline.

190x254mm (300 x 300 DPI)

1  
2  
3  
4  
5  
6  
7  
8  
9  
10  
11  
12  
13  
14  
15  
16  
17  
18  
19  
20  
21  
22  
23  
24  
25  
26  
27  
28  
29  
30  
31  
32  
33  
34  
35  
36  
37  
38  
39  
40  
41  
42  
43  
44  
45  
46  
47  
48  
49  
50  
51  
52  
53  
54  
55  
56  
57  
58  
59  
60

**INTERNATIONAL STANDARDS FOR NEUROLOGICAL CLASSIFICATION OF SPINAL CORD INJURY (ISNCSCI)**

**ASIA** AMERICAN SPINAL INJURY ASSOCIATION **ISCOS** INTERNATIONAL STANDARDS FOR SPINAL CORD INJURY

Patient Name \_\_\_\_\_ Date/Time of Exam \_\_\_\_\_  
 Examiner Name \_\_\_\_\_ Signature \_\_\_\_\_

**RIGHT**

**MOTOR KEY MUSCLES**

Elbow flexors C5  
 Wrist extensors C6  
 Elbow extensors C7  
 Finger flexors C8  
 Finger abductors (little finger) T1

**NER** (Upper Extremity Right)

**LER** (Lower Extremity Right)

Hip flexors L2  
 Knee extensors L3  
 Ankle dorsiflexors L4  
 Long toe extensors L5  
 Ankle plantar flexors S1

(VAC) Voluntary anal contraction (Yes/No)

**RIGHT TOTALS** (MAXIMUM) (50) (56) (56)

Key Sensory Points

**SENSORY KEY SENSORY POINTS**

Light Touch (LTR) Pin Prick (PPR)

C2  
C3  
C4  
C5  
C6  
C7  
C8  
T1  
T2  
T3  
T4  
T5  
T6  
T7  
T8  
T9  
T10  
T11  
T12  
L1  
L2  
L3  
L4  
L5  
S1  
S2  
S3  
S4-5

**SENSORY SUBSCORES**

LTR  + LTL  = LT TOTAL  (MAX (56) (56))

PPR  + PPL  = PP TOTAL  (MAX (56) (56))

**LEFT**

**MOTOR KEY MUSCLES**

Elbow flexors C5  
 Wrist extensors C6  
 Elbow extensors C7  
 Finger flexors C8  
 Finger abductors (little finger) T1

**NER** (Upper Extremity Left)

**LER** (Lower Extremity Left)

Hip flexors L2  
 Knee extensors L3  
 Ankle dorsiflexors L4  
 Long toe extensors L5  
 Ankle plantar flexors S1

(DAP) Deep anal pressure (Yes/No)

**LEFT TOTALS** (MAXIMUM) (50) (56) (56)

**MOTOR SUBSCORES**

NER  + NEL  = NEMS TOTAL  (MAX (25) (25))

LER  + LEL  = LEMS TOTAL  (MAX (25) (25))

**SENSORY SUBSCORES**

LTR  + LTL  = LT TOTAL  (MAX (56) (56))

PPR  + PPL  = PP TOTAL  (MAX (56) (56))

**NEUROLOGICAL LEVELS**

1. SENSORY  R  L

2. MOTOR  R  L

3. NEUROLOGICAL LEVEL OF INJURY (NLI)

4. COMPLETE OR INCOMPLETE?

5. ASIA IMPAIRMENT SCALE (AIS)

**ZONE OF PARTIAL PRESERVATION** (Most caudal level with any innervation)

SENSORY  R  L

MOTOR  R  L

274x206mm (300 x 300 DPI)

**セルフケア**

- (1) 食事（切る、容器を開ける、飲み物を注ぐ、食べ物を口に運ぶ、飲み物の入ったコップをもつ）
0. 静脈栄養または胃瘻が必要である、あるいは経口摂取において全介助を要する。
  1. 食べたり飲んだりすること、または補助器具の装着に部分介助を要する。
  2. 食べることは自立、補助器具を必要とするか、または食べ物を切ったり注いだりすること、容器の開閉にのみ解介助を要する。
  3. 食べることも飲むことも自立、介助や補助器具を必要としない。
- (2) 入浴（頭と体を石鹸でこすって洗い、乾かす、蛇口の開け閉め） A—上半身、B—下半身
- A.
0. 全介助を要する。
  1. 部分介助を要する。
  2. 補助器具、または特定の環境（例えば、手すりや椅子）が整っていれば、自立して体を洗う。
  3. 自立して体を洗う。（通常、健常者なら用いることのない）補助器具や特定の環境設定は不要
- B.
0. 全介助を要する。
  1. 部分介助を要する。
  2. 補助器具、または特定の環境が整っていれば、自立して体を洗う。
  3. 自立して体を洗う、補助器具や特定の環境設定は不要
- (3) 更衣（衣服、靴、常用している装具の着脱） A—上半身、B—下半身
- A.
0. 全介助を要する。
  1. ボタン、ファスナー、ひものない衣服で部分介助を要する。
  2. ボタン、ファスナー、ひものない衣服であれば自立、補助器具と特定の環境設定、またはそのどちらかが必要。
  3. ボタン、ファスナー、ひものない衣服であれば自立、補助器具も特定の環境設定も不要、ボタン、ファスナー、ひもの扱いにだけ介助、補助器具、または特定の環境設定が必要。
  - 4.（衣類の種類を問わず）自立して着替える、補助器具も特定の環境設定も不要。
- B.
0. 全介助を要する。
  1. ボタン、ファスナー、ひものない衣服で部分介助を要する。
  2. ボタン、ファスナー、ひものない衣服であれば自立、補助器具と特定の環境設定、またはそのどちらかが必要。
  3. ボタン、ファスナー、ひものない衣服であれば自立、補助器具も特定の環境設定も不要、ボタン、ファスナー、ひもの扱いにだけ介助、補助器具、または特定の環境設定が必要。
  - 4.（衣類の種類を問わず）自立して着替える、補助器具も特定の環境設定も不要。
- (4) 整容（手洗い、洗顔、歯磨き、整髪、髭剃り、化粧）
0. 全介助を要する。
  1. 部分介助を要する。
  2. 補助器具があれば自立して整容動作をおこなう。
  3. 補助器具を用いずに自立して整容動作をおこなう。

小計 (0-20)

**呼吸と排泄管理**

- (5) 呼吸
0. 気管チューブと持続的補助換気または間欠的補助換気が必要。
  2. 気管チューブを装着して自己呼吸、酸素を必要としたり、咳嗽時または気管チューブの管理に多大な介助を必要とする。
  4. 気管チューブを装着して自己呼吸、咳嗽時または気管チューブの管理に少ししか介助を必要としない。
  6. 気管チューブなしで自己呼吸、酸素、咳嗽時の多大な介助、マスク（例：終末呼吸陽圧 PEEP）、または間欠的補助換気 (BiPAP) を必要とする。
  8. 気管チューブなしで自己呼吸、介助または咳嗽刺激を少ししか必要としない。
  10. 介助も器具もなしで自己呼吸。

190x254mm (300 x 300 DPI)

1  
2  
3  
4  
5  
6  
7  
8  
9  
10  
11  
12  
13  
14  
15  
16  
17  
18  
19  
20  
21  
22  
23  
24  
25  
26  
27  
28  
29  
30  
31  
32  
33  
34  
35  
36  
37  
38  
39  
40  
41  
42  
43  
44  
45  
46  
47  
48  
49  
50  
51  
52  
53  
54  
55  
56  
57  
58  
59  
60

- (6) 排尿管理
  - 0. 留置カテーテル
  - 3. 残尿量 > 100cc. 不定期導尿または介助による間欠的導尿.
  - 6. 残尿量 > 100cc または間欠的の自己導尿. 集尿器<sup>1</sup>をあてがう際の介助は必要.
  - 9. 間欠的の自己導尿. 集尿器を使用する. 器具をあてがう際の介助は不要.
  - 11. 間欠的の自己導尿. 導尿と導尿の間には失禁なし. 集尿器は使用しない.
  - 13. 残尿量 < 100cc. 集尿器のみ必要. 集尿器の取扱いには介助不要.
  - 15. 残尿量 < 100cc. 失禁なし. 集尿器を使用しない.
  
- (7) 排便管理
  - 0. 排便が不規則またはごく低頻度 (3 日に 1 回未満).
  - 5. 規則的ながら. ( 座薬を挿入するなど)に介助を要する. 失敗はまれ ( 月 2 回未満).
  - 8. 規則的な排便で. 介助を要しない. 失敗はまれ ( 月 2 回未満).
  - 10. 規則的な排便で. 介助を要しない. 失敗はなし.
  
- (8) トイレの使用 ( 会陰部の清潔. 使用前後での衣服の扱い. ナプキンまたはおむつの使用 )
  - 0. 全介助を要する.
  - 1. 部分介助を要する. 自分でお尻を拭けない.
  - 2. 部分介助を要する. 自立してお尻を拭ける.
  - 4. 自立してトイレを使用するも. 補助器具または特別な環境 ( 例: 手すり ) が整っている必要あり.
  - 5. 自立してトイレを使用. 補助器具も特別な環境が整っている必要もない.
  
- 小計 (0-40)
  
- 移動 ( 室内とトイレ )**
- (9) ベッド上での姿勢変換と褥瘡予防動作
  - 0. ベッド上で上半身の向きを変えること. 下半身の向きを変えること. 起き上がること. および車椅子上で  
のプッシュアップのすべての動作に介助が必要. 補助器具の要否は問わないが. 電動器具は用いない.
  - 2. 介助なくできる動作が 1 つある.
  - 4. 介助なくできる動作が 2 つまたは 3 つある.
  - 6. ベッド上動作と除圧動作はすべて自立しておこなう.
  
- (10) 移乗: ベッド-車椅子 ( 車いすのブレーキ操作. フットレストの跳ね上げ. アームレストの脱着. 乗り移り. 足の持ち上げ )
  - 0. 全介助を要する.
  - 1. 部分介助. 監視. および補助器具 ( 例: スライディングボード ) のすべて. もしくは. そのいずれかが必要.
  - 2. 自立 ( または車椅子を必要としない ).
  
- (11) 移乗: 車椅子-トイレ. 浴槽 ( トイレ用車椅子<sup>1</sup> を使用している場合は. それへのからの乗り移り. 通常の車椅子を使用している場合は. 車椅子のブレーキ操作. フットレストの跳ね上げ. アームレストの脱着. 乗り移り. 足の持ち上げ )
  - 0. 全介助を要する.
  - 1. 部分介助. 監視. および補助器具 ( 例: 手すり ) のすべて. もしくは. そのいずれかが必要.
  - 2. 自立 ( または車椅子を必要としない ).
  
- 移動 ( 屋内と屋外. 平らな所で )**
- (12) 屋内の移動
  - 0. 全介助を要する.
  - 1. 電動車椅子を必要とするか. または手動車椅子を操作するのに部分介助を要する.
  - 2. 手動車椅子で自立して移動する.
  - 3. 歩行時に監視を必要とする ( 器具の要否は問わない ).
  - 4. 歩行器または松葉杖で歩行 ( 大振り・小振り歩行 ).
  - 5. 松葉杖または T 字杖 2 本で歩行 ( 交互歩行 ).
  - 6. T 字杖 1 本で歩行.
  - 7. 下肢装具のみを必要とする.
  - 8. 歩行補助具なしで歩行.

190x254mm (300 x 300 DPI)

- 1  
2  
3  
4  
5  
6  
7  
8  
9  
10  
11  
12  
13  
14  
15  
16  
17  
18  
19  
20  
21  
22  
23  
24  
25  
26  
27  
28  
29  
30  
31  
32
- (13) まとまった距離の移動 (10~100m)
0. 全介助を要する。
  1. 電動車椅子を必要とするか、または手動車椅子を操作するのに部分介助を要する。
  2. 手動車椅子で自立して移動する。
  3. 歩行時に監視を必要とする(器具の要否は問わない)。
  4. 歩行器または松葉杖で歩行(大振り・小振り歩行)。
  5. 松葉杖または T 字杖 2 本で歩行(交互歩行)。
  6. T 字杖 1 本で歩行。
  7. 下肢装具のみを必要とする。
  8. 歩行補助具なしで歩行。
- (14) 屋外の移動 (100m 以上)
0. 全介助を要する。
  1. 電動車椅子を使用するか、または手動車椅子を操作するのに部分介助を要する。
  2. 手動車椅子で自立して移動する。
  3. 歩行時に監視を必要とする(器具の要否は問わない)。
  4. 歩行器または松葉杖で歩行(大振り・小振り歩行)。
  5. 松葉杖または T 字杖 2 本で歩行(交互歩行)。
  6. T 字杖 1 本で歩行。
  7. 下肢装具のみを必要とする。
  8. 歩行補助具なしで歩行。
- (15) 階段昇降
0. 階段の上り下り不能。
  1. 人に支えられるか、またはその監視下で少なくとも 3 段は上り下りできる。
  2. 手すりにつかまったり、松葉杖や T 字杖を用いて少なくとも 3 段は上り下りできる。
  3. 支えも監視もなく少なくとも 3 段は上り下りできる。
- (16) 移乗: 車椅子一車 (車に近づく、車椅子のブレーキ操作、アームレストおよびフットレストの取り外し、車へのからの乗り移り、車椅子の積み降ろし)
0. 全介助を要する。
  1. 部分介助、監視、および補助器具のすべて、もしくはいずれかを必要とする。
  2. 自立して移乗する。補助器具を必要としない(または車椅子を必要としない)。
- (17) 移乗: 床一車椅子
0. 介助を要する。
  1. 補助器具の有無にかかわらず、自立して移乗する(または車椅子を必要としない)。
- 小計 (0-40)

SCIM 合計スコア (0-100)

## 訳者注

1. 夜間のみ BPAP を使用している場合も 0 点とする
  2. 原書では external drainage instrument、体外からあててるみまがまびく尿器集尿器のことを指す。例えば、コンドーム型集尿器、しびんなどが含まれる。尿道や膀胱に挿入するカテーテルは含まれない
  3. ベッド横やひもなどを使ってもよい
  4. 原書では toilet wheelchair、便器や浴槽に移乗することなく、乗車したまま洋式便器が使用でき、シャワー浴にも使える車椅子のこと。介助型と自立型がある。わが国ではトイレ兼用シャワーキヤリー(介助型)が用いられることがある
- SCIM (Version 3.0) 日本語版 朝川伸之・黒川真希子・出田良輔・星宇明光訳  
 [ Translated by permission from Dr. Amiram Catz, Loewenstein Rehabilitation Hospital, Raanana, Israel ]  
 [ Reprinted by permission from Macmillan Publishers Ltd. Spinal cord 40: 396-407, copyright 2002 ]

190x254mm (300 x 300 DPI)

以下のそれぞれの項目の一つの四角に（このように☐）印をつけて、あなた自身の今日の健康状態を最も良く表している記述を示して下さい。

**移動の程度**

歩き回るのに問題はない

歩き回るのにいくらか問題がある

ベッド（床）に寝たきりである

**身の回りの管理**

身の回りの管理に問題はない

洗面や着替えを自分でするのにいくらか問題がある

洗面や着替えを自分でできない

**ふだんの活動（例：仕事、勉強、家事、家族・余暇活動）**

ふだんの活動を行うのに問題はない

ふだんの活動を行うのにいくらか問題がある

ふだんの活動を行うことができない

**痛み／不快感**

痛みや不快感はない

中程度の痛みや不快感がある

ひどい痛みや不快感がある

**不安／ふさぎ込み**

不安でもふさぎ込んでもいない

中程度に不安あるいはふさぎ込んでいる

ひどく不安あるいはふさぎ込んでいる



1  
2  
3  
4  
5  
6  
7  
8  
9  
10  
11  
12  
13  
14  
15  
16  
17  
18  
19  
20  
21  
22  
23  
24  
25  
26  
27  
28  
29  
30  
31  
32  
33  
34  
35  
36  
37  
38  
39  
40  
41  
42  
43  
44  
45  
46  
47  
48  
49  
50  
51  
52  
53  
54  
55  
56  
57  
58  
59  
60

健康状態がどのくらい良いか悪いかを表わしてもらうために、( 温度計に似たような ) 目盛を描きました。目盛には、あなたの想像できる最も良い状態として 100、あなたの想像できる最も悪い状態として 0 が付けられています。

あなたの今日の健康状態がどのくらい良いか悪いかを、あなたの考えでこの目盛上に示して下さい。下の「あなたの今日の健康状態」と書かれた四角から、あなたの現在の健康状態のよし悪しを示す目盛上の点まで、線を引いて下さい。

**あなたの  
今日の  
健康状態**

想像できる  
最も良い  
健康状態

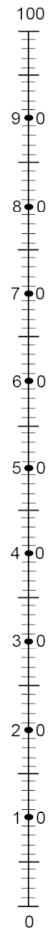

想像できる  
最も悪い  
健康状態

3

Japan (Japanese) © 1997 EuroQol Group EQ-5D™ is a trade mark of the EuroQol Group

190x254mm (300 x 300 DPI)

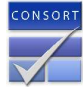

## CONSORT 2010 checklist of information to include when reporting a randomised trial\*

| Section/Topic                    | Item No | Checklist item                                                                                                                                                                              | Reported on page No |
|----------------------------------|---------|---------------------------------------------------------------------------------------------------------------------------------------------------------------------------------------------|---------------------|
| <b>Title and abstract</b>        |         |                                                                                                                                                                                             |                     |
|                                  | 1a      | Identification as a randomised trial in the title                                                                                                                                           | 1                   |
|                                  | 1b      | Structured summary of trial design, methods, results, and conclusions (for specific guidance see CONSORT for abstracts)                                                                     | 3                   |
| <b>Introduction</b>              |         |                                                                                                                                                                                             |                     |
| Background and objectives        | 2a      | Scientific background and explanation of rationale                                                                                                                                          | 4-5                 |
|                                  | 2b      | Specific objectives or hypotheses                                                                                                                                                           | 6                   |
| <b>Methods</b>                   |         |                                                                                                                                                                                             |                     |
| Trial design                     | 3a      | Description of trial design (such as parallel, factorial) including allocation ratio                                                                                                        | 6                   |
|                                  | 3b      | Important changes to methods after trial commencement (such as eligibility criteria), with reasons                                                                                          | N/A                 |
| Participants                     | 4a      | Eligibility criteria for participants                                                                                                                                                       | 7                   |
|                                  | 4b      | Settings and locations where the data were collected                                                                                                                                        | 11                  |
| Interventions                    | 5       | The interventions for each group with sufficient details to allow replication, including how and when they were actually administered                                                       | 6-7                 |
| Outcomes                         | 6a      | Completely defined pre-specified primary and secondary outcome measures, including how and when they were assessed                                                                          | 6-7                 |
|                                  | 6b      | Any changes to trial outcomes after the trial commenced, with reasons                                                                                                                       | N/A                 |
| Sample size                      | 7a      | How sample size was determined                                                                                                                                                              | 8                   |
|                                  | 7b      | When applicable, explanation of any interim analyses and stopping guidelines                                                                                                                | N/A                 |
| <b>Randomisation:</b>            |         |                                                                                                                                                                                             |                     |
| Sequence generation              | 8a      | Method used to generate the random allocation sequence                                                                                                                                      | 6                   |
|                                  | 8b      | Type of randomisation; details of any restriction (such as blocking and block size)                                                                                                         | 6                   |
| Allocation concealment mechanism | 9       | Mechanism used to implement the random allocation sequence (such as sequentially numbered containers), describing any steps taken to conceal the sequence until interventions were assigned | 8                   |
| Implementation                   | 10      | Who generated the random allocation sequence, who enrolled participants, and who assigned participants to interventions                                                                     | 6                   |
| Blinding                         | 11a     | If done, who was blinded after assignment to interventions (for example, participants, care providers, those                                                                                | 8                   |

|    |                          |                                                                                                                     |     |
|----|--------------------------|---------------------------------------------------------------------------------------------------------------------|-----|
| 1  |                          |                                                                                                                     |     |
| 2  |                          | assessing outcomes) and how                                                                                         |     |
| 3  |                          |                                                                                                                     |     |
| 4  |                          | 11b If relevant, description of the similarity of interventions                                                     | N/A |
| 5  | Statistical methods      | 12a Statistical methods used to compare groups for primary and secondary outcomes                                   | 8-9 |
| 6  |                          | 12b Methods for additional analyses, such as subgroup analyses and adjusted analyses                                | N/A |
| 7  |                          |                                                                                                                     |     |
| 8  | <b>Results</b>           |                                                                                                                     |     |
| 9  | Participant flow (a      | 13a For each group, the numbers of participants who were randomly assigned, received intended treatment, and        | N/A |
| 10 | diagram is strongly      | were analysed for the primary outcome                                                                               |     |
| 11 | recommended)             | 13b For each group, losses and exclusions after randomisation, together with reasons                                | N/A |
| 12 | Recruitment              | 14a Dates defining the periods of recruitment and follow-up                                                         | N/A |
| 13 |                          | 14b Why the trial ended or was stopped                                                                              | N/A |
| 14 | Baseline data            | 15 A table showing baseline demographic and clinical characteristics for each group                                 | N/A |
| 15 | Numbers analysed         | 16 For each group, number of participants (denominator) included in each analysis and whether the analysis was      | N/A |
| 16 |                          | by original assigned groups                                                                                         |     |
| 17 |                          |                                                                                                                     |     |
| 18 | Outcomes and             | 17a For each primary and secondary outcome, results for each group, and the estimated effect size and its           | N/A |
| 19 | estimation               | precision (such as 95% confidence interval)                                                                         |     |
| 20 |                          | 17b For binary outcomes, presentation of both absolute and relative effect sizes is recommended                     | N/A |
| 21 | Ancillary analyses       | 18 Results of any other analyses performed, including subgroup analyses and adjusted analyses, distinguishing       | N/A |
| 22 |                          | pre-specified from exploratory                                                                                      |     |
| 23 |                          |                                                                                                                     |     |
| 24 | Harms                    | 19 All important harms or unintended effects in each group (for specific guidance see CONSORT for harms)            | N/A |
| 25 |                          |                                                                                                                     |     |
| 26 | <b>Discussion</b>        |                                                                                                                     |     |
| 27 | Limitations              | 20 Trial limitations, addressing sources of potential bias, imprecision, and, if relevant, multiplicity of analyses | N/A |
| 28 | Generalisability         | 21 Generalisability (external validity, applicability) of the trial findings                                        | N/A |
| 29 | Interpretation           | 22 Interpretation consistent with results, balancing benefits and harms, and considering other relevant evidence    | N/A |
| 30 |                          |                                                                                                                     |     |
| 31 | <b>Other information</b> |                                                                                                                     |     |
| 32 | Registration             | 23 Registration number and name of trial registry                                                                   | 3   |
| 33 | Protocol                 | 24 Where the full trial protocol can be accessed, if available                                                      | 3   |
| 34 | Funding                  | 25 Sources of funding and other support (such as supply of drugs), role of funders                                  | 11  |
| 35 |                          |                                                                                                                     |     |

36

37 \*We strongly recommend reading this statement in conjunction with the CONSORT 2010 Explanation and Elaboration for important clarifications on all the items. If relevant, we also

38 recommend reading CONSORT extensions for cluster randomised trials, non-inferiority and equivalence trials, non-pharmacological treatments, herbal interventions, and pragmatic trials.

39 Additional extensions are forthcoming: for those and for up to date references relevant to this checklist, see [www.consort-statement.org](http://www.consort-statement.org).

40

41

# BMJ Open

## Study Protocol for the G-SPIRIT trial: A Randomized, Placebo-Controlled, Double-blinded Phase 3 Trial of Granulocyte Colony Stimulating Factor-Mediated Neuroprotection for Acute Spinal Cord Injury

|                               |                                                                                                                                                                                                                                                                                                                                                                                                                                                                                                                                                                                                                                                                                                                                                                                                                                                                                                                                                                                                                                                                                                                                                                                                                                                                                                                                                                                                                                                                                                                                                                                                                                                                                                                                                                                                                                                                                                                                                                                                                                                                                                                                                                                                                                                                                                                                                                                                                                   |
|-------------------------------|-----------------------------------------------------------------------------------------------------------------------------------------------------------------------------------------------------------------------------------------------------------------------------------------------------------------------------------------------------------------------------------------------------------------------------------------------------------------------------------------------------------------------------------------------------------------------------------------------------------------------------------------------------------------------------------------------------------------------------------------------------------------------------------------------------------------------------------------------------------------------------------------------------------------------------------------------------------------------------------------------------------------------------------------------------------------------------------------------------------------------------------------------------------------------------------------------------------------------------------------------------------------------------------------------------------------------------------------------------------------------------------------------------------------------------------------------------------------------------------------------------------------------------------------------------------------------------------------------------------------------------------------------------------------------------------------------------------------------------------------------------------------------------------------------------------------------------------------------------------------------------------------------------------------------------------------------------------------------------------------------------------------------------------------------------------------------------------------------------------------------------------------------------------------------------------------------------------------------------------------------------------------------------------------------------------------------------------------------------------------------------------------------------------------------------------|
| Journal:                      | <i>BMJ Open</i>                                                                                                                                                                                                                                                                                                                                                                                                                                                                                                                                                                                                                                                                                                                                                                                                                                                                                                                                                                                                                                                                                                                                                                                                                                                                                                                                                                                                                                                                                                                                                                                                                                                                                                                                                                                                                                                                                                                                                                                                                                                                                                                                                                                                                                                                                                                                                                                                                   |
| Manuscript ID                 | bmjopen-2017-019083.R2                                                                                                                                                                                                                                                                                                                                                                                                                                                                                                                                                                                                                                                                                                                                                                                                                                                                                                                                                                                                                                                                                                                                                                                                                                                                                                                                                                                                                                                                                                                                                                                                                                                                                                                                                                                                                                                                                                                                                                                                                                                                                                                                                                                                                                                                                                                                                                                                            |
| Article Type:                 | Protocol                                                                                                                                                                                                                                                                                                                                                                                                                                                                                                                                                                                                                                                                                                                                                                                                                                                                                                                                                                                                                                                                                                                                                                                                                                                                                                                                                                                                                                                                                                                                                                                                                                                                                                                                                                                                                                                                                                                                                                                                                                                                                                                                                                                                                                                                                                                                                                                                                          |
| Date Submitted by the Author: | 20-Nov-2017                                                                                                                                                                                                                                                                                                                                                                                                                                                                                                                                                                                                                                                                                                                                                                                                                                                                                                                                                                                                                                                                                                                                                                                                                                                                                                                                                                                                                                                                                                                                                                                                                                                                                                                                                                                                                                                                                                                                                                                                                                                                                                                                                                                                                                                                                                                                                                                                                       |
| Complete List of Authors:     | <p>Koda, Masao; G-SPIRIT Study Group; University of Tsukuba, Department of Orthopedic Surgery<br/> Hanaoka, Hideki; G-SPIRIT Study Group; Chiba University Hospital, Clinical Research Center<br/> Sato, Takatoshi; G-SPIRIT Study Group; Chiba University Hospital, Clinical Research Center<br/> Fujii, Yasuhisa; G-SPIRIT Study Group; Chiba University Hospital, Clinical Research Center<br/> Hanawa, Michiko; G-SPIRIT Study Group; Chiba University Hospital, Clinical Research Center<br/> Takahashi, Sho; G-SPIRIT Study Group; Chiba University Hospital, Clinical Research Center<br/> Furuya, Takeo; G-SPIRIT Study Group; Graduate School of Medicine, Chiba University, Department of Orthopaedic Surgery<br/> Ijima, Yasushi; G-SPIRIT Study Group; Graduate School of Medicine, Chiba University, Department of Orthopaedic Surgery<br/> Saito, Junya; G-SPIRIT Study Group; Graduate School of Medicine, Chiba University, Department of Orthopaedic Surgery<br/> Kitamura, Mitsuhiro; G-SPIRIT Study Group; Graduate School of Medicine, Chiba University, Department of Orthopaedic Surgery<br/> Ohtori, Seiji; G-SPIRIT Study Group; Graduate School of Medicine, Chiba University, Department of Orthopaedic Surgery<br/> Matsumoto, Yukei; G-SPIRIT Study Group; University of Tsukuba, Department of Orthopedic Surgery<br/> Abe, Tetsuya; G-SPIRIT Study Group; University of Tsukuba, Department of Orthopedic Surgery<br/> Watanabe, Kei; G-SPIRIT Study Group; Niigata University Graduate School of Medicine and Dental Sciences, Department of Orthopedic Surgery<br/> Hirano, Toru; G-SPIRIT Study Group; Niigata University Graduate School of Medicine and Dental Sciences, Department of Orthopedic Surgery<br/> Ohashi, Masayuki; G-SPIRIT Study Group; Niigata University Graduate School of Medicine and Dental Sciences, Department of Orthopedic Surgery<br/> Shoji, Hirokazu; G-SPIRIT Study Group; Niigata University Graduate School of Medicine and Dental Sciences, Department of Orthopedic Surgery<br/> Mizouchi, Tatsuki; G-SPIRIT Study Group; Niigata University Graduate School of Medicine and Dental Sciences, Department of Orthopedic Surgery<br/> Takahashi, Ikuko; G-SPIRIT Study Group; Niigata University Graduate School of Medicine and Dental Sciences, Department of Orthopedic Surgery<br/> Kawahara, Norio; G-SPIRIT Study Group; Kanazawa Medical University,</p> |

|    |                                                                         |
|----|-------------------------------------------------------------------------|
| 1  |                                                                         |
| 2  |                                                                         |
| 3  |                                                                         |
| 4  | Orthopaedic Surgery                                                     |
| 5  | Kawaguchi, Masahito; G-SPIRIT Study Group; Kanazawa Medical             |
| 6  | University, Orthopaedic Surgery                                         |
| 7  | Orita, Yugo; G-SPIRIT Study Group; Kanazawa Medical University,         |
| 8  | Orthopaedic Surgery                                                     |
| 9  | Sasamoto, Takeshi; G-SPIRIT Study Group; Kanazawa Medical University,   |
| 10 | Orthopaedic Surgery                                                     |
| 11 | Yoshioka, Masahito; G-SPIRIT Study Group; Kanazawa Medical University,  |
| 12 | Orthopaedic Surgery                                                     |
| 13 | Fujii, Masafumi; G-SPIRIT Study Group; Kanazawa Medical University,     |
| 14 | Orthopaedic Surgery                                                     |
| 15 | Yonezawa, Katsutaka; G-SPIRIT Study Group; Kanazawa Medical             |
| 16 | University, Orthopaedic Surgery                                         |
| 17 | Soma, Daisuke; G-SPIRIT Study Group; Kanazawa Medical University,       |
| 18 | Orthopaedic Surgery                                                     |
| 19 | Taneichi, Hiroshi; G-SPIRIT Study Group; Dokkyo Ika Daigaku, Department |
| 20 | of Orthopedic Surgery                                                   |
| 21 | Takeuchi, Daisaku; G-SPIRIT Study Group; Dokkyo Ika Daigaku,            |
| 22 | Department of Orthopedic Surgery                                        |
| 23 | Inami, Satoshi; G-SPIRIT Study Group; Dokkyo Ika Daigaku, Department    |
| 24 | of Orthopedic Surgery                                                   |
| 25 | Moridaira, Hiroshi; G-SPIRIT Study Group; Dokkyo Ika Daigaku,           |
| 26 | Department of Orthopedic Surgery                                        |
| 27 | Ueda, Haruki; G-SPIRIT Study Group; Dokkyo Ika Daigaku, Department of   |
| 28 | Orthopedic Surgery                                                      |
| 29 | Asano, Futoshi; G-SPIRIT Study Group; Dokkyo Ika Daigaku, Department    |
| 30 | of Orthopedic Surgery                                                   |
| 31 | Shibao, Yosuke; G-SPIRIT Study Group; Dokkyo Ika Daigaku, Department    |
| 32 | of Orthopedic Surgery                                                   |
| 33 | Aita, Ikuo; G-SPIRIT Study Group; Tsukuba Medical Center Byoin,         |
| 34 | Department of Orthopedic Surgery                                        |
| 35 | Takeuchi, Yosuke; G-SPIRIT Study Group; Tsukuba Medical Center Byoin,   |
| 36 | Department of Orthopedic Surgery                                        |
| 37 | Mimura, Masaya; G-SPIRIT Study Group; Funabashi Shiritsu Iryo Center,   |
| 38 | Department of Orthopedic Surgery                                        |
| 39 | Shimbo, Jun; G-SPIRIT Study Group; Funabashi Shiritsu Iryo Center,      |
| 40 | Department of Orthopedic Surgery                                        |
| 41 | Someya, Yukio; G-SPIRIT Study Group; Funabashi Shiritsu Iryo Center,    |
| 42 | Department of Orthopedic Surgery                                        |
| 43 | Ikenoue, Sumio; G-SPIRIT Study Group; Funabashi Shiritsu Iryo Center,   |
| 44 | Department of Orthopedic Surgery                                        |
| 45 | Sameda, Hiroaki; G-SPIRIT Study Group; Funabashi Shiritsu Iryo Center,  |
| 46 | Department of Orthopedic Surgery                                        |
| 47 | Takase, Kan; G-SPIRIT Study Group; Funabashi Shiritsu Iryo Center,      |
| 48 | Department of Orthopedic Surgery                                        |
| 49 | Ikeda, Yoshikazu; G-SPIRIT Study Group; Chiba Rosai Byoin, Department   |
| 50 | of Orthopedic Surgery                                                   |
| 51 | Nakajima, Fumitake; G-SPIRIT Study Group; Chiba Rosai Byoin,            |
| 52 | Department of Orthopedic Surgery                                        |
| 53 | Hashimoto, Mitsuhiro; G-SPIRIT Study Group; Chiba Rosai Byoin,          |
| 54 | Department of Orthopedic Surgery                                        |
| 55 | Ozawa, Tomoyuki; G-SPIRIT Study Group; Chiba Rosai Byoin, Department    |
| 56 | of Orthopedic Surgery                                                   |
| 57 | Hasue, Fumio; G-SPIRIT Study Group; Kimitsu Chuo Byoin, Department of   |
| 58 | Orthopedic Surgery                                                      |
| 59 | Fujiyoshi, Takayuki; G-SPIRIT Study Group; Kimitsu Chuo Byoin,          |
| 60 | Department of Orthopedic Surgery                                        |
|    | Kamiya, Koshiro; G-SPIRIT Study Group; Kimitsu Chuo Byoin, Department   |
|    | of Orthopedic Surgery                                                   |
|    | Watanabe, Masahiko; G-SPIRIT Study Group; Tokai Daigaku Igakubu         |
|    | Seikei Gekagaku, Department of Orthopedic Surgery                       |

|    |                                                                          |
|----|--------------------------------------------------------------------------|
| 1  |                                                                          |
| 2  |                                                                          |
| 3  |                                                                          |
| 4  | Katoh, Hiroyuki; G-SPIRIT Study Group; Tokai Daigaku - Isehara Campus,   |
| 5  | Department of Orthopedic Surgery                                         |
| 6  | Matsuyama, Yukihiro; G-SPIRIT Study Group; Hamamatsu Ika Daigaku,        |
| 7  | Department of Orthopedic Surgery                                         |
| 8  | Yamato, Yu; G-SPIRIT Study Group; Hamamatsu Ika Daigaku, Department      |
| 9  | of Orthopedic Surgery                                                    |
| 10 | Togawa, Daisuke; G-SPIRIT Study Group; Hamamatsu Ika Daigaku,            |
| 11 | Department of Orthopedic Surgery                                         |
| 12 | Hasegawa, Tomohiko; G-SPIRIT Study Group; Hamamatsu Ika Daigaku,         |
| 13 | Department of Orthopedic Surgery                                         |
| 14 | Kobayashi, Sho; G-SPIRIT Study Group; Hamamatsu Ika Daigaku,             |
| 15 | Department of Orthopedic Surgery                                         |
| 16 | Yoshida, Go; G-SPIRIT Study Group; Hamamatsu Ika Daigaku, Department     |
| 17 | of Orthopedic Surgery                                                    |
| 18 | Oe, Shin; G-SPIRIT Study Group; Hamamatsu Ika Daigaku, Department of     |
| 19 | Orthopedic Surgery                                                       |
| 20 | Banno, Tomohiro; G-SPIRIT Study Group; Hamamatsu Ika Daigaku,            |
| 21 | Department of Orthopedic Surgery                                         |
| 22 | Arima, Hideyuki; G-SPIRIT Study Group; Hamamatsu Ika Daigaku,            |
| 23 | Department of Orthopedic Surgery                                         |
| 24 | Akeda, Koji; G-SPIRIT Study Group; Mie Daigaku Daigakuin Igakukei        |
| 25 | Kenkyuka Igakubu, Department of Orthopedic Surgery                       |
| 26 | Kawamoto, Eiji; G-SPIRIT Study Group; Mie Daigaku Daigakuin Igakukei     |
| 27 | Kenkyuka Igakubu, Department of Orthopedic Surgery                       |
| 28 | Imai, Hiroshi; G-SPIRIT Study Group; Mie Daigaku Daigakuin Igakukei      |
| 29 | Kenkyuka Igakubu, Department of Orthopedic Surgery                       |
| 30 | Sakakibara, Toshihiko; G-SPIRIT Study Group; Mie Daigaku Daigakuin       |
| 31 | Igakukei Kenkyuka Igakubu, Department of Orthopedic Surgery              |
| 32 | Sudo, Akihiro ; G-SPIRIT Study Group; Mie Daigaku Daigakuin Igakukei     |
| 33 | Kenkyuka Igakubu, Department of Orthopedic Surgery                       |
| 34 | Ito, Yasuo; G-SPIRIT Study Group; Kobe Sekijuji Byoin, Department of     |
| 35 | Orthopedic Surgery                                                       |
| 36 | Kikuchi, Tsuyoshi; G-SPIRIT Study Group; Kobe Sekijuji Byoin, Department |
| 37 | of Orthopedic Surgery                                                    |
| 38 | Osaki, Shuhei; G-SPIRIT Study Group; Kobe Sekijuji Byoin, Department of  |
| 39 | Orthopedic Surgery                                                       |
| 40 | Tanaka, Nobuhiro; G-SPIRIT Study Group; Hiroshima Daigaku Igakubu        |
| 41 | Daigakuin Ishiyaku Hokengaku Kenkyuka, Department of Orthopedic          |
| 42 | Surgery                                                                  |
| 43 | Nakanishi, Kazuyoshi; G-SPIRIT Study Group; Hiroshima Daigaku Igakubu    |
| 44 | Daigakuin Ishiyaku Hokengaku Kenkyuka, Department of Orthopedic          |
| 45 | Surgery                                                                  |
| 46 | Kamei, Naosuke; G-SPIRIT Study Group; Hiroshima Daigaku Igakubu          |
| 47 | Daigakuin Ishiyaku Hokengaku Kenkyuka, Department of Orthopedic          |
| 48 | Surgery                                                                  |
| 49 | Kotaka, Shinji; G-SPIRIT Study Group; Hiroshima Daigaku Igakubu          |
| 50 | Daigakuin Ishiyaku Hokengaku Kenkyuka, Department of Orthopedic          |
| 51 | Surgery                                                                  |
| 52 | Baba, Hideo; G-SPIRIT Study Group; Nagasaki Rosai Byoin, Department of   |
| 53 | Orthopedic Surgery                                                       |
| 54 | Okudaira, Tsuyoshi; G-SPIRIT Study Group; Nagasaki Rosai Byoin,          |
| 55 | Department of Orthopedic Surgery                                         |
| 56 | Hiroaki, Konishi; G-SPIRIT Study Group; Nagasaki Rosai Byoin,            |
| 57 | Department of Orthopedic Surgery                                         |
| 58 | Yamaguchi, Takayuki; G-SPIRIT Study Group; Nagasaki Rosai Byoin,         |
| 59 | Department of Orthopedic Surgery                                         |
| 60 | Ito, Keigo; G-SPIRIT Study Group; Chubu Rosai Byoin, Department of       |
|    | Orthopedic Surgery                                                       |
|    | Katayama, Yoshito; G-SPIRIT Study Group; Chubu Rosai Byoin,              |
|    | Department of Orthopedic Surgery                                         |
|    | Matsumoto, Taro; G-SPIRIT Study Group; Chubu Rosai Byoin, Department     |

|                                 |                                                                                                                                                                                                                                                                                                                                                                                                                                                                                                                                                                                                                                                                                                                                                                                                                                                                                                                                                                                                                                                                                                                                                                                                                                                                                                                                                                                                                                                                                                                                                                                                                                                                                                                                                                                                                                                                                                                                                                                                                                                                                                                                                                                                                                                                                                                                                                                                               |
|---------------------------------|---------------------------------------------------------------------------------------------------------------------------------------------------------------------------------------------------------------------------------------------------------------------------------------------------------------------------------------------------------------------------------------------------------------------------------------------------------------------------------------------------------------------------------------------------------------------------------------------------------------------------------------------------------------------------------------------------------------------------------------------------------------------------------------------------------------------------------------------------------------------------------------------------------------------------------------------------------------------------------------------------------------------------------------------------------------------------------------------------------------------------------------------------------------------------------------------------------------------------------------------------------------------------------------------------------------------------------------------------------------------------------------------------------------------------------------------------------------------------------------------------------------------------------------------------------------------------------------------------------------------------------------------------------------------------------------------------------------------------------------------------------------------------------------------------------------------------------------------------------------------------------------------------------------------------------------------------------------------------------------------------------------------------------------------------------------------------------------------------------------------------------------------------------------------------------------------------------------------------------------------------------------------------------------------------------------------------------------------------------------------------------------------------------------|
|                                 | <p>of Orthopedic Surgery<br/>         Matsumoto, Tomohiro; G-SPIRIT Study Group; Chubu Rosai Byoin, Department of Orthopedic Surgery<br/>         Idota, Masaru; G-SPIRIT Study Group; Chubu Rosai Byoin, Department of Orthopedic Surgery<br/>         Kanno, Haruo; G-SPIRIT Study Group; Tohoku University School of Medicine, Department of Orthopedic Surgery<br/>         Aizawa, Toshimi; G-SPIRIT Study Group; Tohoku University School of Medicine, Department of Orthopedic Surgery<br/>         Hashimoto, Ko; G-SPIRIT Study Group; Tohoku University School of Medicine, Department of Orthopedic Surgery<br/>         Eto, Toshimitsu; G-SPIRIT Study Group; Tohoku University School of Medicine, Department of Orthopedic Surgery<br/>         Sugaya, Takehiro; G-SPIRIT Study Group; Tohoku University School of Medicine, Department of Orthopedic Surgery<br/>         Matsuda, Michiharu; G-SPIRIT Study Group; Tohoku University School of Medicine, Department of Orthopedic Surgery<br/>         Fushimi, Kazunari; G-SPIRIT Study Group; Gifu Daigaku Igakubu Daigakuin Igaku Kenkyuka Seikei Gekagaku, Department of Orthopedic Surgery<br/>         Nozawa, Satoshi; G-SPIRIT Study Group; Gifu Daigaku Igakubu Daigakuin Igaku Kenkyuka Seikei Gekagaku, Department of Orthopedic Surgery<br/>         Iwai, Chizuo; G-SPIRIT Study Group; Gifu Daigaku Igakubu Daigakuin Igaku Kenkyuka Seikei Gekagaku, Department of Orthopedic Surgery<br/>         Taguchi, Toshihiko; G-SPIRIT Study Group; Yamaguchi Daigaku Igakubu Daigakuin Igakukei Kenkyuka Seikei Gekagaku, Department of Orthopedic Surgery<br/>         Kanchiku, Tsukasa; G-SPIRIT Study Group; Yamaguchi Daigaku Igakubu Daigakuin Igakukei Kenkyuka Seikei Gekagaku, Department of Orthopedic Surgery<br/>         Suzuki, Hidenori; G-SPIRIT Study Group; Yamaguchi Daigaku Igakubu Daigakuin Igakukei Kenkyuka Seikei Gekagaku, Department of Orthopedic Surgery<br/>         Nishida, Norihiro; G-SPIRIT Study Group; Yamaguchi Daigaku Igakubu Daigakuin Igakukei Kenkyuka Seikei Gekagaku, Department of Orthopedic Surgery<br/>         Funaba, Masahiro; G-SPIRIT Study Group; Yamaguchi Daigaku Igakubu Daigakuin Igakukei Kenkyuka Seikei Gekagaku, Department of Orthopedic Surgery<br/>         Yamazaki, Masashi; G-SPIRIT Study Group; University of Tsukuba, Department of Orthopedic Surgery</p> |
| <b>Primary Subject Heading</b>: | Neurology                                                                                                                                                                                                                                                                                                                                                                                                                                                                                                                                                                                                                                                                                                                                                                                                                                                                                                                                                                                                                                                                                                                                                                                                                                                                                                                                                                                                                                                                                                                                                                                                                                                                                                                                                                                                                                                                                                                                                                                                                                                                                                                                                                                                                                                                                                                                                                                                     |
| Secondary Subject Heading:      | Medical management                                                                                                                                                                                                                                                                                                                                                                                                                                                                                                                                                                                                                                                                                                                                                                                                                                                                                                                                                                                                                                                                                                                                                                                                                                                                                                                                                                                                                                                                                                                                                                                                                                                                                                                                                                                                                                                                                                                                                                                                                                                                                                                                                                                                                                                                                                                                                                                            |
| Keywords:                       | Neurological injury < NEUROLOGY, Spine < ORTHOPAEDIC & TRAUMA SURGERY, Clinical trials < THERAPEUTICS                                                                                                                                                                                                                                                                                                                                                                                                                                                                                                                                                                                                                                                                                                                                                                                                                                                                                                                                                                                                                                                                                                                                                                                                                                                                                                                                                                                                                                                                                                                                                                                                                                                                                                                                                                                                                                                                                                                                                                                                                                                                                                                                                                                                                                                                                                         |
|                                 |                                                                                                                                                                                                                                                                                                                                                                                                                                                                                                                                                                                                                                                                                                                                                                                                                                                                                                                                                                                                                                                                                                                                                                                                                                                                                                                                                                                                                                                                                                                                                                                                                                                                                                                                                                                                                                                                                                                                                                                                                                                                                                                                                                                                                                                                                                                                                                                                               |

SCHOLARONE™  
 Manuscripts

1  
2  
3  
4  
5  
6  
7  
8  
9  
10  
11  
12  
13  
14  
15  
16  
17  
18  
19  
20  
21  
22  
23  
24  
25  
26  
27  
28  
29  
30  
31  
32  
33  
34  
35  
36  
37  
38  
39  
40  
41  
42  
43  
44  
45  
46  
47  
48  
49  
50  
51  
52  
53  
54  
55  
56  
57  
58  
59  
60

## Study Protocol for the G-SPIRIT trial: A Randomized, Placebo-Controlled, Double-blinded Phase 3 Trial of Granulocyte Colony Stimulating Factor-Mediated Neuroprotection for Acute Spinal Cord Injury

Corresponding Author: Masao Koda

1-1-1 Tennodai, Tsukuba City, Ibaraki 3058575, Japan

e-mail: [masaokod@gmail.com](mailto:masaokod@gmail.com), tel: 81-29-853-3219

Authors: Masao Koda<sup>1,2</sup>, Hideki Hanaoka<sup>1,3</sup>, Takatoshi Sato<sup>1,3</sup>, Yasuhisa Fujii<sup>1,3</sup>, Michiko Hanawa<sup>1,3</sup>, Sho Takahashi<sup>1,3</sup>, Takeo Furuya<sup>1,4</sup>, Yasushi Ijima<sup>1,4</sup>, Junya Saito<sup>1,4</sup>, Mitsuhiro Kitamura<sup>1,4</sup>, Seiji Ohtori<sup>1,4</sup>, Yukei Matsumoto<sup>1,2</sup>, Tetsuya Abe<sup>1,2</sup>, Kei Watanabe<sup>1,5</sup>, Toru Hirano<sup>1,5</sup>, Masayuki Ohashi<sup>1,5</sup>, Hirokazu Shoji<sup>1,5</sup>, Tatsuki Mizouchi<sup>1,5</sup>, Ikuko Takahashi<sup>1,5</sup>, Norio Kawahara<sup>1,6</sup>, Masahito Kawaguchi<sup>1,6</sup>, Yugo Orita<sup>1,6</sup>, Takeshi Sasamoto<sup>1,6</sup>, Masahito Yoshioka<sup>1,6</sup>, Masafumi Fujii<sup>1,6</sup>, Katsutaka Yonezawa<sup>1,6</sup>, Daisuke Soma<sup>1,6</sup>, Hiroshi Taneichi<sup>1,7</sup>, Daisaku Takeuchi<sup>1,7</sup>, Satoshi Inami<sup>1,7</sup>, Hiroshi Moridaira<sup>1,7</sup>, Haruki Ueda<sup>1,7</sup>, Futoshi Asano<sup>1,7</sup>, Yosuke Shibao<sup>1,7</sup>, Ikuo Aita<sup>1,8</sup>, Yosuke Takeuchi<sup>1,8</sup>, Masaya Mimura<sup>1,9</sup>, Jun Shimbo<sup>1,9</sup>, Yukio Someya<sup>1,9</sup>, Sumio Ikenoue<sup>1,9</sup>, Hiroaki Sameda<sup>1,9</sup>, Kan Takase<sup>1,9</sup>, Yoshikazu Ikeda<sup>1,10</sup>, Fumitake Nakajima<sup>1,10</sup>, Mitsuhiro Hashimoto<sup>1,10</sup>, Tomoyuki Ozawa<sup>1,10</sup>, Fumio Hasue<sup>1,11</sup>, Takayuki Fujiyoshi<sup>1,11</sup>, Koshiro Kamiya<sup>1,11</sup>, Masahiko Watanabe<sup>1,12</sup>, Hiroyuki Katoh<sup>1,12</sup>, Yukihiro Matsuyama<sup>1,13</sup>, Yu Yamamoto<sup>1,13</sup>, Daisuke Togawa<sup>1,13</sup>, Tomohiko Hasegawa<sup>1,13</sup>, Sho Kobayashi<sup>1,13</sup>, Go Yoshida<sup>1,13</sup>, Shin Oe<sup>1,13</sup>, Tomohiro Banno<sup>1,13</sup>, Hideyuki Arima<sup>1,13</sup>, Koji Akeda<sup>1,14</sup>, Eiji Kawamoto<sup>1,14</sup>, Hiroshi Imai<sup>1,14</sup>, Toshihiko Sakakibara<sup>1,14</sup>, Akihiro Sudo<sup>1,14</sup>, Yasuo Ito<sup>1,15</sup>, Tsuyoshi Kikuchi<sup>1,15</sup>, Shuhei Osaki<sup>1,15</sup>, Nobuhiro Tanaka<sup>1,16</sup>, Kazuyoshi Nakanishi<sup>1,16</sup>, Naosuke Kamei<sup>1,16</sup>, Shinji Kotaka<sup>1,16</sup>, Hideo Baba<sup>1,17</sup>, Tsuyoshi Okudaira<sup>1,17</sup>, Hiroaki Konishi<sup>1,17</sup>, Takayuki Yamaguchi<sup>1,17</sup>, Keigo Ito<sup>1,18</sup>, Yoshito Katayama<sup>1,18</sup>, Taro Matsumoto<sup>1,18</sup>, Tomohiro Matsumoto<sup>1,18</sup>, Masaru Idota<sup>1,18</sup>, Haruo Kanno<sup>1,19</sup>, Toshimi Aizawa<sup>1,19</sup>, Ko Hashimoto<sup>1,19</sup>, Toshimitsu Eto<sup>1,19</sup>, Takehiro Sugaya<sup>1,19</sup>, Michiharu Matsuda<sup>1,19</sup>, Kazunari Fushimi<sup>1,20</sup>, Satoshi Nozawa<sup>1,20</sup>, Chizuo Iwai<sup>1,20</sup>, Toshihiko Taguchi<sup>1,21</sup>, Tsukasa Kanchiku<sup>1,21</sup>, Hidenori Suzuki<sup>1,21</sup>, Norihiro Nishida<sup>1,21</sup>, Masahiro Funaba<sup>1,21</sup>, Masashi Yamazaki<sup>1,2</sup>



1  
2  
3  
4  
5 Affiliations  
6

7 <sup>1</sup>G-SPIRIT Study Group is consisted by Nineteen major hospitals in Japan constituting the  
8 G-SPIRIT study group  
9

10 <sup>2</sup>Department of Orthopedic Surgery, University of Tsukuba, Ibaraki

11 <sup>3</sup>Clinical Research Center, Chiba University Hospital, Chiba

12 <sup>4</sup>Department of Orthopedic Surgery, Chiba University Graduate School of Medicine, Chiba

13 <sup>5</sup>Department of Orthopedic Surgery, Niigata University Graduate School of Medicine and  
14 Dental Sciences, Niigata  
15

16 <sup>6</sup>Department of Orthopedic Surgery, Kanazawa Medical University, Ishikawa

17 <sup>7</sup>Department of Orthopedic Surgery, Dokkyo Medical University, Tochigi

18 <sup>8</sup>Department of Orthopedic Surgery, Tsukuba Medical Center, Ibaraki

19 <sup>9</sup>Department of Orthopedic Surgery, Funabashi Municipal Medical Center, Chiba

20 <sup>10</sup>Department of Orthopedic Surgery, Chiba Rosai Hospital, Chiba

21 <sup>11</sup>Department of Orthopedic Surgery, Kimitsu Chuo Hospital, Chiba

22 <sup>12</sup>Department of Orthopedic Surgery, Tokai University School of Medicine, Kanagawa

23 <sup>13</sup>Department of Orthopedic Surgery, Hamamatsu University School of Medicine, Shizuoka

24 <sup>14</sup>Department of Orthopedic Surgery, Graduate School of Medicine, Mie University, Mie

25 <sup>15</sup>Department of Orthopedic Surgery, Kobe Red Cross Hospital, Hyogo

26 <sup>16</sup>Department of Orthopedic Surgery, Graduate School of Biomedical Sciences, Hiroshima  
27 University, Hiroshima  
28

29 <sup>17</sup>Department of Orthopedic Surgery, Nagasaki Rosai Hospital, Nagasaki

30 <sup>18</sup>Department of Orthopedic Surgery, Chubu Rosai Hospital, Aichi

31 <sup>19</sup>Department of Orthopedic Surgery, Tohoku University School of Medicine, Miyagi

32 <sup>20</sup>Department of Orthopedic Surgery, Gifu University School of Medicine, Gifu

33 <sup>21</sup>Department of Orthopedic Surgery, Yamaguchi University Graduate School of Medicine,  
34 Yamaguchi  
35

36  
37  
38  
39  
40  
41  
42  
43  
44  
45  
46  
47  
48  
49  
50  
51  
52 Word Count: 2516  
53  
54  
55  
56  
57

## Abstract

**Introduction:** Granulocyte Colony Stimulating Factor (G-CSF) is generally used for neutropenia. Previous experimental studies revealed that G-CSF promoted neurological recovery after spinal cord injury (SCI). Next we moved to early phase of clinical trials. In a phase 1/2a trial, no adverse events were observed. Next, we conducted a non-randomized, non-blinded, comparative trial, which suggested the efficacy of G-CSF for promoting neurological recovery. Based on those results, we are now performing a phase 3 trial.

**Methods and Analysis:** The objective of this study is to evaluate the efficacy of G-CSF for acute SCI. The study design is a prospective, multicenter, randomized, double-blinded, placebo-controlled comparative study. The current trial includes cervical SCI (severity of American Spinal Injury Association (ASIA) Impairment Scale B/C) within 48 hours after injury. Patients are randomly assigned to G-CSF and placebo groups. The G-CSF group is administered 400  $\mu\text{g}/\text{m}^2/\text{d}\times 5\text{d}$  of G-CSF in normal saline via intravenous infusion for 5 consecutive days. The placebo group is similarly administered a placebo. Our primary endpoint is changes in ASIA motor scores from baseline to 3 months. Each group includes 44 patients (88 total patients). This trial is funded by the Center for Clinical Trials, Japan Medical Association.

**Ethics and Dissemination:** The study was approved by the Institutional Review Board of each institution and will be conducted according to the principles of the World Medical Association Declaration of Helsinki and in accordance with the Japanese Medical Research Involving Human Subjects Act and other guidelines, regulations and Acts. Results of the clinical study will be submitted to the head of the respective clinical study site as a report after conclusion of the clinical study by the sponsor-investigator. Even if the results are not favorable despite conducting the clinical study properly, the data will be published as a paper.

**Registration:** UMIN000018752

<https://upload.umin.ac.jp/cgi-open-bin/ctr/ctr.cgi?function=brows&action=brows&type=summary&recptno=R000021694&language=J>

## Strengths and Limitations of This Study

### *Strengths*

- ✓ Novel drug therapy for acute spinal cord injury is much-needed.
- ✓ Randomized, placebo-controlled, double-blinded design can eliminate bias.

### *Limitations*

- ✓ Acute spinal cord injury patients are difficult to recruit to the trial.
- ✓ Patient's neurological status in acute phase is unstable, possibly resulting in dispersion of the patient's background.
- ✓ Concealment must be performed very strictly because G-CSF apparently increases

white blood cell count.

## Introduction

Spinal cord injury (SCI) is a devastating injury by which the patient can suffer from long-lasting severe sequelae including palsy of extremities, sensory disturbance, bowel/bladder/sexual dysfunction, and neuropathic pain. Conceptually, SCI is divided into two chronological phases: a primary and a secondary phase. Primary injury is mechanical damage to spinal cord tissue itself caused by fracture and/or dislocation or compression. Secondary injury is triggered by the primary injury and is a biological reaction of the spinal cord, which includes ischemia, hemorrhage, excitotoxicity, hyperpermeability, and inflammation<sup>1</sup>. Because secondary injury can be the main target of treatment, extensive laboratory and clinical investigation of neuroprotection is needed to manage secondary injury<sup>2</sup>.

To date, the only approved neuroprotective therapy for SCI is massive methylprednisolone sodium succinate (MPSS) therapy based on the NASCIS 2 study<sup>3</sup>. However, recent reports revealed that MPSS shows only a modest effect for SCI. In addition, several reports have described adverse events induced by MPSS for SCI including infections (pneumonia, urinary tract infection) and gastrointestinal disorders (gastric ulcer, etc.)<sup>4</sup>. Therefore, the use of MPSS for SCI has become controversial<sup>5</sup>. Accordingly, a new therapeutic drug for SCI is desirable.

Granulocyte colony-stimulating factor (G-CSF, generic name: filgrastim) is a growth factor that affects the hematopoietic system, promoting differentiation, proliferation, and survival of granulocytes<sup>6</sup>. Clinically, in Japan, G-CSF is administered to patients with leukopenia, and to peripheral stem cell transplantation donors, G-CSF is administered to mobilize hematopoietic stem cells into the peripheral blood<sup>7</sup>. In the central nervous system, G-CSF has properties to mobilize the movement of bone marrow cells into the brain<sup>8</sup> and spine, and in a stroke model, has shown neuroprotective properties<sup>9</sup>. In other countries, clinical studies of the effects of G-CSF in cerebral infarction have been reported<sup>10</sup>.

To prove the hypothesis that G-CSF has neuroprotective properties against SCI, G-CSF was administered to rat and mouse animal models of spinal cord injury, and hind limb

1  
2  
3  
4  
5  
6 function improved significantly after administration of G-CSF. Further investigations into  
7 the mechanism of action of G-CSF in SCI were conducted. Data obtained to date identify  
8 the following properties of G-CSF: [1] mobilization of bone marrow-derived stem cells  
9 causing their biointegration at the site of SCI<sup>11</sup>, [2] direct inhibition of nerve cell death<sup>12</sup>,  
10 [3] protection of the myelin sheath by inhibiting oligodendrocyte cell death<sup>13</sup>, [4] inhibition  
11 of inflammatory cytokine expression (TNF- $\alpha$ , IL-1 $\beta$ )<sup>13</sup>, and [5] promotion of  
12 neovascularization<sup>14</sup>. These properties suggest that G-CSF has a neuroprotective effect in  
13 acute SCI.  
14  
15

16  
17  
18  
19 Based on these properties, a phase 1/2a clinical study was conducted where the main  
20 objective was to confirm the safety and feasibility of G-CSF for treatment of patients with  
21 acute SCI<sup>15</sup>. This study was an open-label, dose-titrating study with no control group. As  
22 the initial step, 5 patients were given 5  $\mu\text{g}/\text{kg}/\text{day}$  of G-CSF for 5 consecutive days by i.v.  
23 infusion, and as the second step, 11 patients were given 10  $\mu\text{g}/\text{kg}/\text{day}$  of G-CSF for 5  
24 consecutive days by i.v. infusion. No serious adverse events were noted, and the safety of  
25 G-CSF administration in patients with acute SCI was confirmed<sup>15</sup>.  
26  
27  
28  
29  
30

31 As a next step, to validate the efficacy of G-CSF in neuroprotective treatment, a  
32 multicenter, prospective, nonrandomized, nonblinded, comparative control study (phase 2b  
33 clinical trial) was conducted<sup>16</sup>. Based on the results of the previous phase 1/2a clinical trial,  
34 the dosage and duration of treatment with G-CSF in this study was 10  $\mu\text{g}/\text{kg}/\text{day}$  for 5  
35 consecutive days. Patients with acute cervical SCI (within 48 h of injury) were registered in  
36 the clinical trial and allocated to either the G-CSF group (G-CSF 10  $\mu\text{g}/\text{kg}/\text{day} \times 5$  days i.v.  
37 infusion) or control group (no G-CSF administration) at each treatment facility. A total of  
38 19 patients in the G-CSF group and 26 patients in the control group were observed for 3  
39 months or longer. American Spinal Injury Association (ASIA) motor score (motor: 0 to 100  
40 points) was compared between the groups. ASIA motor scores were  $26.1 \pm 18.9$  in the  
41 G-CSF group and  $12.2 \pm 14.7$  in the control group showing a significant improvement of  
42 motor paralysis in the G-CSF group ( $p < 0.01$ ). In addition, in cases that could be followed  
43 for 1 year or longer, a significant improvement of ASIA motor score was observed in the  
44 G-CSF group<sup>16</sup>.  
45  
46  
47  
48  
49  
50  
51  
52  
53  
54  
55  
56  
57  
58  
59  
60

1  
2  
3  
4  
5 Based on results of these preclinical and early phase clinical trials, we are now  
6 conducting a phase 3 trial.  
7  
8  
9

### 10 *Specific Objective*

11 The objective of this study is to evaluate the efficacy of G-CSF for improving motor  
12 paralysis in acute SCI.  
13  
14  
15

## 16 **Methods and Analysis**

### 17 *Design of the study*

18 The study design of the current trial is a prospective, multicenter, randomized,  
19 double-blinded, placebo-controlled comparative study.  
20  
21  
22  
23  
24  
25

### 26 *Study Procedures*

27 The study outline is shown in Figure. Patients will be randomly assigned to G-CSF and  
28 placebo groups. A central registration system will be used for dynamic randomization into  
29 the investigational treatment group (G-CSF) and control group (placebo) based on age at  
30 registration (16–64 years of age, or 65–84 years of age) and severity of paralysis (AIS B or  
31 C) at 48 h after injury. With or without the surgical stabilization and/or decompression was  
32 not included in stratification. Initially, screened patients with severity AIS B/C will be  
33 tentatively enrolled. Initial screening of the patients include clinical laboratory test, imaging  
34 studies including X-ray, magnetic resonance imaging and computed tomography, and  
35 neurological/functional evaluations.  
36  
37  
38  
39  
40  
41  
42

43 Neurological re-assessment will be performed 48±4 hours after SCI and the patients  
44 who will recover to severity AIS D will be excluded. The patients with severity AIS B/C at  
45 neurological re-assessment 48±4 hours after SCI will be enrolled and randomly allocated to  
46 either the investigational treatment group (G-CSF) or control group (placebo) in a 1 to 1  
47 ratio. The subject registration center uses a program based on an appropriate computer  
48 algorithm to allocate patients into groups. The first dose of investigative drugs will be  
49 administered to the patients after re-assessment of neurological status and enrollment 48±4  
50  
51  
52  
53  
54  
55  
56  
57  
58  
59  
60

1  
2  
3  
4  
5 hours after SCI.  
6

7 The G-CSF group will be administered  $400 \mu\text{g}/\text{m}^2/\text{d} \times 5\text{d}$  of G-CSF in normal saline via  
8 intravenous infusion for 5 consecutive days. The placebo group will be similarly  
9 administered a placebo. The first dose of investigative drugs will be administered to the  
10 patients  $48 \pm 4$  hours after SCI. The dosing schedule will be once a day in every morning  
11 (9-10 AM) for consecutive 5 days even in case that the first dosing was performed at night  
12 because of restriction on practices. Investigational drugs including both G-CSF and placebo  
13 will be stored in refrigerator which will be kept between  $1-6^\circ\text{C}$  and has temperature-logger  
14 in pharmacies in each participating institutes. The investigational drugs is packaged in  
15 ample with label only printed as serial numbers, ten ample is packed in one box with label  
16 only printed serial numbers. Web-based allocation system will show the serial number of  
17 investigational drug which must be used to respective patients to ensure blinding.  
18  
19  
20  
21  
22  
23  
24  
25

26 We decided dosage of drug based on our previous non-randomized early phase clinical  
27 studies. On phase 1/2a clinical study, of which study design was open-label, dose-titrating  
28 study with no control group, SCI patients who were administered  $10 \mu\text{g}/\text{kg}/\text{day}$  G-CSF  
29 for 5 days showed marked elevation of white blood cell number (reached nearly  $50000/\mu\text{L}$ ,  
30 of which WBC number might cause adverse effects of G-CSF) during G-CSF  
31 administration<sup>15</sup>. Therefore we decided to withdraw additional titration. In addition, next  
32 phase of clinical study, of which design was multicenter, prospective, nonrandomized,  
33 nonblinded, comparative control study, showed suggestive efficacy of G-CSF ( $10 \mu\text{g}/\text{kg}/\text{d}$   
34 for 5 days) for acute SCI<sup>16</sup>. Based on those results, we finally decided the dosage of G-CSF  
35 as  $10 \mu\text{g}/\text{kg}/\text{d} \times 5\text{d}$  for 5 days. In the current clinical trial, the dosage of G-CSF is written as  
36  $400 \mu\text{g}/\text{m}^2/\text{d}$  ( $= 10 \mu\text{g}/\text{kg}/\text{d}$ ) according to the Japanese Pharmaceutical and Medical Device  
37 Agency (PMDA)'s instruction for consolidation with product labeling.  
38  
39  
40  
41  
42  
43  
44  
45  
46

47 We decided to 48hours after SCI as the therapeutic time window because our previous  
48 multicenter, prospective, nonrandomized, nonblinded, comparative control study, which  
49 recruited SCI patients within 48 hours after injury, showed that there was no significant  
50 difference in neurological outcome between the patient administered G-CSF very early  
51 after the injury and 48 hours after injury<sup>16</sup>.  
52  
53  
54  
55  
56  
57  
58  
59  
60

1  
2  
3  
4  
5 Allocation will be concealed between blinded evaluators of efficacy/safety and those  
6 for laboratory data, as G-CSF markedly increases white blood cell counts that can reveal  
7 patient treatment.  
8  
9

10 Our primary endpoint is changes in ASIA motor scores (international standards for  
11 neurological classification of spinal cord injury (ISNSCI) suppl. Figure 1) from baseline to  
12 3 months calculated as follows: 3-month ASIA motor score change = 3-month ASIA motor  
13 score – pretreatment ASIA motor score. To maintain consistency of neurological  
14 assessment among the each evaluators, attending lecture and e-learning (in website of  
15 International Spinal Cord Society: <http://www.elearnsoci.org/>) of ASIA/ISNSCI scoring  
16 system is mandatory for every investigators participating to the present trial.  
17  
18  
19  
20  
21  
22

23 Secondary endpoints are as follows. [1] Change in ASIA motor scores at 6 months and  
24 12 months after G-CSF administration compared with pretreatment. [2] Changes in sensory  
25 paralysis over time: change in ASIA sensory scores at 3 months, 6 months, and 12 months  
26 after G-CSF administration compared with pretreatment. [3] Severity of functional  
27 compromise because of paralysis: AIS before administration and at 3, 6, and 12 months  
28 after administration of G-CSF. [4] Percentage of responders: percentage of patients whose  
29 AIS improved by 1 grade or more at 3, 6, and 12 months after administration compared  
30 with before administration of G-CSF. [5] Neurological level of injury (NLI): percentage of  
31 patients whose NLI decreased by 1 grade of more at 3, 6, or 12 months after administration  
32 of G-CSF compared with pretreatment. [6] SCIM: change in SCIM scores at 3, 6, and 12  
33 months after G-CSF administration compared with pretreatment [7] EQ-5D: measured  
34 EQ-5D efficacy scores at 3, 6, and 12 months after G-CSF.  
35  
36  
37  
38  
39  
40  
41  
42

43 To strengthen the analysis, more strict blindness of assessment by the evaluator for  
44 outcome measures is ideal. Therefore every prior score/measurement should be blinded  
45 and/or not the same person should assess every midpoint motor/sensory functional  
46 measurement. However, PMDA instructed us to assess one patients' functional evaluation  
47 by one evaluator for consistent assessment in respective patients. PMDA considers the  
48 consistency of assessment in respective patients is more important.  
49  
50  
51  
52  
53

54 The precise explanation of abovementioned outcome measures is as followings (suppl.  
55  
56  
57

Figures). ASIA motor score is determined by examining a key muscle function within each of 10 myotomes on each side of the body on manual muscle testing (MMT) in the supine position. There is a range of score from 0 to 25 for each extremity, totaling 0 to 50 for the upper limbs and 0 to 50 for the lower limbs, resulting in total of ASIA motor score ranges from 0 to 100. This score can reflect the degree of motor impairment associated with the SCI (suppl. Figure 1). ASIA sensory scores is completed through the testing of a key point in each of the 28 dermatomes (from C2 to S4-5) on the right and left sides of the body that can be readily located in relation to bony anatomical landmarks. At each of these key points, two aspects of sensation are examined: light touch and pin prick. Appreciation of light touch and pin prick sensation at each of the key points is separately scored on a three-point scale, with comparison to the sensation on the patients' cheek as a normal frame of reference: 0 = absent, 1 = altered, 2 = normal or intact. As a result, ASIA sensory scores range from 0 to 112 (suppl. Figure 1). AIS designation is used in grading the degree of impairment: A = Complete. No sensory or motor function is preserved in the sacral segments S4-S5. B = Sensory incomplete. Sensory but not motor function is preserved below the neurological level. C = Motor incomplete. Motor function is preserved below the neurological level, and more than half of key muscle functions below the single neurological level of injury have a muscle grade less than 3 (Grades 0–2). D = Motor incomplete. Motor function is preserved below the neurological level, and at least half (half or more) of key muscle functions below the neurological level have a muscle grade >3. E = Normal. If sensation and motor function as tested are graded as normal in all segments, and the patient had prior deficits, then the AIS grade is E (suppl. Figure 1, footnote). NLI refers to the most caudal segment of the cord with intact sensation and antigravity muscle function strength, provided that there is normal (intact) sensory and motor function rostrally (suppl. Figure 1, footnote). SCIM is disability scale developed specifically for patients with spinal cord lesions in order to make the functional assessments of patients with paraplegia or tetraplegia more sensitive to changes. The SCIM includes the following areas of function: self-care (subscore (0-20), respiration and sphincter management (0-40) and mobility (0-40). Each area is scored according to its proportional weight in these patients'



1  
2  
3  
4  
5  
6 general activity. The final score ranges from 0 to 100 (suppl. Figure 2-4). EQ-5D  
7 essentially consists of 2 pages (suppl. Figure 5, 6): the EQ-5D descriptive system and the  
8 EQ visual analogue scale (EQ VAS). The descriptive system comprises five dimensions:  
9 mobility, self-care, usual activities, pain/discomfort and anxiety/depression. Each  
10 dimension has 5 levels: no problems, slight problems, moderate problems, severe problems  
11 and extreme problems. The patient is asked to indicate his/her health state by ticking the  
12 box next to the most appropriate statement in each of the five dimensions. This decision  
13 results in a 1-digit number that expresses the level selected for that dimension. The digits  
14 for the five dimensions can be combined into a 5-digit number that describes the patient's  
15 health state and can be converted to efficacy score with calibration scale (ranges -0.111 to  
16 1.000). The EQ VAS records the patient's self-rated health on a vertical visual analogue  
17 scale, where the endpoints are labelled 'The best health you can imagine' and 'The worst  
18 health you can imagine'. The VAS can be used as a quantitative measure of health outcome  
19 that reflect the patient's own judgement.  
20  
21  
22  
23  
24  
25  
26  
27  
28  
29

30  
31 Each group will include 44 patients (88 patients in total). Our protocol was approved by  
32 PMDA and this trial will be funded by the Center for Clinical Trials, Japan Medical  
33 Association.  
34  
35  
36  
37  
38

### 39 *Inclusion*

40 Inclusion criteria are as follows. [1] Patients with cervical SCI (severity of AIS B/C)  
41 within 48 h of injury. [2] Patients reassessed for neurological status at 48 h after injury, and  
42 those whose palsy is AIS B/C will be enrolled. [3] Patients with neurological level of injury  
43 between C4 and C7. [4] Patients with age of 16 to 85 years. [5] Patients who agree to  
44 participate in the current trial and from whom informed consent was obtained orally and in  
45 writing. [6] Patients who can be followed up for 12 months after SCI.  
46  
47  
48  
49  
50  
51

### 52 *Exclusion*

53 Exclusion criteria are as follows. [1] Patients with neurological recovery to AIS D at  
54  
55  
56  
57

1  
2  
3  
4  
5  
6 neurological reassessment 48 h after SCI, because only AIS B/C patients will be included to  
7 standardize the severity of paresis in order to stratify the patients at the initiation of drug  
8 administration. [2] Allergy to G-CSF. [3] Hematological malignancy, [4] within 6 months  
9 after invasive coronary intervention, [5] splenomegaly, or [6] pregnancy, [7] consciousness  
10 impairment, [8] neurological disorders that can affect neurological evaluation in the present  
11 trial, [9] fracture of extremities that can affect the neurological evaluation and [10] massive  
12 dose administration of MPSS. Exclusion criteria 2 - 6 are set for safety, criteria 1, 7 - 9 are  
13 set to maintain homogeneity of the patient population enrolled, criteria 7-9 are set for  
14 maintenance of accuracy of functional assessment, criteria 7 is set to obtain patients' own  
15 informed consent upon participation to the trial and criteria 10 is set to omit the possible  
16 interference of MPSS on outcome assessment.  
17  
18  
19  
20  
21  
22  
23  
24  
25

### 26 *Concealment*

27  
28 Patients will be administered drug or placebo and be evaluated in a double-blinded  
29 manner. An evaluator blinded to the treatment will take charge of patient evaluation  
30 including clinical findings and paresis, without laboratory data because G-CSF induces an  
31 apparent increase of white blood cell count that makes it easy to distinguish G-CSF and  
32 placebo treatment. Therefore, a non-blinded evaluator for laboratory data will be assigned  
33 to evaluate laboratory data alone. From a safety point-of view, the dose of G-CSF will be  
34 modulated according to excessive increase of white blood cell count. Therefore, a  
35 non-blinded evaluator will instruct the pharmacy to modulate the dose of G-CSF based on  
36 white blood cell count.  
37  
38  
39  
40  
41  
42  
43  
44

### 45 *Sample Size Calculation*

46  
47 The target sample size for this randomized trial is 88. This number is based on the  
48 results of previous clinical trials<sup>16</sup>. The estimated group difference ( $\pm$  standard deviation) of  
49 change in ASIA motor scores from baseline to 3 months is 13.9 ( $\pm$  21.9). A sample size of  
50 44 patients in each group will provide 80% power to detect a difference of the change in  
51 ASIA motor scores between the G-CSF and the placebo treatments, using a mixed-effects  
52  
53  
54  
55  
56  
57

1  
2  
3  
4  
5 models for repeated measures (MMRM) at a two-sided 5% level of significance. A  
6 common correlation of 0.25 at each time point is assumed. A dropout rate of 10% is  
7 allowed. Thus, the total sample size of 88 patients is required for the trial.  
8  
9

### 10 11 12 *Statistical analyses*

13  
14 The analyses of the primary and secondary end points will be performed as  
15 intention-to-treat analyses in a full analysis set, which includes all patients who: (1) took at  
16 least one course of treatment during the study; (2) do not present any serious violation of  
17 the study protocol; and (3) have data collected after commencement of treatment. For the  
18 baseline characteristics, summary statistics will comprise frequencies and proportions for  
19 categorical variables, and means and SDs for continuous variables. The patient  
20 characteristics will be compared using a chi-square test for categorical variables, and a *t* test  
21 or Wilcoxon rank sum test for continuous variables. Missing data including loss to  
22 follow-up and missing measurement will be supplemented with MMRM.  
23  
24

25 For the primary analysis, aimed at comparing treatment effects, a change in ASIA motor  
26 score from baseline to 3 months and its 95% confidence interval (CI) will be estimated  
27 using the MMRM. To test for significant association of the primary endpoint, a mixed  
28 effects model for repeated measures with an unstructured covariance matrix will be applied  
29 to adjust for age (<65 years or ≥65 years) and AIS at 48 h after the injury (B or C).  
30  
31

32 For the secondary analysis, the change in ASIA motor score will be compared using a  
33 Student *t* test and the 95% CI will be estimated. The same method will be applied to change  
34 in sensory score, SCIM, and EQ-5D. A chi-squared test will be applied to the frequencies of  
35 the responder in AIS and of the improvement in NLI. The frequency of AIS will be  
36 summarized. The frequency of AEs will be compared using a Fisher exact test.  
37  
38

39 All comparisons are planned and all *p* values will be two sided.  $p < 0.05$  will be  
40 considered significant. All statistical analyses will be performed using SAS software  
41 (version 9.4; SAS Institute, Cary, NC, USA). The statistical analysis plan will be developed  
42 by the principal investigator and the biostatistician before completion of patient recruitment  
43 and fixing of data.  
44  
45  
46  
47  
48  
49  
50  
51  
52  
53  
54  
55  
56  
57

### *Data Monitoring Committee*

The data monitoring committee consists of three clinical trial specialists, including a biostatistician, who are independent from the current study. The committee will meet at least 2 times per year and all the data obtained by the current trial will be checked by the committee.

### *Adverse Events*

As for safety evaluation, adverse events will be collected as follows. “Adverse events” refers to any untoward symptom or disease or signs of such (including clinical laboratory data abnormalities) in a clinical investigation subject after informed consent and does not necessarily have a causal relationship with the investigational product (G-CSF).

Increases in white blood counts will be considered an adverse event only when the count exceeds 50,000/ $\mu$ L from the perspective of a pharmacological effect of G-CSF, and any values below this will not be handled as an adverse event. Anaphylaxis and adult respiratory distress syndrome are the most representative G-CSF-related severe adverse events to be paid full attention.

All adverse events will code terminology used by the investigators according to the ICH International Medical Dictionary for Regulatory Activities Japanese version (MedDRA/J).

## **Ethics and Dissemination**

### *Ethics*

The study was approved by the Institutional Review Board (IRB) of each institutions involved to the present trial and will be conducted according to the principles of the World Medical Association (WMA) Declaration of Helsinki—Ethical Principles for Medical Research Involving Human Subjects with the amendments made in Seoul, South Korea, October 2008, with a Note of Clarification on Paragraph 29 added by the WMA General Assembly, Washington 2002; Note of Clarification on Paragraph 30 added by the WMA General Assembly, Tokyo 2004, and in accordance with the Japanese Medical Research

1  
2  
3  
4  
5 Involving Human Subjects Act (WMO) and other guidelines, regulations and Acts.  
6  
7

8  
9 *Patient informed consent*

10 The principal investigator will try to prepare the informed consent form and other  
11 explanatory materials in as simple language as possible in order to obtain informed consent  
12 from the patient and the patient's legal representative. In case that trial participants cannot  
13 sign the informed consent form due to upper extremity palsy caused by SCI, allograph by  
14 patients' representative will be allowed.  
15  
16  
17  
18

19  
20  
21 *Public Disclosure and Publication Policy*

22 Results of the clinical study will be submitted to the head of the respective clinical  
23 study site as a report after conclusion of the clinical study by the sponsor-investigator  
24 (includes study coordinating investigator). Even if the results are not favorable despite  
25 conducting the clinical study properly, the data will be published as a paper. Other  
26 sponsor-investigators (including the clinical study coordinating investigator), if they plan to  
27 publicize the data from this study in a specialized academic society conference or other  
28 external site, must first obtain permission from the other principal investigators and  
29 investigational product provider. In publicizing the results, the confidentiality of the  
30 subjects will be maintained and proofread in advance by the other sponsor-investigators  
31 (includes coordinating investigator) and investigational product provider.  
32  
33  
34  
35  
36  
37  
38  
39  
40  
41

42 **Discussion**

43 The current trial is a confirmative trial to elucidate the therapeutic efficacy of G-CSF  
44 for SCI. If the current trial can successfully show significant improvement of motor  
45 paralysis of SCI by G-CSF, we will move forward to drug approval application to the  
46 Ministry for Health and Labor, Japan. The entire protocol of the current trial was approved  
47 beforehand for the initiation of the current trial by the Japanese Pharmaceutical and  
48 Medical Device Agency (PMDA). The PMDA will also permit a drug approval application  
49 if significant efficacy of G-CSF for SCI is proven.  
50  
51  
52  
53  
54  
55  
56  
57

1  
2  
3  
4  
5 The current trial is an important milestone for SCI clinics and research to explore  
6 G-CSF for SCI.  
7  
8  
9

### 10 *Trial Status*

11 The present trial is now on-going.  
12  
13

### 14 *Trial Sites*

15 Nineteen major hospitals in Japan constituting the G-SPIRIT study group as follows:  
16 Tohoku University Hospital, Miyagi; Niigata University, Niigata; Dokkyo University  
17 Hospital, Tochigi; Tsukuba University Hospital, Ibaraki; Tsukuba Medical Center, Ibaraki;  
18 Chiba University Hospital, Chiba; Funabashi Municipal Medical Center, Chiba; Kimitsu  
19 Chuo Hospital, Chiba; Chiba Rosai Hospital, Chiba; Tokai University Hospital, Kanagawa;  
20 Hamamatsu University Hospital, Shizuoka; Gifu University Hospital, Gifu; Chubu Rosai  
21 Hospital, Aichi; Mie University Hospital, Mie; Kanazawa Medical Collage, Ishikawa;  
22 Kobe Red Cross Hospital, Hyogo; Hiroshima University Hospital, Hiroshima; Yamaguchi  
23 University Hospital, Yamaguchi; and Nagasaki Rosai Hospital, Nagasaki.  
24  
25  
26  
27  
28  
29  
30  
31  
32

### 33 **Funding Statement**

34 This trial is supported by Center for Clinical trials, Japan Medical Association, Japan.  
35  
36

### 37 **Competing Interests**

38 No authors have any competing interests to declare.  
39  
40  
41

### 42 **Contributorship Statement**

43 MK, TF and MY contributed to planning and conduct of the present trial and to reporting  
44 the present protocol paper. HH, TS, YF, MH and ST contributed to conception and design  
45 of the present trial protocol and to reporting the present protocol paper. YI, JS, MK, SO,  
46 YM, TA, KW, TH, MO, HS, TM, IT, NK, MK. YO, TS, MY, MF, KY, DS, HT, DT, SI,  
47 HM, HU, FA, YS, IA, YT, MM, JS, YS, SI, HS, KT, YI, FN, MH, TO, FH, TF, KK, MW,  
48 HK, YM, YY, DT, TH, SK, GY, SO, TB, HA, KA, EK, HI, TS, AS, YI, TK, SO, NT, KN,  
49 NK, SK, HB, TO, HK, TY, IK, KY, TM, TM, IM, HK, TA, KH, TE, TS, MM, KF, SN, CI,  
50  
51  
52  
53  
54  
55  
56  
57

1  
2  
3  
4  
5 TT, TK, HS, NN and MF contributed to conducting the present trial and to acquisition of  
6 data.  
7  
8  
9

## 10 References

- 11 1. Oyinbo CA. Secondary injury mechanisms in traumatic spinal cord injury: a nugget  
12 of multiply cascade. *Acta Neurobiol Exp* 2011;71:281-299.
- 13 2. Karsy M, Hawryluk G. Pharmacologic Management of Acute Spinal Cord Injury.  
14 *Neurosurg Clin N Am* 2017;28:49-62. doi: 10.1016/j.nec.2016.07.002.
- 15 3. Bracken MB, Shepard MJ, Collins WF, et al. A randomized controlled trial of  
16 methylprednisolone or naloxone in the treatment of acute spinal cord injury: results  
17 of the second national acute spinal cord injury study. *N Engl J Med* 1990;322:  
18 1405-1411.
- 19 4. Matsumoto T, Tamaki T, Kawakami M, et al. Early complications of high-dose  
20 methyl-prednisolone sodium succinate treatment in the follow-up of acute cervical  
21 spinal cord injury. *Spine* 2001;26: 426-430.
- 22 5. Hurlbert RJ, Hadley, Walters BC, et al. Pharmacological Therapy for Acute Spinal  
23 cord Injury. *Neurosurgery* 2013;72: 93-105.
- 24 6. Nicola NA, Metcalf D, Matsumoto M, Johnson GR. Purification of a factor inducing  
25 differentiation in murine myelomonocytic leukemia cells. Identification as  
26 granulocyte colony-stimulating factor. *J Biol Chem* 1983;258: 9017-9023.
- 27 7. Roberts AW: G-CSF: a key regulator of neutrophil production, but that's no all!  
28 *Growth Factors* 2005;23: 33-41.
- 29 8. Kawada H, Takizawa S, Takanashi T, et al. Administration of hematopoietic  
30 cytokines in the subacute phase after cerebral infarction is effective for functional  
31 recovery facilitating proliferation of intrinsic neural stem/progenitor cells and  
32 transition of bone marrow-derived neuronal cells. *Circulation* 2006;113: 701-710.
- 33 9. Schneider A, Kruger C, Steigleder T, et al. The hematopoietic factor G-CSF is a  
34 neuronal ligand that counteracts programmed cell death and drives neurogenesis. *J*  
35 *Clin Invest* 2005;115: 2083-2098.
- 36  
37  
38  
39  
40  
41  
42  
43  
44  
45  
46  
47  
48  
49  
50  
51  
52  
53  
54  
55  
56  
57

10. Shyu WC, Lin SZ, Lee CC, Liu DD, Li H. Granulocyte colony-stimulating factor for acute ischemic stroke: a randomized controlled trial. *CMAJ* 2006;174: 927-933.
11. Koda M, Nishio Y, Kamada T, et al. Granulocyte colony-stimulating factor (G-CSF) mobilizes bone marrow-derived cells into injured spinal cord and promotes functional recovery after compression-induced spinal cord injury in mice. *Brain Res* 2007;1149: 223-231.
12. Nishio Y, Koda M, Kamada T, et al. Granulocyte colony-stimulating factor (G-CSF) attenuates neuronal death and promotes functional recovery after spinal cord injury in mice. *J Neuropathol Exp Neurol* 2007;66: 724-731.
13. Kadota R, Koda M, Kawabe J, et al. Granulocyte colony-stimulating factor (G-CSF) protects oligodendrocyte and promotes hindlimb functional recovery after spinal cord injury in rats. *PLoS One* 2012;7:e50391.
14. Kawabe J, Koda M, Hashimoto M, et al. Granulocyte colony-stimulating factor (G-CSF) exerts neuroprotective effects via promoting angiogenesis after spinal cord injury in rats. *J Neurosurg Spine* 2011;15: 414-421.
15. Takahashi H, Yamazaki M, Okawa A, et al. Neuroprotective therapy using granulocyte colony-stimulating factor for acute spinal cord injury: a phase I/IIa clinical trial. *Eur Spine J* 2012;21:2580-2587.
16. Inada T, Takahashi H, Yamazaki M, et al. A multicenter prospective non-randomized controlled clinical trial to prove neurotherapeutic effects of granulocyte colony-stimulating factor (G-CSF) for acute spinal cord injury: Analyses of follow-up cases after at least one year. *Spine* 2014;39:213-219.

#### Figure legend

Schematic diagram showing trial timeline.



1  
2  
3  
4  
5  
6  
7  
8  
9  
10  
11  
12  
13  
14  
15  
16  
17  
18  
19  
20  
21  
22  
23  
24  
25  
26  
27  
28  
29  
30  
31  
32  
33  
34  
35  
36  
37  
38  
39  
40  
41  
42  
43  
44  
45  
46  
47  
48  
49  
50  
51  
52  
53  
54  
55  
56  
57  
58  
59  
60

**INTERNATIONAL STANDARDS FOR NEUROLOGICAL CLASSIFICATION OF SPINAL CORD INJURY (ISNCSCI)**

**ASIA** AMERICAN SPINAL INJURY ASSOCIATION **ISICOS** INTERNATIONAL STANDARDS FOR CLASSIFICATION OF SPINAL CORD INJURY

Patient Name \_\_\_\_\_ Date/Time of Exam \_\_\_\_\_  
 Examiner Name \_\_\_\_\_ Signature \_\_\_\_\_

**RIGHT**

**MOTOR KEY MUSCLES**

Elbow flexors C5  
 Wrist extensors C6  
 Elbow extensors C7  
 Finger flexors C8  
 Finger abductors (little finger) T1

**UER**  
(Upper Extremity Right)

**LER**  
(Lower Extremity Right)

Hip flexors L2  
 Knee extensors L3  
 Ankle dorsiflexors L4  
 Long toe extensors L5  
 Ankle plantar flexors S1

(VAC) Voluntary anal contraction (Yes/No)

**RIGHT TOTALS**  
(MAXIMUM) (50) (56) (56)

**SENSORY KEY SENSORY POINTS**  
Light Touch (LTR) Pin Prick (PPR)

C2  
C3  
C4  
C5  
C6  
C7  
C8  
T1  
T2  
T3  
T4  
T5  
T6  
T7  
T8  
T9  
T10  
T11  
T12  
L1  
L2  
L3  
L4  
L5  
S1  
S2  
S3  
S4-5

**SENSORY KEY SENSORY POINTS**  
Light Touch (LTL) Pin Prick (PPL)

C2  
C3  
C4  
C5  
C6  
C7  
C8  
T1  
T2  
T3  
T4  
T5  
T6  
T7  
T8  
T9  
T10  
T11  
T12  
L1  
L2  
L3  
L4  
L5  
S1  
S2  
S3  
S4-5

**LEFT**

Elbow flexors C5  
 Wrist extensors C6  
 Elbow extensors C7  
 Finger flexors C8  
 Finger abductors (little finger) T1

**UEL**  
(Upper Extremity Left)

**LEL**  
(Lower Extremity Left)

Hip flexors L2  
 Knee extensors L3  
 Ankle dorsiflexors L4  
 Long toe extensors L5  
 Ankle plantar flexors S1

(DAP) Deep anal pressure (Yes/No)

**LEFT TOTALS**  
(MAXIMUM) (56) (56) (50)

**MOTOR SUBSCORES**      **SENSORY SUBSCORES**

UER  + UEL  = UEMS TOTAL       LER  + LEL  = LEMS TOTAL       LTR  + LTL  = LT TOTAL       PPR  + PPL  = PP TOTAL

MAX (25)      (25)      (50)      MAX (25)      (25)      (50)      MAX (56)      (56)      (112)      MAX (56)      (56)      (112)

**NEUROLOGICAL LEVELS**      **3. NEUROLOGICAL LEVEL OF INJURY (NLI)**      **4. COMPLETE OR INCOMPLETE?**      **5. ASIA IMPAIRMENT SCALE (AIS)**

1. SENSORY  R  L      Incomplete = Key sensory or motor function in S4-5      (In complete/incomplete only)      ZONE OF PARTIAL PRESERVATION      SENSORY  R  L

2. MOTOR  R  L      Most caudal level with any innervation      MOTOR  R  L

This form may be copied freely but should not be altered without permission from the American Spinal Injury Association.      REV 02/13

274x206mm (300 x 300 DPI)

**セルフケア**

- (1) 食事（切る、容器を開ける、飲み物を注ぐ、食べ物を口に運ぶ、飲み物の入ったコップをもつ）
  - 0. 静脈栄養または胃瘻が必要である、あるいは経口摂取において全介助を要する。
  - 1. 食べたり飲んだりすること、または補助器具の装着に部分介助を要する。
  - 2. 食べることは自立、補助器具を必要とするか、または食べ物を切ったり注いだりすること、容器の開閉にのみ解介助を要する。
  - 3. 食べることも飲むことも自立、介助や補助器具を必要としない。
- (2) 入浴（頭と体を石鹸でこすって洗い、乾かす、蛇口の開け閉め） A—上半身、B—下半身
  - A. 0. 全介助を要する。
    - 1. 部分介助を要する。
    - 2. 補助器具、または特定の環境（例えば、手すりや椅子）が整っていれば、自立して体を洗う。
    - 3. 自立して体を洗う。（通常、健常者なら用いることのない）補助器具や特定の環境設定は不要
  - B. 0. 全介助を要する。
    - 1. 部分介助を要する。
    - 2. 補助器具、または特定の環境が整っていれば、自立して体を洗う。
    - 3. 自立して体を洗う。補助器具や特定の環境設定は不要
- (3) 更衣（衣服、靴、常用している装具の着脱） A—上半身、B—下半身
  - A. 0. 全介助を要する。
    - 1. ボタン、ファスナー、ひものない衣服で部分介助を要する。
    - 2. ボタン、ファスナー、ひものない衣服であれば自立、補助器具と特定の環境設定、またはそのどちらかが必要。
    - 3. ボタン、ファスナー、ひものない衣服であれば自立、補助器具も特定の環境設定も不要、ボタン、ファスナー、ひもの扱いにだけ介助、補助器具、または特定の環境設定が必要。
    - 4.（衣類の種類を問わず）自立して着替える。補助器具も特定の環境設定も不要。
  - B. 0. 全介助を要する。
    - 1. ボタン、ファスナー、ひものない衣服で部分介助を要する。
    - 2. ボタン、ファスナー、ひものない衣服であれば自立、補助器具と特定の環境設定、またはそのどちらかが必要。
    - 3. ボタン、ファスナー、ひものない衣服であれば自立、補助器具も特定の環境設定も不要、ボタン、ファスナー、ひもの扱いにだけ介助、補助器具、または特定の環境設定が必要。
    - 4.（衣類の種類を問わず）自立して着替える。補助器具も特定の環境設定も不要。
- (4) 整容（手洗い、洗顔、歯磨き、整髪、髭剃り、化粧）
  - 0. 全介助を要する。
  - 1. 部分介助を要する。
  - 2. 補助器具があれば自立して整容動作をおこなう。
  - 3. 補助器具を用いずに自立して整容動作をおこなう。

小計 (0-20)

**呼吸と排泄管理**

- (5) 呼吸
  - 0. 気管チューブと持続的補助換気または間欠的補助換気が必要。
  - 1. 気管チューブを装着して自己呼吸、酸素を必要としたり、咳嗽時または気管チューブの管理に多大な介助を必要とする。
  - 2. 気管チューブを装着して自己呼吸、咳嗽時または気管チューブの管理に少しか介助を必要としない。
  - 3. 気管チューブなしで自己呼吸、酸素、咳嗽時の多大な介助、マスク（例：終末呼吸陽圧 PEEP）、または間欠的補助換気 (BiPAP) を必要とする。
  - 4. 気管チューブなしで自己呼吸、介助または咳嗽刺激を少しか必要としない。
  - 5. 介助も器具もなしで自己呼吸。

190x254mm (300 x 300 DPI)

1  
2  
3  
4  
5  
6  
7  
8  
9  
10  
11  
12  
13  
14  
15  
16  
17  
18  
19  
20  
21  
22  
23  
24  
25  
26  
27  
28  
29  
30  
31  
32  
33  
34  
35  
36  
37  
38  
39  
40  
41  
42  
43  
44  
45  
46  
47  
48  
49  
50  
51  
52  
53  
54  
55  
56  
57  
58  
59  
60

- (6) 排尿管理
  - 0. 留置カテーテル
  - 3. 残尿量 > 100cc. 不定期導尿または介助による間欠的導尿.
  - 6. 残尿量 > 100cc または間欠的の自己導尿. 集尿器<sup>1</sup>をあてがう際の介助は必要.
  - 9. 間欠的の自己導尿. 集尿器を使用する. 器具をあてがう際の介助は不要.
  - 11. 間欠的の自己導尿. 導尿と導尿の間には失禁なし. 集尿器は使用しない.
  - 13. 残尿量 < 100cc. 集尿器のみ必要. 集尿器の取扱いには介助不要.
  - 15. 残尿量 < 100cc. 失禁なし. 集尿器を使用しない.
- (7) 排便管理
  - 0. 排便が不規則またはごく低頻度 (3 日に 1 回未満).
  - 5. 規則的ながら. ( 座薬を挿入するなどに ) 介助を要する. 失敗はまれ ( 月 2 回未満 ).
  - 8. 規則的な排便で. 介助を要しない. 失敗はまれ ( 月 2 回未満 ).
  - 10. 規則的な排便で. 介助を要しない. 失敗はなし.
- (8) トイレの使用 ( 会陰部の清潔. 使用前後での衣服の扱い. ナプキンまたはおむつの使用 )
  - 0. 全介助を要する.
  - 1. 部分介助を要する. 自分でお尻を拭けない.
  - 2. 部分介助を要する. 自立してお尻を拭ける.
  - 4. 自立してトイレを使用するも. 補助器具または特別な環境 ( 例: 手すり ) が整っている必要あり.
  - 5. 自立してトイレを使用. 補助器具も特別な環境が整っている必要もない.

小計 (0-40)

**移動 ( 室内とトイレ )**

- (9) ベッド上での姿勢変換と褥瘡予防動作
  - 0. ベッド上で上半身の向きを変えること. 下半身の向きを変えること. 起き上がること. および車椅子上で  
のフッシュアップのすべての動作に介助が必要. 補助器具の要否は問わないが. 電動器具は用いない.
  - 2. 介助なくできる動作が 1 つある.
  - 4. 介助なくできる動作が 2 つまたは 3 つある.
  - 6. ベッド上動作と除圧動作はすべて自立しておこなう.
- (10) 移乗: ベッド-車椅子 ( 車いすのブレーキ操作. フットレストの跳ね上げ. アームレストの脱着. 乗り移り. 足の持ち上げ )
  - 0. 全介助を要する.
  - 1. 部分介助. 監視. および補助器具 ( 例: スライディングボード ) のすべて. もしくは. そのいずれかが必要.
  - 2. 自立 ( または車椅子を必要としない ).
- (11) 移乗: 車椅子-トイレ. 浴槽 ( トイレ用車椅子<sup>1</sup> を使用している場合は. それへのからの乗り移り. 通常の車椅子を使用している場合は. 車椅子のブレーキ操作. フットレストの跳ね上げ. アームレストの脱着. 乗り移り. 足の持ち上げ )
  - 0. 全介助を要する.
  - 1. 部分介助. 監視. および補助器具 ( 例: 手すり ) のすべて. もしくは. そのいずれかが必要.
  - 2. 自立 ( または車椅子を必要としない ).

**移動 ( 屋内と屋外. 平らな所で )**

- (12) 屋内の移動
  - 0. 全介助を要する.
  - 1. 電動車椅子を必要とするか. または手動車椅子を操作するのに部分介助を要する.
  - 2. 手動車椅子で自立して移動する.
  - 3. 歩行時に監視を必要とする ( 器具の要否は問わない ).
  - 4. 歩行器または松葉杖で歩行 ( 大振り・小振り歩行 ).
  - 5. 松葉杖または T 字杖 2 本で歩行 ( 交互歩行 ).
  - 6. T 字杖 1 本で歩行.
  - 7. 下肢装具のみを必要とする.
  - 8. 歩行補助具なしで歩行.

190x254mm (300 x 300 DPI)

1  
2  
3  
4  
5  
6  
7  
8  
9  
10  
11  
12  
13  
14  
15  
16  
17  
18  
19  
20  
21  
22  
23  
24  
25  
26  
27  
28  
29  
30  
31  
32  
33  
34  
35  
36  
37  
38  
39  
40  
41  
42  
43  
44  
45  
46  
47  
48  
49  
50  
51  
52  
53  
54  
55  
56  
57  
58  
59  
60

- (13) まとまった距離の移動 (10~100m)
  - 0. 全介助を要する。
  - 1. 電動車椅子を必要とするか、または手動車椅子を操作するのに部分介助を要する。
  - 2. 手動車椅子で自立して移動する。
  - 3. 歩行時に監視を必要とする(器具の要否は問わない)。
  - 4. 歩行器または松葉杖で歩行(大振り・小振り歩行)。
  - 5. 松葉杖または T 字杖 2 本で歩行(交互歩行)。
  - 6. T 字杖 1 本で歩行。
  - 7. 下肢装具のみを必要とする。
  - 8. 歩行補助具なしで歩行。
  
- (14) 屋外の移動 (100m 以上)
  - 0. 全介助を要する。
  - 1. 電動車椅子を使用するか、または手動車椅子を操作するのに部分介助を要する。
  - 2. 手動車椅子で自立して移動する。
  - 3. 歩行時に監視を必要とする(器具の要否は問わない)。
  - 4. 歩行器または松葉杖で歩行(大振り・小振り歩行)。
  - 5. 松葉杖または T 字杖 2 本で歩行(交互歩行)。
  - 6. T 字杖 1 本で歩行。
  - 7. 下肢装具のみを必要とする。
  - 8. 歩行補助具なしで歩行。
  
- (15) 階段昇降
  - 0. 階段の上り下り不能。
  - 1. 人に支えられるか、またはその監視下で少なくとも 3 段は上り下りできる。
  - 2. 手すりにつかまったり、松葉杖や T 字杖を用いて少なくとも 3 段は上り下りできる。
  - 3. 支えも監視もなく少なくとも 3 段は上り下りできる。
  
- (16) 移乗: 車椅子一車 (車に近づく、車椅子のブレーキ操作、アームレストおよびフットレストの取り外し、車へのからの乗り移り、車椅子の積み降ろし)
  - 0. 全介助を要する。
  - 1. 部分介助、監視、および補助器具のすべて、もしくはいずれかを必要とする。
  - 2. 自立して移乗する。補助器具を必要としない(または車椅子を必要としない)。
  
- (17) 移乗: 床一車椅子
  - 0. 介助を要する。
  - 1. 補助器具の有無にかかわらず、自立して移乗する(または車椅子を必要としない)。

小計(0-40)

SCIM 合計スコア(0-100)

訳者注  
 1. 夜間のみ BPAP を使用している場合も 0 点とする  
 2. 原書では external drainage instrument、体外からあててるのみが非圧力器具集束器のこと指す。例えば、コンドーム型集束器、しびんなどが含まれる。尿道や膀胱に挿入するカテーテルは含まれない  
 3. ベッド横やひもなどを使ってもよい  
 4. 原書では toilet wheelchair、便器や浴槽に移乗することなく、乗車したまま洋式便器が使用でき、シャワー浴にも使える車椅子のこと。介助型と自立型がある。わが国ではトイレ兼用シャワーキヤリー(介助型)が用いられることがある  
 SCIM (Version 3.0) 日本語版 朝川律之・黒川真希子・出田良輔・星宇明光訳  
 [ Translated by permission from Dr. Amiram Catz, Loewenstein Rehabilitation Hospital, Raanana, Israel ]  
 [ Reprinted by permission from Macmillan Publishers Ltd. Spinal cord 40: 396-407, copyright 2002 ]

190x254mm (300 x 300 DPI)

以下のそれぞれの項目の一つの四角に（このように☐）印をつけて、あなた自身の今日の健康状態を最も良く表している記述を示して下さい。

**移動の程度**

歩き回るのに問題はない

歩き回るのにいくらか問題がある

ベッド（床）に寝たきりである

**身の回りの管理**

身の回りの管理に問題はない

洗面や着替えを自分でするのにいくらか問題がある

洗面や着替えを自分でできない

**ふだんの活動**（例：仕事、勉強、家事、家族・余暇活動）

ふだんの活動を行うのに問題はない

ふだんの活動を行うのにいくらか問題がある

ふだんの活動を行うことができない

**痛み／不快感**

痛みや不快感はない

中程度の痛みや不快感がある

ひどい痛みや不快感がある

**不安／ふさぎ込み**

不安でもふさぎ込んでもいない

中程度に不安あるいはふさぎ込んでいる

ひどく不安あるいはふさぎ込んでいる

1  
2  
3  
4  
5  
6  
7  
8  
9  
10  
11  
12  
13  
14  
15  
16  
17  
18  
19  
20  
21  
22  
23  
24  
25  
26  
27  
28  
29  
30  
31  
32  
33  
34  
35  
36  
37  
38  
39  
40  
41  
42  
43  
44  
45  
46  
47  
48  
49  
50  
51  
52  
53  
54  
55  
56  
57  
58  
59  
60

健康状態がどのくらい良いか悪いかを表わしてもらうために、( 温度計に似たような ) 目盛を描きました。目盛には、あなたの想像できる最も良い状態として 100、あなたの想像できる最も悪い状態として 0 が付けられています。

あなたの今日の健康状態がどのくらい良いか悪いかを、あなたの考えでこの目盛上に示して下さい。下の「あなたの今日の健康状態」と書かれた四角から、あなたの現在の健康状態のよし悪しを示す目盛上の点まで、線を引いて下さい。

**あなたの  
今日の  
健康状態**

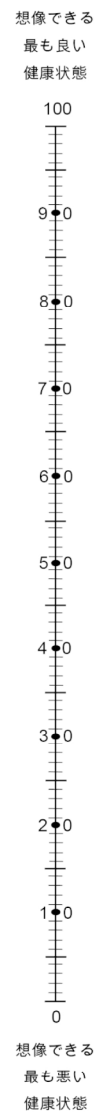

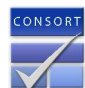

## CONSORT 2010 checklist of information to include when reporting a randomised trial\*

| Section/Topic                    | Item No | Checklist item                                                                                                                                                                              | Reported on page No |
|----------------------------------|---------|---------------------------------------------------------------------------------------------------------------------------------------------------------------------------------------------|---------------------|
| <b>Title and abstract</b>        |         |                                                                                                                                                                                             |                     |
|                                  | 1a      | Identification as a randomised trial in the title                                                                                                                                           | 1                   |
|                                  | 1b      | Structured summary of trial design, methods, results, and conclusions (for specific guidance see CONSORT for abstracts)                                                                     | 3                   |
| <b>Introduction</b>              |         |                                                                                                                                                                                             |                     |
| Background and objectives        | 2a      | Scientific background and explanation of rationale                                                                                                                                          | 4-5                 |
|                                  | 2b      | Specific objectives or hypotheses                                                                                                                                                           | 6                   |
| <b>Methods</b>                   |         |                                                                                                                                                                                             |                     |
| Trial design                     | 3a      | Description of trial design (such as parallel, factorial) including allocation ratio                                                                                                        | 6                   |
|                                  | 3b      | Important changes to methods after trial commencement (such as eligibility criteria), with reasons                                                                                          | N/A                 |
| Participants                     | 4a      | Eligibility criteria for participants                                                                                                                                                       | 7                   |
|                                  | 4b      | Settings and locations where the data were collected                                                                                                                                        | 11                  |
| Interventions                    | 5       | The interventions for each group with sufficient details to allow replication, including how and when they were actually administered                                                       | 6-7                 |
| Outcomes                         | 6a      | Completely defined pre-specified primary and secondary outcome measures, including how and when they were assessed                                                                          | 6-7                 |
|                                  | 6b      | Any changes to trial outcomes after the trial commenced, with reasons                                                                                                                       | N/A                 |
| Sample size                      | 7a      | How sample size was determined                                                                                                                                                              | 8                   |
|                                  | 7b      | When applicable, explanation of any interim analyses and stopping guidelines                                                                                                                | N/A                 |
| <b>Randomisation:</b>            |         |                                                                                                                                                                                             |                     |
| Sequence generation              | 8a      | Method used to generate the random allocation sequence                                                                                                                                      | 6                   |
|                                  | 8b      | Type of randomisation; details of any restriction (such as blocking and block size)                                                                                                         | 6                   |
| Allocation concealment mechanism | 9       | Mechanism used to implement the random allocation sequence (such as sequentially numbered containers), describing any steps taken to conceal the sequence until interventions were assigned | 8                   |
| Implementation                   | 10      | Who generated the random allocation sequence, who enrolled participants, and who assigned participants to interventions                                                                     | 6                   |
| Blinding                         | 11a     | If done, who was blinded after assignment to interventions (for example, participants, care providers, those                                                                                | 8                   |

|                                                      |     |                                                                                                                                                   |     |
|------------------------------------------------------|-----|---------------------------------------------------------------------------------------------------------------------------------------------------|-----|
|                                                      |     | assessing outcomes) and how                                                                                                                       |     |
|                                                      | 11b | If relevant, description of the similarity of interventions                                                                                       | N/A |
| Statistical methods                                  | 12a | Statistical methods used to compare groups for primary and secondary outcomes                                                                     | 8-9 |
|                                                      | 12b | Methods for additional analyses, such as subgroup analyses and adjusted analyses                                                                  | N/A |
| <b>Results</b>                                       |     |                                                                                                                                                   |     |
| Participant flow (a diagram is strongly recommended) | 13a | For each group, the numbers of participants who were randomly assigned, received intended treatment, and were analysed for the primary outcome    | N/A |
|                                                      | 13b | For each group, losses and exclusions after randomisation, together with reasons                                                                  | N/A |
| Recruitment                                          | 14a | Dates defining the periods of recruitment and follow-up                                                                                           | N/A |
|                                                      | 14b | Why the trial ended or was stopped                                                                                                                | N/A |
| Baseline data                                        | 15  | A table showing baseline demographic and clinical characteristics for each group                                                                  | N/A |
| Numbers analysed                                     | 16  | For each group, number of participants (denominator) included in each analysis and whether the analysis was by original assigned groups           | N/A |
| Outcomes and estimation                              | 17a | For each primary and secondary outcome, results for each group, and the estimated effect size and its precision (such as 95% confidence interval) | N/A |
|                                                      | 17b | For binary outcomes, presentation of both absolute and relative effect sizes is recommended                                                       | N/A |
| Ancillary analyses                                   | 18  | Results of any other analyses performed, including subgroup analyses and adjusted analyses, distinguishing pre-specified from exploratory         | N/A |
| Harms                                                | 19  | All important harms or unintended effects in each group (for specific guidance see CONSORT for harms)                                             | N/A |
| <b>Discussion</b>                                    |     |                                                                                                                                                   |     |
| Limitations                                          | 20  | Trial limitations, addressing sources of potential bias, imprecision, and, if relevant, multiplicity of analyses                                  | N/A |
| Generalisability                                     | 21  | Generalisability (external validity, applicability) of the trial findings                                                                         | N/A |
| Interpretation                                       | 22  | Interpretation consistent with results, balancing benefits and harms, and considering other relevant evidence                                     | N/A |
| <b>Other information</b>                             |     |                                                                                                                                                   |     |
| Registration                                         | 23  | Registration number and name of trial registry                                                                                                    | 3   |
| Protocol                                             | 24  | Where the full trial protocol can be accessed, if available                                                                                       | 3   |
| Funding                                              | 25  | Sources of funding and other support (such as supply of drugs), role of funders                                                                   | 11  |

\*We strongly recommend reading this statement in conjunction with the CONSORT 2010 Explanation and Elaboration for important clarifications on all the items. If relevant, we also recommend reading CONSORT extensions for cluster randomised trials, non-inferiority and equivalence trials, non-pharmacological treatments, herbal interventions, and pragmatic trials. Additional extensions are forthcoming: for those and for up to date references relevant to this checklist, see [www.consort-statement.org](http://www.consort-statement.org).



# BMJ Open

## Study Protocol for the G-SPIRIT trial: A Randomized, Placebo-Controlled, Double-blinded Phase 3 Trial of Granulocyte Colony Stimulating Factor-Mediated Neuroprotection for Acute Spinal Cord Injury

|                               |                                                                                                                                                                                                                                                                                                                                                                                                                                                                                                                                                                                                                                                                                                                                                                                                                                                                                                                                                                                                                                                                                                                                                                                                                                                                                                                                                                                                                                                                                                                                                                                                                                                                                                                                                                                                                                                                                                                                                                                                                                                                                                                                                                                                                                                                                                                                                                                                                                   |
|-------------------------------|-----------------------------------------------------------------------------------------------------------------------------------------------------------------------------------------------------------------------------------------------------------------------------------------------------------------------------------------------------------------------------------------------------------------------------------------------------------------------------------------------------------------------------------------------------------------------------------------------------------------------------------------------------------------------------------------------------------------------------------------------------------------------------------------------------------------------------------------------------------------------------------------------------------------------------------------------------------------------------------------------------------------------------------------------------------------------------------------------------------------------------------------------------------------------------------------------------------------------------------------------------------------------------------------------------------------------------------------------------------------------------------------------------------------------------------------------------------------------------------------------------------------------------------------------------------------------------------------------------------------------------------------------------------------------------------------------------------------------------------------------------------------------------------------------------------------------------------------------------------------------------------------------------------------------------------------------------------------------------------------------------------------------------------------------------------------------------------------------------------------------------------------------------------------------------------------------------------------------------------------------------------------------------------------------------------------------------------------------------------------------------------------------------------------------------------|
| Journal:                      | <i>BMJ Open</i>                                                                                                                                                                                                                                                                                                                                                                                                                                                                                                                                                                                                                                                                                                                                                                                                                                                                                                                                                                                                                                                                                                                                                                                                                                                                                                                                                                                                                                                                                                                                                                                                                                                                                                                                                                                                                                                                                                                                                                                                                                                                                                                                                                                                                                                                                                                                                                                                                   |
| Manuscript ID                 | bmjopen-2017-019083.R3                                                                                                                                                                                                                                                                                                                                                                                                                                                                                                                                                                                                                                                                                                                                                                                                                                                                                                                                                                                                                                                                                                                                                                                                                                                                                                                                                                                                                                                                                                                                                                                                                                                                                                                                                                                                                                                                                                                                                                                                                                                                                                                                                                                                                                                                                                                                                                                                            |
| Article Type:                 | Protocol                                                                                                                                                                                                                                                                                                                                                                                                                                                                                                                                                                                                                                                                                                                                                                                                                                                                                                                                                                                                                                                                                                                                                                                                                                                                                                                                                                                                                                                                                                                                                                                                                                                                                                                                                                                                                                                                                                                                                                                                                                                                                                                                                                                                                                                                                                                                                                                                                          |
| Date Submitted by the Author: | 15-Dec-2017                                                                                                                                                                                                                                                                                                                                                                                                                                                                                                                                                                                                                                                                                                                                                                                                                                                                                                                                                                                                                                                                                                                                                                                                                                                                                                                                                                                                                                                                                                                                                                                                                                                                                                                                                                                                                                                                                                                                                                                                                                                                                                                                                                                                                                                                                                                                                                                                                       |
| Complete List of Authors:     | <p>Koda, Masao; G-SPIRIT Study Group; University of Tsukuba, Department of Orthopedic Surgery<br/> Hanaoka, Hideki; G-SPIRIT Study Group; Chiba University Hospital, Clinical Research Center<br/> Sato, Takatoshi; G-SPIRIT Study Group; Chiba University Hospital, Clinical Research Center<br/> Fujii, Yasuhisa; G-SPIRIT Study Group; Chiba University Hospital, Clinical Research Center<br/> Hanawa, Michiko; G-SPIRIT Study Group; Chiba University Hospital, Clinical Research Center<br/> Takahashi, Sho; G-SPIRIT Study Group; Chiba University Hospital, Clinical Research Center<br/> Furuya, Takeo; G-SPIRIT Study Group; Graduate School of Medicine, Chiba University, Department of Orthopaedic Surgery<br/> Ijima, Yasushi; G-SPIRIT Study Group; Graduate School of Medicine, Chiba University, Department of Orthopaedic Surgery<br/> Saito, Junya; G-SPIRIT Study Group; Graduate School of Medicine, Chiba University, Department of Orthopaedic Surgery<br/> Kitamura, Mitsuhiro; G-SPIRIT Study Group; Graduate School of Medicine, Chiba University, Department of Orthopaedic Surgery<br/> Ohtori, Seiji; G-SPIRIT Study Group; Graduate School of Medicine, Chiba University, Department of Orthopaedic Surgery<br/> Matsumoto, Yukei; G-SPIRIT Study Group; University of Tsukuba, Department of Orthopedic Surgery<br/> Abe, Tetsuya; G-SPIRIT Study Group; University of Tsukuba, Department of Orthopedic Surgery<br/> Watanabe, Kei; G-SPIRIT Study Group; Niigata University Graduate School of Medicine and Dental Sciences, Department of Orthopedic Surgery<br/> Hirano, Toru; G-SPIRIT Study Group; Niigata University Graduate School of Medicine and Dental Sciences, Department of Orthopedic Surgery<br/> Ohashi, Masayuki; G-SPIRIT Study Group; Niigata University Graduate School of Medicine and Dental Sciences, Department of Orthopedic Surgery<br/> Shoji, Hirokazu; G-SPIRIT Study Group; Niigata University Graduate School of Medicine and Dental Sciences, Department of Orthopedic Surgery<br/> Mizouchi, Tatsuki; G-SPIRIT Study Group; Niigata University Graduate School of Medicine and Dental Sciences, Department of Orthopedic Surgery<br/> Takahashi, Ikuko; G-SPIRIT Study Group; Niigata University Graduate School of Medicine and Dental Sciences, Department of Orthopedic Surgery<br/> Kawahara, Norio; G-SPIRIT Study Group; Kanazawa Medical University,</p> |

|    |                                                                         |
|----|-------------------------------------------------------------------------|
| 1  |                                                                         |
| 2  |                                                                         |
| 3  |                                                                         |
| 4  | Orthopaedic Surgery                                                     |
| 5  | Kawaguchi, Masahito; G-SPIRIT Study Group; Kanazawa Medical             |
| 6  | University, Orthopaedic Surgery                                         |
| 7  | Orita, Yugo; G-SPIRIT Study Group; Kanazawa Medical University,         |
| 8  | Orthopaedic Surgery                                                     |
| 9  | Sasamoto, Takeshi; G-SPIRIT Study Group; Kanazawa Medical University,   |
| 10 | Orthopaedic Surgery                                                     |
| 11 | Yoshioka, Masahito; G-SPIRIT Study Group; Kanazawa Medical University,  |
| 12 | Orthopaedic Surgery                                                     |
| 13 | Fujii, Masafumi; G-SPIRIT Study Group; Kanazawa Medical University,     |
| 14 | Orthopaedic Surgery                                                     |
| 15 | Yonezawa, Katsutaka; G-SPIRIT Study Group; Kanazawa Medical             |
| 16 | University, Orthopaedic Surgery                                         |
| 17 | Soma, Daisuke; G-SPIRIT Study Group; Kanazawa Medical University,       |
| 18 | Orthopaedic Surgery                                                     |
| 19 | Taneichi, Hiroshi; G-SPIRIT Study Group; Dokkyo Ika Daigaku, Department |
| 20 | of Orthopedic Surgery                                                   |
| 21 | Takeuchi, Daisaku; G-SPIRIT Study Group; Dokkyo Ika Daigaku,            |
| 22 | Department of Orthopedic Surgery                                        |
| 23 | Inami, Satoshi; G-SPIRIT Study Group; Dokkyo Ika Daigaku, Department    |
| 24 | of Orthopedic Surgery                                                   |
| 25 | Moridaira, Hiroshi; G-SPIRIT Study Group; Dokkyo Ika Daigaku,           |
| 26 | Department of Orthopedic Surgery                                        |
| 27 | Ueda, Haruki; G-SPIRIT Study Group; Dokkyo Ika Daigaku, Department of   |
| 28 | Orthopedic Surgery                                                      |
| 29 | Asano, Futoshi; G-SPIRIT Study Group; Dokkyo Ika Daigaku, Department    |
| 30 | of Orthopedic Surgery                                                   |
| 31 | Shibao, Yosuke; G-SPIRIT Study Group; Dokkyo Ika Daigaku, Department    |
| 32 | of Orthopedic Surgery                                                   |
| 33 | Aita, Ikuo; G-SPIRIT Study Group; Tsukuba Medical Center Byoin,         |
| 34 | Department of Orthopedic Surgery                                        |
| 35 | Takeuchi, Yosuke; G-SPIRIT Study Group; Tsukuba Medical Center Byoin,   |
| 36 | Department of Orthopedic Surgery                                        |
| 37 | Mimura, Masaya; G-SPIRIT Study Group; Funabashi Shiritsu Iryo Center,   |
| 38 | Department of Orthopedic Surgery                                        |
| 39 | Shimbo, Jun; G-SPIRIT Study Group; Funabashi Shiritsu Iryo Center,      |
| 40 | Department of Orthopedic Surgery                                        |
| 41 | Someya, Yukio; G-SPIRIT Study Group; Funabashi Shiritsu Iryo Center,    |
| 42 | Department of Orthopedic Surgery                                        |
| 43 | Ikenoue, Sumio; G-SPIRIT Study Group; Funabashi Shiritsu Iryo Center,   |
| 44 | Department of Orthopedic Surgery                                        |
| 45 | Sameda, Hiroaki; G-SPIRIT Study Group; Funabashi Shiritsu Iryo Center,  |
| 46 | Department of Orthopedic Surgery                                        |
| 47 | Takase, Kan; G-SPIRIT Study Group; Funabashi Shiritsu Iryo Center,      |
| 48 | Department of Orthopedic Surgery                                        |
| 49 | Ikeda, Yoshikazu; G-SPIRIT Study Group; Chiba Rosai Byoin, Department   |
| 50 | of Orthopedic Surgery                                                   |
| 51 | Nakajima, Fumitake; G-SPIRIT Study Group; Chiba Rosai Byoin,            |
| 52 | Department of Orthopedic Surgery                                        |
| 53 | Hashimoto, Mitsuhiro; G-SPIRIT Study Group; Chiba Rosai Byoin,          |
| 54 | Department of Orthopedic Surgery                                        |
| 55 | Ozawa, Tomoyuki; G-SPIRIT Study Group; Chiba Rosai Byoin, Department    |
| 56 | of Orthopedic Surgery                                                   |
| 57 | Hasue, Fumio; G-SPIRIT Study Group; Kimitsu Chuo Byoin, Department of   |
| 58 | Orthopedic Surgery                                                      |
| 59 | Fujiyoshi, Takayuki; G-SPIRIT Study Group; Kimitsu Chuo Byoin,          |
| 60 | Department of Orthopedic Surgery                                        |
|    | Kamiya, Koshiro; G-SPIRIT Study Group; Kimitsu Chuo Byoin, Department   |
|    | of Orthopedic Surgery                                                   |
|    | Watanabe, Masahiko; G-SPIRIT Study Group; Tokai Daigaku Igakubu         |
|    | Seikei Gekagaku, Department of Orthopedic Surgery                       |

|    |                                                                          |
|----|--------------------------------------------------------------------------|
| 1  |                                                                          |
| 2  |                                                                          |
| 3  |                                                                          |
| 4  | Katoh, Hiroyuki; G-SPIRIT Study Group; Tokai Daigaku - Isehara Campus,   |
| 5  | Department of Orthopedic Surgery                                         |
| 6  | Matsuyama, Yukihiro; G-SPIRIT Study Group; Hamamatsu Ika Daigaku,        |
| 7  | Department of Orthopedic Surgery                                         |
| 8  | Yamato, Yu; G-SPIRIT Study Group; Hamamatsu Ika Daigaku, Department      |
| 9  | of Orthopedic Surgery                                                    |
| 10 | Togawa, Daisuke; G-SPIRIT Study Group; Hamamatsu Ika Daigaku,            |
| 11 | Department of Orthopedic Surgery                                         |
| 12 | Hasegawa, Tomohiko; G-SPIRIT Study Group; Hamamatsu Ika Daigaku,         |
| 13 | Department of Orthopedic Surgery                                         |
| 14 | Kobayashi, Sho; G-SPIRIT Study Group; Hamamatsu Ika Daigaku,             |
| 15 | Department of Orthopedic Surgery                                         |
| 16 | Yoshida, Go; G-SPIRIT Study Group; Hamamatsu Ika Daigaku, Department     |
| 17 | of Orthopedic Surgery                                                    |
| 18 | Oe, Shin; G-SPIRIT Study Group; Hamamatsu Ika Daigaku, Department of     |
| 19 | Orthopedic Surgery                                                       |
| 20 | Banno, Tomohiro; G-SPIRIT Study Group; Hamamatsu Ika Daigaku,            |
| 21 | Department of Orthopedic Surgery                                         |
| 22 | Arima, Hideyuki; G-SPIRIT Study Group; Hamamatsu Ika Daigaku,            |
| 23 | Department of Orthopedic Surgery                                         |
| 24 | Akeda, Koji; G-SPIRIT Study Group; Mie Daigaku Daigakuin Igakukei        |
| 25 | Kenkyuka Igakubu, Department of Orthopedic Surgery                       |
| 26 | Kawamoto, Eiji; G-SPIRIT Study Group; Mie Daigaku Daigakuin Igakukei     |
| 27 | Kenkyuka Igakubu, Department of Orthopedic Surgery                       |
| 28 | Imai, Hiroshi; G-SPIRIT Study Group; Mie Daigaku Daigakuin Igakukei      |
| 29 | Kenkyuka Igakubu, Department of Orthopedic Surgery                       |
| 30 | Sakakibara, Toshihiko; G-SPIRIT Study Group; Mie Daigaku Daigakuin       |
| 31 | Igakukei Kenkyuka Igakubu, Department of Orthopedic Surgery              |
| 32 | Sudo, Akihiro ; G-SPIRIT Study Group; Mie Daigaku Daigakuin Igakukei     |
| 33 | Kenkyuka Igakubu, Department of Orthopedic Surgery                       |
| 34 | Ito, Yasuo; G-SPIRIT Study Group; Kobe Sekijuji Byoin, Department of     |
| 35 | Orthopedic Surgery                                                       |
| 36 | Kikuchi, Tsuyoshi; G-SPIRIT Study Group; Kobe Sekijuji Byoin, Department |
| 37 | of Orthopedic Surgery                                                    |
| 38 | Osaki, Shuhei; G-SPIRIT Study Group; Kobe Sekijuji Byoin, Department of  |
| 39 | Orthopedic Surgery                                                       |
| 40 | Tanaka, Nobuhiro; G-SPIRIT Study Group; Hiroshima Daigaku Igakubu        |
| 41 | Daigakuin Ishiyaku Hokengaku Kenkyuka, Department of Orthopedic          |
| 42 | Surgery                                                                  |
| 43 | Nakanishi, Kazuyoshi; G-SPIRIT Study Group; Hiroshima Daigaku Igakubu    |
| 44 | Daigakuin Ishiyaku Hokengaku Kenkyuka, Department of Orthopedic          |
| 45 | Surgery                                                                  |
| 46 | Kamei, Naosuke; G-SPIRIT Study Group; Hiroshima Daigaku Igakubu          |
| 47 | Daigakuin Ishiyaku Hokengaku Kenkyuka, Department of Orthopedic          |
| 48 | Surgery                                                                  |
| 49 | Kotaka, Shinji; G-SPIRIT Study Group; Hiroshima Daigaku Igakubu          |
| 50 | Daigakuin Ishiyaku Hokengaku Kenkyuka, Department of Orthopedic          |
| 51 | Surgery                                                                  |
| 52 | Baba, Hideo; G-SPIRIT Study Group; Nagasaki Rosai Byoin, Department of   |
| 53 | Orthopedic Surgery                                                       |
| 54 | Okudaira, Tsuyoshi; G-SPIRIT Study Group; Nagasaki Rosai Byoin,          |
| 55 | Department of Orthopedic Surgery                                         |
| 56 | Hiroaki, Konishi; G-SPIRIT Study Group; Nagasaki Rosai Byoin,            |
| 57 | Department of Orthopedic Surgery                                         |
| 58 | Yamaguchi, Takayuki; G-SPIRIT Study Group; Nagasaki Rosai Byoin,         |
| 59 | Department of Orthopedic Surgery                                         |
| 60 | Ito, Keigo; G-SPIRIT Study Group; Chubu Rosai Byoin, Department of       |
|    | Orthopedic Surgery                                                       |
|    | Katayama, Yoshito; G-SPIRIT Study Group; Chubu Rosai Byoin,              |
|    | Department of Orthopedic Surgery                                         |
|    | Matsumoto, Taro; G-SPIRIT Study Group; Chubu Rosai Byoin, Department     |

|                                 |                                                                                                                                                                                                                                                                                                                                                                                                                                                                                                                                                                                                                                                                                                                                                                                                                                                                                                                                                                                                                                                                                                                                                                                                                                                                                                                                                                                                                                                                                                                                                                                                                                                                                                                                                                                                                                                                                                                                                                                                                                                                                                                                                                                                                                                                                                                                                                                                               |
|---------------------------------|---------------------------------------------------------------------------------------------------------------------------------------------------------------------------------------------------------------------------------------------------------------------------------------------------------------------------------------------------------------------------------------------------------------------------------------------------------------------------------------------------------------------------------------------------------------------------------------------------------------------------------------------------------------------------------------------------------------------------------------------------------------------------------------------------------------------------------------------------------------------------------------------------------------------------------------------------------------------------------------------------------------------------------------------------------------------------------------------------------------------------------------------------------------------------------------------------------------------------------------------------------------------------------------------------------------------------------------------------------------------------------------------------------------------------------------------------------------------------------------------------------------------------------------------------------------------------------------------------------------------------------------------------------------------------------------------------------------------------------------------------------------------------------------------------------------------------------------------------------------------------------------------------------------------------------------------------------------------------------------------------------------------------------------------------------------------------------------------------------------------------------------------------------------------------------------------------------------------------------------------------------------------------------------------------------------------------------------------------------------------------------------------------------------|
|                                 | <p>of Orthopedic Surgery<br/>         Matsumoto, Tomohiro; G-SPIRIT Study Group; Chubu Rosai Byoin, Department of Orthopedic Surgery<br/>         Idota, Masaru; G-SPIRIT Study Group; Chubu Rosai Byoin, Department of Orthopedic Surgery<br/>         Kanno, Haruo; G-SPIRIT Study Group; Tohoku University School of Medicine, Department of Orthopedic Surgery<br/>         Aizawa, Toshimi; G-SPIRIT Study Group; Tohoku University School of Medicine, Department of Orthopedic Surgery<br/>         Hashimoto, Ko; G-SPIRIT Study Group; Tohoku University School of Medicine, Department of Orthopedic Surgery<br/>         Eto, Toshimitsu; G-SPIRIT Study Group; Tohoku University School of Medicine, Department of Orthopedic Surgery<br/>         Sugaya, Takehiro; G-SPIRIT Study Group; Tohoku University School of Medicine, Department of Orthopedic Surgery<br/>         Matsuda, Michiharu; G-SPIRIT Study Group; Tohoku University School of Medicine, Department of Orthopedic Surgery<br/>         Fushimi, Kazunari; G-SPIRIT Study Group; Gifu Daigaku Igakubu Daigakuin Igaku Kenkyuka Seikei Gekagaku, Department of Orthopedic Surgery<br/>         Nozawa, Satoshi; G-SPIRIT Study Group; Gifu Daigaku Igakubu Daigakuin Igaku Kenkyuka Seikei Gekagaku, Department of Orthopedic Surgery<br/>         Iwai, Chizuo; G-SPIRIT Study Group; Gifu Daigaku Igakubu Daigakuin Igaku Kenkyuka Seikei Gekagaku, Department of Orthopedic Surgery<br/>         Taguchi, Toshihiko; G-SPIRIT Study Group; Yamaguchi Daigaku Igakubu Daigakuin Igakukei Kenkyuka Seikei Gekagaku, Department of Orthopedic Surgery<br/>         Kanchiku, Tsukasa; G-SPIRIT Study Group; Yamaguchi Daigaku Igakubu Daigakuin Igakukei Kenkyuka Seikei Gekagaku, Department of Orthopedic Surgery<br/>         Suzuki, Hidenori; G-SPIRIT Study Group; Yamaguchi Daigaku Igakubu Daigakuin Igakukei Kenkyuka Seikei Gekagaku, Department of Orthopedic Surgery<br/>         Nishida, Norihiro; G-SPIRIT Study Group; Yamaguchi Daigaku Igakubu Daigakuin Igakukei Kenkyuka Seikei Gekagaku, Department of Orthopedic Surgery<br/>         Funaba, Masahiro; G-SPIRIT Study Group; Yamaguchi Daigaku Igakubu Daigakuin Igakukei Kenkyuka Seikei Gekagaku, Department of Orthopedic Surgery<br/>         Yamazaki, Masashi; G-SPIRIT Study Group; University of Tsukuba, Department of Orthopedic Surgery</p> |
| <b>Primary Subject Heading</b>: | Neurology                                                                                                                                                                                                                                                                                                                                                                                                                                                                                                                                                                                                                                                                                                                                                                                                                                                                                                                                                                                                                                                                                                                                                                                                                                                                                                                                                                                                                                                                                                                                                                                                                                                                                                                                                                                                                                                                                                                                                                                                                                                                                                                                                                                                                                                                                                                                                                                                     |
| Secondary Subject Heading:      | Medical management                                                                                                                                                                                                                                                                                                                                                                                                                                                                                                                                                                                                                                                                                                                                                                                                                                                                                                                                                                                                                                                                                                                                                                                                                                                                                                                                                                                                                                                                                                                                                                                                                                                                                                                                                                                                                                                                                                                                                                                                                                                                                                                                                                                                                                                                                                                                                                                            |
| Keywords:                       | Neurological injury < NEUROLOGY, Spine < ORTHOPAEDIC & TRAUMA SURGERY, Clinical trials < THERAPEUTICS                                                                                                                                                                                                                                                                                                                                                                                                                                                                                                                                                                                                                                                                                                                                                                                                                                                                                                                                                                                                                                                                                                                                                                                                                                                                                                                                                                                                                                                                                                                                                                                                                                                                                                                                                                                                                                                                                                                                                                                                                                                                                                                                                                                                                                                                                                         |
|                                 |                                                                                                                                                                                                                                                                                                                                                                                                                                                                                                                                                                                                                                                                                                                                                                                                                                                                                                                                                                                                                                                                                                                                                                                                                                                                                                                                                                                                                                                                                                                                                                                                                                                                                                                                                                                                                                                                                                                                                                                                                                                                                                                                                                                                                                                                                                                                                                                                               |

SCHOLARONE™  
 Manuscripts

1  
2  
3  
4  
5  
6  
7  
8  
9

## Study Protocol for the G-SPIRIT trial: A Randomized, Placebo-Controlled, Double-blinded Phase 3 Trial of Granulocyte Colony Stimulating Factor-Mediated Neuroprotection for Acute Spinal Cord Injury

10  
11  
12  
13  
14  
15  
16

Corresponding Author: Masao Koda

1-1-1 Tennodai, Tsukuba City, Ibaraki 3058575, Japan

e-mail: [masaokod@gmail.com](mailto:masaokod@gmail.com), tel: 81-29-853-3219

17  
18  
19  
20  
21  
22  
23  
24  
25  
26  
27  
28  
29  
30  
31  
32  
33  
34  
35  
36  
37  
38  
39  
40  
41  
42  
43  
44  
45  
46  
47  
48  
49  
50  
51  
52  
53  
54  
55  
56  
57  
58  
59  
60

Authors: Masao Koda<sup>1,2</sup>, Hideki Hanaoka<sup>1,3</sup>, Takatoshi Sato<sup>1,3</sup>, Yasuhisa Fujii<sup>1,3</sup>, Michiko Hanawa<sup>1,3</sup>, Sho Takahashi<sup>1,3</sup>, Takeo Furuya<sup>1,4</sup>, Yasushi Ijima<sup>1,4</sup>, Junya Saito<sup>1,4</sup>, Mitsuhiro Kitamura<sup>1,4</sup>, Seiji Ohtori<sup>1,4</sup>, Yukei Matsumoto<sup>1,2</sup>, Tetsuya Abe<sup>1,2</sup>, Kei Watanabe<sup>1,5</sup>, Toru Hirano<sup>1,5</sup>, Masayuki Ohashi<sup>1,5</sup>, Hirokazu Shoji<sup>1,5</sup>, Tatsuki Mizouchi<sup>1,5</sup>, Ikuko Takahashi<sup>1,5</sup>, Norio Kawahara<sup>1,6</sup>, Masahito Kawaguchi<sup>1,6</sup>, Yugo Orita<sup>1,6</sup>, Takeshi Sasamoto<sup>1,6</sup>, Masahito Yoshioka<sup>1,6</sup>, Masafumi Fujii<sup>1,6</sup>, Katsutaka Yonezawa<sup>1,6</sup>, Daisuke Soma<sup>1,6</sup>, Hiroshi Taneichi<sup>1,7</sup>, Daisaku Takeuchi<sup>1,7</sup>, Satoshi Inami<sup>1,7</sup>, Hiroshi Moridaira<sup>1,7</sup>, Haruki Ueda<sup>1,7</sup>, Futoshi Asano<sup>1,7</sup>, Yosuke Shibao<sup>1,7</sup>, Ikuo Aita<sup>1,8</sup>, Yosuke Takeuchi<sup>1,8</sup>, Masaya Mimura<sup>1,9</sup>, Jun Shimbo<sup>1,9</sup>, Yukio Someya<sup>1,9</sup>, Sumio Ikenoue<sup>1,9</sup>, Hiroaki Sameda<sup>1,9</sup>, Kan Takase<sup>1,9</sup>, Yoshikazu Ikeda<sup>1,10</sup>, Fumitake Nakajima<sup>1,10</sup>, Mitsuhiro Hashimoto<sup>1,10</sup>, Tomoyuki Ozawa<sup>1,10</sup>, Fumio Hasue<sup>1,11</sup>, Takayuki Fujiyoshi<sup>1,11</sup>, Koshiro Kamiya<sup>1,11</sup>, Masahiko Watanabe<sup>1,12</sup>, Hiroyuki Katoh<sup>1,12</sup>, Yukihiro Matsuyama<sup>1,13</sup>, Yu Yamamoto<sup>1,13</sup>, Daisuke Togawa<sup>1,13</sup>, Tomohiko Hasegawa<sup>1,13</sup>, Sho Kobayashi<sup>1,13</sup>, Go Yoshida<sup>1,13</sup>, Shin Oe<sup>1,13</sup>, Tomohiro Banno<sup>1,13</sup>, Hideyuki Arima<sup>1,13</sup>, Koji Akeda<sup>1,14</sup>, Eiji Kawamoto<sup>1,14</sup>, Hiroshi Imai<sup>1,14</sup>, Toshihiko Sakakibara<sup>1,14</sup>, Akihiro Sudo<sup>1,14</sup>, Yasuo Ito<sup>1,15</sup>, Tsuyoshi Kikuchi<sup>1,15</sup>, Shuheii Osaki<sup>1,15</sup>, Nobuhiro Tanaka<sup>1,16</sup>, Kazuyoshi Nakanishi<sup>1,16</sup>, Naosuke Kamei<sup>1,16</sup>, Shinji Kotaka<sup>1,16</sup>, Hideo Baba<sup>1,17</sup>, Tsuyoshi Okudaira<sup>1,17</sup>, Hiroaki Konishi<sup>1,17</sup>, Takayuki Yamaguchi<sup>1,17</sup>, Keigo Ito<sup>1,18</sup>, Yoshito Katayama<sup>1,18</sup>, Taro Matsumoto<sup>1,18</sup>, Tomohiro Matsumoto<sup>1,18</sup>, Masaru Idota<sup>1,18</sup>, Haruo Kanno<sup>1,19</sup>, Toshimi Aizawa<sup>1,19</sup>, Ko Hashimoto<sup>1,19</sup>, Toshimitsu Eto<sup>1,19</sup>, Takehiro Sugaya<sup>1,19</sup>, Michiharu Matsuda<sup>1,19</sup>, Kazunari Fushimi<sup>1,20</sup>, Satoshi Nozawa<sup>1,20</sup>, Chizuo Iwai<sup>1,20</sup>, Toshihiko Taguchi<sup>1,21</sup>, Tsukasa Kanchiku<sup>1,21</sup>, Hidenori Suzuki<sup>1,21</sup>, Norihiro Nishida<sup>1,21</sup>, Masahiro Funaba<sup>1,21</sup>, Masashi Yamazaki<sup>1,2</sup>

1  
2  
3  
4  
5  
6 Affiliations

7 <sup>1</sup>G-SPIRIT Study Group is consisted by Nineteen major hospitals in Japan constituting the  
8 G-SPIRIT study group  
9

10 <sup>2</sup>Department of Orthopedic Surgery, University of Tsukuba, Ibaraki

11 <sup>3</sup>Clinical Research Center, Chiba University Hospital, Chiba

12 <sup>4</sup>Department of Orthopedic Surgery, Chiba University Graduate School of Medicine, Chiba

13 <sup>5</sup>Department of Orthopedic Surgery, Niigata University Graduate School of Medicine and  
14 Dental Sciences, Niigata  
15

16 <sup>6</sup>Department of Orthopedic Surgery, Kanazawa Medical University, Ishikawa

17 <sup>7</sup>Department of Orthopedic Surgery, Dokkyo Medical University, Tochigi

18 <sup>8</sup>Department of Orthopedic Surgery, Tsukuba Medical Center, Ibaraki

19 <sup>9</sup>Department of Orthopedic Surgery, Funabashi Municipal Medical Center, Chiba

20 <sup>10</sup>Department of Orthopedic Surgery, Chiba Rosai Hospital, Chiba

21 <sup>11</sup>Department of Orthopedic Surgery, Kimitsu Chuo Hospital, Chiba

22 <sup>12</sup>Department of Orthopedic Surgery, Tokai University School of Medicine, Kanagawa

23 <sup>13</sup>Department of Orthopedic Surgery, Hamamatsu University School of Medicine, Shizuoka

24 <sup>14</sup>Department of Orthopedic Surgery, Graduate School of Medicine, Mie University, Mie

25 <sup>15</sup>Department of Orthopedic Surgery, Kobe Red Cross Hospital, Hyogo

26 <sup>16</sup>Department of Orthopedic Surgery, Graduate School of Biomedical Sciences, Hiroshima  
27 University, Hiroshima

28 <sup>17</sup>Department of Orthopedic Surgery, Nagasaki Rosai Hospital, Nagasaki

29 <sup>18</sup>Department of Orthopedic Surgery, Chubu Rosai Hospital, Aichi

30 <sup>19</sup>Department of Orthopedic Surgery, Tohoku University School of Medicine, Miyagi

31 <sup>20</sup>Department of Orthopedic Surgery, Gifu University School of Medicine, Gifu

32 <sup>21</sup>Department of Orthopedic Surgery, Yamaguchi University Graduate School of Medicine,  
33 Yamaguchi  
34

35  
36  
37  
38  
39  
40  
41  
42  
43  
44  
45  
46  
47  
48  
49  
50  
51  
52 Word Count: 2516  
53  
54  
55  
56  
57

## Abstract

**Introduction:** Granulocyte Colony Stimulating Factor (G-CSF) is generally used for neutropenia. Previous experimental studies revealed that G-CSF promoted neurological recovery after spinal cord injury (SCI). Next we moved to early phase of clinical trials. In a phase 1/2a trial, no adverse events were observed. Next, we conducted a non-randomized, non-blinded, comparative trial, which suggested the efficacy of G-CSF for promoting neurological recovery. Based on those results, we are now performing a phase 3 trial.

**Methods and Analysis:** The objective of this study is to evaluate the efficacy of G-CSF for acute SCI. The study design is a prospective, multicenter, randomized, double-blinded, placebo-controlled comparative study. The current trial includes cervical SCI (severity of American Spinal Injury Association (ASIA) Impairment Scale B/C) within 48 hours after injury. Patients are randomly assigned to G-CSF and placebo groups. The G-CSF group is administered 400  $\mu\text{g}/\text{m}^2/\text{d}\times 5\text{d}$  of G-CSF in normal saline via intravenous infusion for 5 consecutive days. The placebo group is similarly administered a placebo. Our primary endpoint is changes in ASIA motor scores from baseline to 3 months. Each group includes 44 patients (88 total patients). This trial is funded by the Center for Clinical Trials, Japan Medical Association.

**Ethics and Dissemination:** The study was approved by the Institutional Review Board of each institution and will be conducted according to the principles of the World Medical Association Declaration of Helsinki and in accordance with the Japanese Medical Research Involving Human Subjects Act and other guidelines, regulations and Acts. Results of the clinical study will be submitted to the head of the respective clinical study site as a report after conclusion of the clinical study by the sponsor-investigator. Even if the results are not favorable despite conducting the clinical study properly, the data will be published as a paper.

**Registration:** UMIN000018752

<https://upload.umin.ac.jp/cgi-open-bin/ctr/ctr.cgi?function=brows&action=brows&type=summary&recptno=R000021694&language=J>

Protocol version: Ver. 5.0 (2016/10/20)

## Strengths and Limitations of This Study

### *Strengths*

- ✓ Novel drug therapy for acute spinal cord injury is much-needed.
- ✓ Randomized, placebo-controlled, double-blinded design can eliminate bias.

### *Limitations*

- ✓ Acute spinal cord injury patients are difficult to recruit to the trial.
- ✓ Patient's neurological status in acute phase is unstable, possibly resulting in dispersion of the patient's background.

- 1  
2  
3  
4  
5 ✓ Concealment must be performed very strictly because G-CSF apparently increases  
6 white blood cell count.  
7  
8

## 9 **Introduction**

10 Spinal cord injury (SCI) is a devastating injury by which the patient can suffer from  
11 long-lasting severe sequelae including palsy of extremities, sensory disturbance,  
12 bowel/bladder/sexual dysfunction, and neuropathic pain. Conceptually, SCI is divided into  
13 two chronological phases: a primary and a secondary phase. Primary injury is mechanical  
14 damage to spinal cord tissue itself caused by fracture and/or dislocation or compression.  
15 Secondary injury is triggered by the primary injury and is a biological reaction of the spinal  
16 cord, which includes ischemia, hemorrhage, excitotoxicity, hyperpermeability, and  
17 inflammation<sup>1</sup>. Because secondary injury can be the main target of treatment, extensive  
18 laboratory and clinical investigation of neuroprotection is needed to manage secondary  
19 injury<sup>2</sup>.  
20  
21  
22  
23  
24  
25  
26  
27

28 To date, the only approved neuroprotective therapy for SCI is massive  
29 methylprednisolone sodium succinate (MPSS) therapy based on the NASCIS 2 study<sup>3</sup>.  
30 However, recent reports revealed that MPSS shows only a modest effect for SCI. In  
31 addition, several reports have described adverse events induced by MPSS for SCI including  
32 infections (pneumonia, urinary tract infection) and gastrointestinal disorders (gastric ulcer,  
33 etc.)<sup>4</sup>. Therefore, the use of MPSS for SCI has become controversial<sup>5</sup>. Accordingly, a new  
34 therapeutic drug for SCI is desirable.  
35  
36  
37  
38  
39

40 Granulocyte colony-stimulating factor (G-CSF, generic name: filgrastim) is a growth  
41 factor that affects the hematopoietic system, promoting differentiation, proliferation, and  
42 survival of granulocytes<sup>6</sup>. Clinically, in Japan, G-CSF is administered to patients with  
43 leukopenia, and to peripheral stem cell transplantation donors, G-CSF is administered to  
44 mobilize hematopoietic stem cells into the peripheral blood<sup>7</sup>. In the central nervous system,  
45 G-CSF has properties to mobilize the movement of bone marrow cells into the brain<sup>8</sup> and  
46 spine, and in a stroke model, has shown neuroprotective properties<sup>9</sup>. In other countries,  
47 clinical studies of the effects of G-CSF in cerebral infarction have been reported<sup>10</sup>.  
48  
49  
50  
51  
52  
53

54 To prove the hypothesis that G-CSF has neuroprotective properties against SCI, G-CSF  
55  
56  
57



1  
2  
3  
4  
5 was administered to rat and mouse animal models of spinal cord injury, and hind limb  
6 function improved significantly after administration of G-CSF. Further investigations into  
7 the mechanism of action of G-CSF in SCI were conducted. Data obtained to date identify  
8 the following properties of G-CSF: [1] mobilization of bone marrow-derived stem cells  
9 causing their biointegration at the site of SCI<sup>11</sup>, [2] direct inhibition of nerve cell death<sup>12</sup>,  
10 [3] protection of the myelin sheath by inhibiting oligodendrocyte cell death<sup>13</sup>, [4] inhibition  
11 of inflammatory cytokine expression (TNF- $\alpha$ , IL-1 $\beta$ )<sup>13</sup>, and [5] promotion of  
12 neovascularization<sup>14</sup>. These properties suggest that G-CSF has a neuroprotective effect in  
13 acute SCI.  
14  
15  
16  
17  
18  
19  
20

21 Based on these properties, a phase 1/2a clinical study was conducted where the main  
22 objective was to confirm the safety and feasibility of G-CSF for treatment of patients with  
23 acute SCI<sup>15</sup>. This study was an open-label, dose-titrating study with no control group. As  
24 the initial step, 5 patients were given 5  $\mu\text{g}/\text{kg}/\text{day}$  of G-CSF for 5 consecutive days by i.v.  
25 infusion, and as the second step, 11 patients were given 10  $\mu\text{g}/\text{kg}/\text{day}$  of G-CSF for 5  
26 consecutive days by i.v. infusion. No serious adverse events were noted, and the safety of  
27 G-CSF administration in patients with acute SCI was confirmed<sup>15</sup>.  
28  
29  
30  
31  
32

33 As a next step, to validate the efficacy of G-CSF in neuroprotective treatment, a  
34 multicenter, prospective, nonrandomized, nonblinded, comparative control study (phase 2b  
35 clinical trial) was conducted<sup>16</sup>. Based on the results of the previous phase 1/2a clinical trial,  
36 the dosage and duration of treatment with G-CSF in this study was 10  $\mu\text{g}/\text{kg}/\text{day}$  for 5  
37 consecutive days. Patients with acute cervical SCI (within 48 h of injury) were registered in  
38 the clinical trial and allocated to either the G-CSF group (G-CSF 10  $\mu\text{g}/\text{kg}/\text{day} \times 5$  days i.v.  
39 infusion) or control group (no G-CSF administration) at each treatment facility. A total of  
40 19 patients in the G-CSF group and 26 patients in the control group were observed for 3  
41 months or longer. American Spinal Injury Association (ASIA) motor score (motor: 0 to 100  
42 points) was compared between the groups. ASIA motor scores were  $26.1 \pm 18.9$  in the  
43 G-CSF group and  $12.2 \pm 14.7$  in the control group showing a significant improvement of  
44 motor paralysis in the G-CSF group ( $p < 0.01$ ). In addition, in cases that could be followed  
45 for 1 year or longer, a significant improvement of ASIA motor score was observed in the  
46  
47  
48  
49  
50  
51  
52  
53  
54  
55  
56  
57  
58  
59  
60

1  
2  
3  
4  
5 G-CSF group<sup>16</sup>.  
6

7 Based on results of these preclinical and early phase clinical trials, we are now  
8 conducting a phase 3 trial.  
9

### 10 11 12 *Specific Objective* 13

14 The objective of this study is to evaluate the efficacy of G-CSF for improving motor  
15 paralysis in acute SCI.  
16

### 17 18 19 **Methods and Analysis** 20

#### 21 *Design of the study* 22

23 The study design of the current trial is a prospective, multicenter, randomized,  
24 double-blinded, placebo-controlled comparative study.  
25  
26

#### 27 28 *Study Procedures* 29

30 The study outline is shown in Figure. Patients will be randomly assigned to G-CSF and  
31 placebo groups. A central registration system will be used for dynamic randomization into  
32 the investigational treatment group (G-CSF) and control group (placebo) based on age at  
33 registration (16–64 years of age, or 65–84 years of age) and severity of paralysis (AIS B or  
34 C) at 48 h after injury. With or without the surgical stabilization and/or decompression was  
35 not included in stratification. Initially, screened patients with severity AIS B/C will be  
36 tentatively enrolled. Initial screening of the patients include clinical laboratory test, imaging  
37 studies including X-ray, magnetic resonance imaging and computed tomography, and  
38 neurological/functional evaluations.  
39

40 Neurological re-assessment will be performed 48±4 hours after SCI and the patients  
41 who will recover to severity AIS D will be excluded. The patients with severity AIS B/C at  
42 neurological re-assessment 48±4 hours after SCI will be enrolled and randomly allocated to  
43 either the investigational treatment group (G-CSF) or control group (placebo) in a 1 to 1  
44 ratio. The subject registration center uses a program based on an appropriate computer  
45 algorithm to allocate patients into groups. The first dose of investigative drugs will be  
46  
47  
48  
49  
50  
51  
52  
53  
54  
55  
56  
57

1  
2  
3  
4  
5 administered to the patients after re-assessment of neurological status and enrollment 48±4  
6 hours after SCI.  
7

8  
9 The G-CSF group will be administered 400 µg/m<sup>2</sup>/d × 5d of G-CSF in normal saline via  
10 intravenous infusion for 5 consecutive days. The placebo group will be similarly  
11 administered a placebo. The first dose of investigative drugs will be administered to the  
12 patients 48±4 hours after SCI. The dosing schedule will be once a day in every morning  
13 (9-10 AM) for consecutive 5 days even in case that the first dosing was performed at night  
14 because of restriction on practices. Investigational drugs including both G-CSF and placebo  
15 will be stored in refrigerator which will be kept between 1- 6°C and has temperature-logger  
16 in pharmacies in each participating institutes. The investigational drugs is packaged in  
17 ampule with label only printed as serial numbers, ten ampule is packed in one box with label  
18 only printed serial numbers. Web-based allocation system will show the serial number of  
19 investigational drug which must be used to respective patients to ensure blinding.  
20  
21  
22  
23  
24  
25  
26  
27

28 We decided dosage of drug based on our previous non-randomized early phase clinical  
29 studies. On phase 1/2a clinical study, of which study design was open-label, dose-titrating  
30 study with no control group, SCI patients who were administered 10µg/kg/day G-CSF for 5  
31 days showed marked elevation of white blood cell number (reached nearly 50000/µl, of  
32 which WBC number might cause adverse effects of G-CSF) during G-CSF administration<sup>15</sup>.  
33 Therefore we decided to withdraw additional titration. In addition, next phase of clinical  
34 study, of which design was multicenter, prospective, nonrandomized, nonblinded,  
35 comparative control study, showed suggestive efficacy of G-CSF (10 µg/kg/d for 5 days)  
36 for acute SCI<sup>16</sup>. Based on those results, we finally decided the dosage of G-CSF as 10  
37 µg/kg/d × 5d for 5 days. In the current clinical trial, the dosage of G-CSF is written as 400  
38 µg/m<sup>2</sup>/d (= 10 µg/kg/d) according to the Japanese Pharmaceutical and Medical Device  
39 Agency (PMDA)'s instruction for consolidation with product labeling.  
40  
41  
42  
43  
44  
45  
46  
47  
48

49 We decided to 48hours after SCI as the therapeutic time window because our previous  
50 multicenter, prospective, nonrandomized, nonblinded, comparative control study, which  
51 recruited SCI patients within 48 hours after injury, showed that there was no significant  
52 difference in neurological outcome between the patient administered G-CSF very early  
53  
54  
55  
56  
57

1  
2  
3  
4  
5 after the injury and 48 hours after injury<sup>16</sup>.  
6

7 Allocation will be concealed between blinded evaluators of efficacy/safety and those  
8 for laboratory data, as G-CSF markedly increases white blood cell counts that can reveal  
9 patient treatment.  
10

11  
12 Our primary endpoint is changes in ASIA motor scores (international standards for  
13 neurological classification of spinal cord injury (ISNSCI)<sup>17</sup> suppl. Figure 1) from baseline  
14 to 3 months calculated as follows: 3-month ASIA motor score change = 3-month ASIA  
15 motor score – pretreatment ASIA motor score. To maintain consistency of neurological  
16 assessment among the each evaluators, attending lecture and e-learning (in website of  
17 International Spinal Cord Society: <http://www.elearnsoci.org/>) of ASIA/ISNSCI scoring  
18 system is mandatory for every investigators participating to the present trial.  
19  
20

21  
22 Secondary endpoints are as follows. [1] Change in ASIA motor scores<sup>17</sup> at 6 months  
23 and 12 months after G-CSF administration compared with pretreatment. [2] Changes in  
24 sensory paralysis over time: change in ASIA sensory scores at 3 months, 6 months, and 12  
25 months after G-CSF administration compared with pretreatment. [3] Severity of functional  
26 compromise because of paralysis: AIS before administration and at 3, 6, and 12 months  
27 after administration of G-CSF. [4] Percentage of responders: percentage of patients whose  
28 AIS improved by 1 grade or more at 3, 6, and 12 months after administration compared  
29 with before administration of G-CSF. [5] Neurological level of injury (NLI): percentage of  
30 patients whose NLI decreased by 1 grade or more at 3, 6, or 12 months after administration  
31 of G-CSF compared with pretreatment. [6] SCIM<sup>18</sup>: change in SCIM scores at 3, 6, and 12  
32 months after G-CSF administration compared with pretreatment [7] EQ-5D<sup>19</sup>: measured  
33 EQ-5D efficacy scores at 3, 6, and 12 months after G-CSF.  
34  
35

36  
37 To strengthen the analysis, more strict blindness of assessment by the evaluator for  
38 outcome measures is ideal. Therefore every prior score/measurement should be blinded  
39 and/or not the same person should assess every midpoint motor/sensory functional  
40 measurement. However, PMDA instructed us to assess one patients' functional evaluation  
41 by one evaluator for consistent assessment in respective patients. PMDA considers the  
42 consistency of assessment in respective patients is more important.  
43  
44  
45  
46  
47  
48  
49  
50  
51  
52  
53  
54  
55  
56  
57  
58  
59  
60

1  
2  
3  
4  
5  
6 The precise explanation of abovementioned outcome measures is as followings (suppl.  
7 Figures). ASIA motor score is determined by examining a function of 10 key muscles with  
8 manual muscle testing (MMT) in the supine position<sup>17</sup>. The score ranges from 0 to 25 for  
9 each extremity (MMT 0-5 in 5 muscles in each extremity), totaling 0 to 50 for the upper  
10 limbs and 0 to 50 for the lower limbs, resulting in total of ASIA motor score ranges from 0  
11 to 100. ASIA motor score shows the degree of motor impairment induced by SCI (suppl.  
12 Figure 1)<sup>17</sup>. ASIA sensory scores is determined by sensory testing of a key point in each of  
13 the 28 dermatomes (from C2 to S4-5) on the each sides of the body. Two aspects of  
14 sensation are examined, light touch and pin prick, at all the key points. Light touch and pin  
15 prick sensation is separately scored on a three-point scale, 0 = absent, 1= altered,  
16 2 = normal or intact. As a result, ASIA sensory scores range from 0 to 112 (suppl. Figure 1)  
17 in light touch and pin prick respectively<sup>17</sup>. AIS is used for gross grading of impairment:  
18 A = Complete. No sensory or motor function is preserved in the sacral segments S4-S5.  
19 B = Sensory incomplete. Sensory but not motor function is preserved below the  
20 neurological level. C = Motor incomplete. Motor function is preserved below the  
21 neurological level, and more than half of key muscle functions below the single  
22 neurological level of injury have a muscle grade less than 3 (Grades 0–2). D = Motor  
23 incomplete. Motor function is preserved below the neurological level, and at least half (half  
24 or more) of key muscle functions below the neurological level have a muscle grade >3.  
25 E = Normal<sup>17</sup>. If sensation and motor function as tested are graded as normal in all  
26 segments, and the patient had prior deficits, then the AIS grade is E (suppl. Figure 1,  
27 footnote)<sup>17</sup>. NLI refers to the most caudal segment of the cord with intact sensation and  
28 antigravity muscle function strength, provided that there is normal (intact) sensory and  
29 motor function rostrally (suppl. Figure 1, footnote)<sup>17</sup>. SCIM is disability scale developed  
30 specifically for patients with spinal cord lesions in order to make the functional assessments  
31 of patients with paraplegia or tetraplegia more sensitive to changes<sup>18</sup>. The SCIM includes  
32 the following areas of function: self-care (subscore (0-20), respiration and sphincter  
33 management (0-40) and mobility (0-40). Each area is scored according to its proportional  
34 weight in these patients' general activity<sup>18</sup>. The final score ranges from 0 to 100 (suppl.  
35  
36  
37  
38  
39  
40  
41  
42  
43  
44  
45  
46  
47  
48  
49  
50  
51  
52  
53  
54  
55  
56  
57  
58  
59  
60

1  
2  
3  
4  
5  
6  
7  
8  
9  
10  
11  
12  
13  
14  
15  
16  
17  
18  
19  
20  
21  
22  
23  
24  
25  
26  
27  
28  
29  
30  
31  
32  
33  
34  
35  
36  
37  
38  
39  
40  
41  
42  
43  
44  
45  
46  
47  
48  
49  
50  
51  
52  
53  
54  
55  
56  
57  
58  
59  
60

Figure 2-4). EQ-5D essentially consists of 2 pages<sup>19</sup> (suppl. Figure 5, 6): the EQ-5D descriptive system and the EQ visual analogue scale (EQ VAS). The descriptive system comprises five dimensions: mobility, self-care, usual activities, pain/discomfort and anxiety/depression. Each dimension has 5 levels: no problems, slight problems, moderate problems, severe problems and extreme problems. The patient is asked to indicate his/her health state by ticking the box next to the most appropriate statement in each of the five dimensions<sup>19</sup>. This decision results in a 1-digit number that expresses the level selected for that dimension. The digits for the five dimensions can be combined into a 5-digit number that describes the patient's health state and can be converted to efficacy score with calibration scale (ranges -0.111 to 1.000)<sup>19</sup>. The EQ VAS records the patient's self-rated health on a vertical visual analogue scale, where the endpoints are labelled 'The best health you can imagine' and 'The worst health you can imagine'. The VAS can be used as a quantitative measure of health outcome that reflect the patient's own judgement<sup>19</sup>.

Each group will include 44 patients (88 patients in total). Our protocol was approved by PMDA and this trial will be funded by the Center for Clinical Trials, Japan Medical Association.

### *Inclusion*

Inclusion criteria are as follows. [1] Patients with cervical SCI (severity of AIS B/C) within 48 h of injury. [2] Patients reassessed for neurological status at 48 h after injury, and those whose palsy is AIS B/C will be enrolled. [3] Patients with neurological level of injury between C4 and C7. [4] Patients with age of 16 to 85 years. [5] Patients who agree to participate in the current trial and from whom informed consent was obtained orally and in writing. [6] Patients who can be followed up for 12 months after SCI.

### *Exclusion*

Exclusion criteria are as follows. [1] Patients with neurological recovery to AIS D at neurological reassessment 48 h after SCI, because only AIS B/C patients will be included to

1  
2  
3  
4  
5  
6  
7  
8  
9  
10  
11  
12  
13  
14  
15  
16  
17  
18  
19  
20  
21  
22  
23  
24  
25  
26  
27  
28  
29  
30  
31  
32  
33  
34  
35  
36  
37  
38  
39  
40  
41  
42  
43  
44  
45  
46  
47  
48  
49  
50  
51  
52  
53  
54  
55  
56  
57  
58  
59  
60

standardize the severity of paresis in order to stratify the patients at the initiation of drug administration. [2] Allergy to G-CSF. [3] Hematological malignancy, [4] within 6 months after invasive coronary intervention, [5] splenomegaly, or [6] pregnancy, [7] consciousness impairment, [8] neurological disorders that can affect neurological evaluation in the present trial, [9] fracture of extremities that can affect the neurological evaluation and [10] massive dose administration of MPSS. Exclusion criteria 2 - 6 are set for safety, criteria 1, 7 - 9 are set to maintain homogeneity of the patient population enrolled, criteria 7-9 are set for maintenance of accuracy of functional assessment, criteria 7 is set to obtain patients' own informed consent upon participation to the trial and criteria 10 is set to omit the possible interference of MPSS on outcome assessment.

### *Concealment*

Patients will be administered drug or placebo and be evaluated in a double-blinded manner. An evaluator blinded to the treatment will take charge of patient evaluation including clinical findings and paresis, without laboratory data because G-CSF induces an apparent increase of white blood cell count that makes it easy to distinguish G-CSF and placebo treatment. Therefore, a non-blinded evaluator for laboratory data will be assigned to evaluate laboratory data alone. From a safety point-of view, the dose of G-CSF will be modulated according to excessive increase of white blood cell count. Therefore, a non-blinded evaluator will instruct the pharmacy to modulate the dose of G-CSF based on white blood cell count.

### *Sample Size Calculation*

The target sample size for this randomized trial is 88. This number is based on the results of previous clinical trials<sup>16</sup>. The estimated group difference ( $\pm$  standard deviation) of change in ASIA motor scores from baseline to 3 months is 13.9 ( $\pm$  21.9). A sample size of 44 patients in each group will provide 80% power to detect a difference of the change in ASIA motor scores between the G-CSF and the placebo treatments, using a mixed-effects models for repeated measures (MMRM) at a two-sided 5% level of significance. A

1  
2  
3  
4  
5 common correlation of 0.25 at each time point is assumed. A dropout rate of 10% is  
6 allowed. Thus, the total sample size of 88 patients is required for the trial.  
7  
8  
9

### 10 *Statistical analyses*

11 The analyses of the primary and secondary end points will be performed as  
12 intention-to-treat analyses in a full analysis set, which includes all patients who: (1) took at  
13 least one course of treatment during the study; (2) do not present any serious violation of  
14 the study protocol; and (3) have data collected after commencement of treatment. For the  
15 baseline characteristics, summary statistics will comprise frequencies and proportions for  
16 categorical variables, and means and SDs for continuous variables. The patient  
17 characteristics will be compared using a chi-square test for categorical variables, and a *t* test  
18 or Wilcoxon rank sum test for continuous variables. Missing data including loss to  
19 follow-up and missing measurement will be supplemented with MMRM.  
20  
21  
22  
23  
24  
25  
26  
27

28 For the primary analysis, aimed at comparing treatment effects, a change in ASIA motor  
29 score from baseline to 3 months and its 95% confidence interval (CI) will be estimated  
30 using the MMRM. To test for significant association of the primary endpoint, a mixed  
31 effects model for repeated measures with an unstructured covariance matrix will be applied  
32 to adjust for age (<65 years or ≥65 years) and AIS at 48 h after the injury (B or C).  
33  
34  
35  
36

37 For the secondary analysis, the change in ASIA motor score will be compared using a  
38 Student *t* test and the 95% CI will be estimated. The same method will be applied to change  
39 in sensory score, SCIM, and EQ-5D. A chi-squared test will be applied to the frequencies of  
40 the responder in AIS and of the improvement in NLI. The frequency of AIS will be  
41 summarized. The frequency of AEs will be compared using a Fisher exact test.  
42  
43  
44

45 All comparisons are planned and all *p* values will be two sided.  $p < 0.05$  will be  
46 considered significant. All statistical analyses will be performed using SAS software  
47 (version 9.4; SAS Institute, Cary, NC, USA). The statistical analysis plan will be developed  
48 by the principal investigator and the biostatistician before completion of patient recruitment  
49 and fixing of data.  
50  
51  
52  
53  
54  
55  
56  
57  
58  
59  
60



### *Data Monitoring Committee*

The data monitoring committee consists of three clinical trial specialists, including a biostatistician, who are independent from the current study. The committee will meet at least 2 times per year and all the data obtained by the current trial will be checked by the committee<sup>20</sup>.

### *Adverse Events*

As for safety evaluation, adverse events will be collected as follows. “Adverse events” refers to any untoward symptom or disease or signs of such (including clinical laboratory data abnormalities) in a clinical investigation subject after informed consent and does not necessarily have a causal relationship with the investigational product (G-CSF).

Increases in white blood counts will be considered an adverse event only when the count exceeds 50,000/ $\mu$ L from the perspective of a pharmacological effect of G-CSF, and any values below this will not be handled as an adverse event. Anaphylaxis and adult respiratory distress syndrome are the most representative G-CSF-related severe adverse events to be paid full attention.

All adverse events will code terminology used by the investigators according to the ICH International Medical Dictionary for Regulatory Activities Japanese version (MedDRA/J).

## **Ethics and Dissemination**

### *Ethics*

The study was approved by the Institutional Review Board (IRB) of each institutions involved to the present trial and will be conducted according to the principles of the World Medical Association (WMA) Declaration of Helsinki—Ethical Principles for Medical Research Involving Human Subjects with the amendments made in Seoul, South Korea, October 2008, with a Note of Clarification on Paragraph 29 added by the WMA General Assembly, Washington 2002; Note of Clarification on Paragraph 30 added by the WMA General Assembly, Tokyo 2004, and in accordance with the Japanese Medical Research Involving Human Subjects Act (WMO) and other guidelines, regulations and Acts.

### *Patient informed consent*

The principal investigator will try to prepare the informed consent form and other explanatory materials in as simple language as possible in order to obtain informed consent from the patient and the patient's legal representative. In case that trial participants cannot sign the informed consent form due to upper extremity palsy caused by SCI, allograph by patients' representative will be allowed.

### *Public Disclosure and Publication Policy*

Results of the clinical study will be submitted to the head of the respective clinical study site as a report after conclusion of the clinical study by the sponsor-investigator (includes study coordinating investigator). Even if the results are not favorable despite conducting the clinical study properly, the data will be published as a paper. Other sponsor-investigators (including the clinical study coordinating investigator), if they plan to publicize the data from this study in a specialized academic society conference or other external site, must first obtain permission from the other principal investigators and investigational product provider. In publicizing the results, the confidentiality of the subjects will be maintained and proofread in advance by the other sponsor-investigators (includes coordinating investigator) and investigational product provider.

### **Discussion**

The current trial is a confirmative trial to elucidate the therapeutic efficacy of G-CSF for SCI. If the current trial can successfully show significant improvement of motor paralysis of SCI by G-CSF, we will move forward to drug approval application to the Ministry for Health and Labor, Japan. The entire protocol of the current trial was approved beforehand for the initiation of the current trial by the Japanese Pharmaceutical and Medical Device Agency (PMDA). The PMDA will also permit a drug approval application if significant efficacy of G-CSF for SCI is proven.

The current trial is an important milestone for SCI clinics and research to explore

1  
2  
3  
4  
5 G-CSF for SCI.  
6  
7

8  
9 *Trial Status*

10 The present trial is now on-going.

11  
12 *Trial Sites*

13  
14 Nineteen major hospitals in Japan constituting the G-SPIRIT study group as follows:  
15 Tohoku University Hospital, Miyagi; Niigata University, Niigata; Dokkyo University  
16 Hospital, Tochigi; Tsukuba University Hospital, Ibaraki; Tsukuba Medical Center, Ibaraki;  
17 Chiba University Hospital, Chiba; Funabashi Municipal Medical Center, Chiba; Kimitsu  
18 Chuo Hospital, Chiba; Chiba Rosai Hospital, Chiba; Tokai University Hospital, Kanagawa;  
19 Hamamatsu University Hospital, Shizuoka; Gifu University Hospital, Gifu; Chubu Rosai  
20 Hospital, Aichi; Mie University Hospital, Mie; Kanazawa Medical Collage, Ishikawa;  
21 Kobe Red Cross Hospital, Hyogo; Hiroshima University Hospital, Hiroshima; Yamaguchi  
22 University Hospital, Yamaguchi; and Nagasaki Rosai Hospital, Nagasaki.  
23  
24  
25  
26  
27  
28  
29  
30

31 **Funding Statement**

32 This trial is supported by Center for Clinical trials, Japan Medical Association, Japan.  
33 (<http://www.jmacct.med.or.jp/>, tel: 81-3-5319-3781)  
34  
35  
36  
37

38 **Competing Interests**

39 No authors have any competing interests to declare.  
40  
41  
42

43 **Contributorship Statement**

44 Koda M, Hanaoka H, Sato T, Fujii Y, Hanawa M, Takahashi S, Furuya T, Ijima Y, Saito J,  
45 Kitamura M, Ohtori S, Matsumoto Y, Abe T, Watanabe K, Hirano T, Ohashi M, Shoji H,  
46 Mizouchi T, Takahashi I, Kawahara N, Kawaguchi M, Orita Y, Sasamoto T, Yoshioka M,  
47 Fujii M, Yonezawa K, Soma D, Taneichi H, Takeuchi D, Inami S, Moridaira H, Ueda H,  
48 Asano F, Shibao Y, Aita I, Takeuchi Y, Mimura M, Shimbo J, Someya Y, Ikenoue S,  
49 Sameda H, Takase K, Ikeda Y, Nakajima F, Hashimoto M, Ozawa T, Hasue F, Fujiyoshi T,  
50 Kamiya K, Watanabe M, Katoh H, Matsuyama Y, Yamamoto Y, Togawa D, Hasegawa T,  
51  
52  
53  
54  
55  
56  
57

1  
2  
3  
4  
5 Kobayashi S, Yoshida G, Oe S, Banno T, Arima H, Akeda K, Kawamoto E, Imai H,  
6 Sakakibara T, Sudo A, Ito Y, Kikuchi T, Osaki S, Tanaka N, Nakanishi K, Kamei I N,  
7 Kotaka S, Baba H, Okudaira T, Konishi H, Yamaguchi T, Ito K, Katayama Y, Matsumoto  
8 T, Matsumoto T, Idota M, Kanno H, Aizawa T, Hashimoto K, Eto T, Sugaya T, Matsuda  
9 M, Fushimi K, Nozawa S, Iwai C, Taguchi T, Kanchiku T, Suzuki H, Nishida N, Funaba M  
10 and Yamazaki M substantially contributed to the conception or design of the present trial  
11 protocol, to the acquisition and analyses of data for the present manuscript, to drafting the  
12 manuscript and revising the present manuscript critically for important intellectual content  
13 and final approval of the version of the present manuscript to be published to agreement to  
14 be accountable for all aspects of the present manuscript in ensuring that questions related to  
15 the accuracy or integrity of any part of the present manuscript are appropriately  
16 investigated and resolved, consequently fulfill the ICMJE criteria for authorship.  
17  
18  
19  
20  
21  
22  
23  
24  
25  
26  
27

## 28 References

- 29 1. Oyinbo CA. Secondary injury mechanisms in traumatic spinal cord injury: a nugget  
30 of multiply cascade. *Acta Neurobiol Exp* 2011;71:281-299.
- 31 2. Karsy M, Hawryluk G. Pharmacologic Management of Acute Spinal Cord Injury.  
32 *Neurosurg Clin N Am* 2017;28:49-62. doi: 10.1016/j.nec.2016.07.002.
- 33 3. Bracken MB, Shepard MJ, Collins WF, et al. A randomized controlled trial of  
34 methylprednisolone or naloxone in the treatment of acute spinal cord injury: results  
35 of the second national acute spinal cord injury study. *N Engl J Med* 1990;322:  
36 1405-1411.
- 37 4. Matsumoto T, Tamaki T, Kawakami M, et al. Early complications of high-dose  
38 methyl-prednisolone sodium succinate treatment in the follow-up of acute cervical  
39 spinal cord injury. *Spine* 2001;26: 426-430.
- 40 5. Hurlbert RJ, Hadley, Walters BC, et al. Pharmacological Therapy for Acute Spinal  
41 cord Injury. *Neurosurgery* 2013;72: 93-105.
- 42 6. Nicola NA, Metcalf D, Matsumoto M, Johnson GR. Purification of a factor inducing  
43 differentiation in murine myelomonocytic leukemia cells. Identification as  
44  
45  
46  
47  
48  
49  
50  
51  
52  
53  
54  
55  
56  
57  
58  
59  
60

- granulocyte colony-stimulating factor. *J Biol Chem* 1983;258: 9017-9023.
7. Roberts AW: G-CSF: a key regulator of neutrophil production, but that's no all! *Growth Factors* 2005;23: 33-41.
  8. Kawada H, Takizawa S, Takanashi T, et al. Administration of hematopoietic cytokines in the subacute phase after cerebral infarction is effective for functional recovery facilitating proliferation of intrinsic neural stem/progenitor cells and transition of bone marrow-derived neuronal cells. *Circulation* 2006;113: 701-710.
  9. Schneider A, Kruger C, Steigleder T, et al. The hematopoietic factor G-CSF is a neuronal ligand that counteracts programmed cell death and drives neurogenesis. *J Clin Invest* 2005;115: 2083-2098.
  10. Shyu WC, Lin SZ, Lee CC, Liu DD, Li H. Granulocyte colony-stimulating factor for acute ischemic stroke: a randomized controlled trial. *CMAJ* 2006;174: 927-933.
  11. Koda M, Nishio Y, Kamada T, et al. Granulocyte colony-stimulating factor (G-CSF) mobilizes bone marrow-derived cells into injured spinal cord and promotes functional recovery after compression-induced spinal cord injury in mice. *Brain Res* 2007;1149: 223-231.
  12. Nishio Y, Koda M, Kamada T, et al. Granulocyte colony-stimulating factor (G-CSF) attenuates neuronal death and promotes functional recovery after spinal cord injury in mice. *J Neuropathol Exp Neurol* 2007;66: 724-731.
  13. Kadota R, Koda M, Kawabe J, et al. Granulocyte colony-stimulating factor (G-CSF) protects oligodendrocyte and promotes hindlimb functional recovery after spinal cord injury in rats. *PLoS One* 2012;7:e50391.
  14. Kawabe J, Koda M, Hashimoto M, et al. Granulocyte colony-stimulating factor (G-CSF) exerts neuroprotective effects via promoting angiogenesis after spinal cord injury in rats. *J Neurosurg Spine* 2011;15: 414-421.
  15. Takahashi H, Yamazaki M, Okawa A, et al. Neuroprotective therapy using granulocyte colony-stimulating factor for acute spinal cord injury: a phase I/IIa clinical trial. *Eur Spine J* 2012;21:2580-2587.
  16. Inada T, Takahashi H, Yamazaki M, et al. A multicenter prospective

1  
2  
3  
4  
5 non-randomized controlled clinical trial to prove neurotherapeutic effects of  
6 granulocyte colony-stimulating factor (G-CSF) for acute spinal cord injury:  
7  
8 Analyses of follow-up cases after at least one year. *Spine* 2014;39:213-219.  
9  
10

### 11 12 13 Figure legends

14 Figure: Schematic diagram showing trial timeline.

15  
16 Cervical SCI with severity of AIS B/C within 48 hours after injury is recruited. Patients are  
17 randomly assigned to G-CSF and placebo groups. The G-CSF group is administered G-CSF  
18 in normal saline via intravenous infusion for 5 consecutive days. The placebo group is  
19 similarly administered a placebo.  
20  
21  
22

23  
24  
25 Suppl. Figure 1: ASIA score chart.  
26  
27

28  
29 Suppl. Figure 2-4: Spinal cord independence measure chart (Japanese version) for spinal  
30 cord injury-specific ADL evaluation.  
31  
32

33  
34 Suppl. Figure 5, 6: Euro-QOL 5-dimension chart (Japanese version) for QOL evaluation.  
35  
36  
37  
38  
39  
40  
41  
42  
43  
44  
45  
46  
47  
48  
49  
50  
51  
52  
53  
54  
55  
56  
57

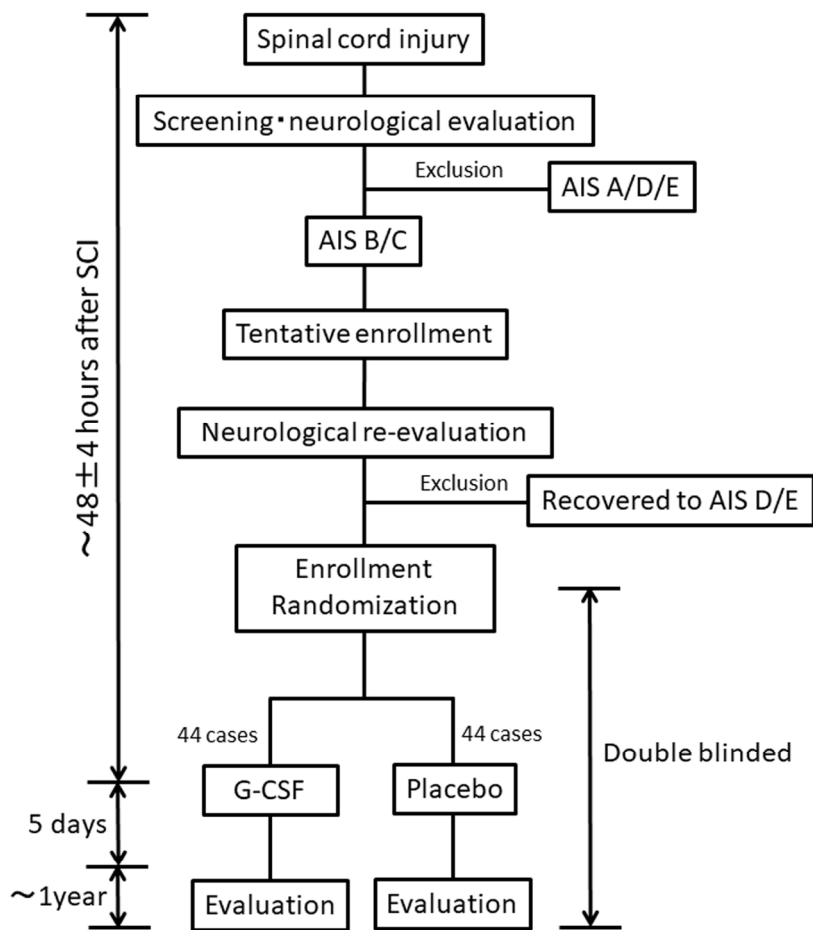

Schematic diagram showing trial timeline.

190x254mm (300 x 300 DPI)

1  
2  
3  
4  
5  
6  
7  
8  
9  
10  
11  
12  
13  
14  
15  
16  
17  
18  
19  
20  
21  
22  
23  
24  
25  
26  
27  
28  
29  
30  
31  
32  
33  
34  
35  
36  
37  
38  
39  
40  
41  
42  
43  
44  
45  
46  
47  
48  
49  
50  
51  
52  
53  
54  
55  
56  
57  
58  
59  
60

INTERNATIONAL STANDARDS FOR NEUROLOGICAL CLASSIFICATION OF SPINAL CORD INJURY (ISNCSCI) **ASIA** **ISICOS**

Patient Name \_\_\_\_\_ Date/Time of Exam \_\_\_\_\_  
 Examiner Name \_\_\_\_\_ Signature \_\_\_\_\_

**RIGHT**

**MOTOR KEY MUSCLES**

Elbow flexors C5  
 Wrist extensors C6  
 Elbow extensors C7  
 Finger flexors C8  
 Finger abductors (little finger) T1

**UER**  
(Upper Extremity Right)

**LER**  
(Lower Extremity Right)

Hip flexors L2  
 Knee extensors L3  
 Ankle dorsiflexors L4  
 Long toe extensors L5  
 Ankle plantar flexors S1

(VAC) Voluntary anal contraction (Yes/No)

**RIGHT TOTALS**  
(MAXIMUM) (50) (56) (56)

Key Sensory Points

**SENSORY KEY SENSORY POINTS**  
Light Touch (LTR) Pin Prick (PPR)

C2  
C3  
C4  
C5  
C6  
C7  
C8  
T1  
T2  
T3  
T4  
T5  
T6  
T7  
T8  
T9  
T10  
T11  
T12  
L1  
L2  
L3  
L4  
L5  
S1  
S2  
S3  
S4-5

**SENSORY KEY SENSORY POINTS**  
Light Touch (LTL) Pin Prick (PPL)

C2  
C3  
C4  
C5  
C6  
C7  
C8  
T1  
T2  
T3  
T4  
T5  
T6  
T7  
T8  
T9  
T10  
T11  
T12  
L1  
L2  
L3  
L4  
L5  
S1  
S2  
S3  
S4-5

**LEFT TOTALS**  
(MAXIMUM) (56) (56) (50)

**LEFT**

**MOTOR KEY MUSCLES**

Elbow flexors C5  
 Wrist extensors C6  
 Elbow extensors C7  
 Finger flexors C8  
 Finger abductors (little finger) T1

**UEL**  
(Upper Extremity Left)

**LEL**  
(Lower Extremity Left)

Hip flexors L2  
 Knee extensors L3  
 Ankle dorsiflexors L4  
 Long toe extensors L5  
 Ankle plantar flexors S1

(DAP) Deep anal pressure (Yes/No)

**LEFT TOTALS**  
(MAXIMUM) (56) (56) (50)

**MOTOR SUBSCORES**  
 UER  + UEL  = UEMS TOTAL   
 LER  + LEL  = LEMS TOTAL   
 LTR  + LTL  = LT TOTAL   
 PPR  + PPL  = PP TOTAL

**NEUROLOGICAL LEVELS**  
 1. SENSORY  R  L  
 2. MOTOR  R  L  
 3. NEUROLOGICAL LEVEL OF INJURY (NL)   
 4. COMPLETE OR INCOMPLETE?   
 5. ASIA IMPAIRMENT SCALE (AIS)

**ZONE OF PARTIAL PRESERVATION**  
 (In complete injuries only)  
 Most caudal level with any innervation

SENSORY  R  L  
 MOTOR  R  L

This form may be copied freely but should not be altered without permission from the American Spinal Injury Association. REV 02/13

274x206mm (300 x 300 DPI)



## セルフケア

- (1) 食事（切る、容器を開ける、飲み物を注ぐ、食べ物を口に運ぶ、飲み物の入ったコップをもつ）
0. 静脈栄養または胃瘻が必要である、あるいは経口摂取において全介助を要する。
  1. 食べたり飲んだりすること、または補助器具の装着に部分介助を要する。
  2. 食べることは自立、補助器具を必要とするか、または食べ物を切ったり注いだりすること、容器の開閉にのみ解介助を要する。
  3. 食べることも飲むことも自立、介助や補助器具を必要としない。
- (2) 入浴（頭と体を石鹸でこすって洗い、乾かす、蛇口の開け閉め） A—上半身、B—下半身
- A.
0. 全介助を要する。
  1. 部分介助を要する。
  2. 補助器具、または特定の環境（例えば、手すりや椅子）が整っていれば、自立して体を洗う。
  3. 自立して体を洗う。（通常、健常者なら用いることのない）補助器具や特定の環境設定は不要
- B.
0. 全介助を要する。
  1. 部分介助を要する。
  2. 補助器具、または特定の環境が整っていれば、自立して体を洗う。
  3. 自立して体を洗う、補助器具や特定の環境設定は不要
- (3) 更衣（衣服、靴、常用している装具の着脱） A—上半身、B—下半身
- A.
0. 全介助を要する。
  1. ボタン、ファスナー、ひものない衣服で部分介助を要する。
  2. ボタン、ファスナー、ひものない衣服であれば自立、補助器具と特定の環境設定、またはそのどちらかが必要。
  3. ボタン、ファスナー、ひものない衣服であれば自立、補助器具も特定の環境設定も不要、ボタン、ファスナー、ひもの扱いにだけ介助、補助器具、または特定の環境設定が必要。
  - 4.（衣類の種類を問わず）自立して着替える、補助器具も特定の環境設定も不要。
- B.
0. 全介助を要する。
  1. ボタン、ファスナー、ひものない衣服で部分介助を要する。
  2. ボタン、ファスナー、ひものない衣服であれば自立、補助器具と特定の環境設定、またはそのどちらかが必要。
  3. ボタン、ファスナー、ひものない衣服であれば自立、補助器具も特定の環境設定も不要、ボタン、ファスナー、ひもの扱いにだけ介助、補助器具、または特定の環境設定が必要。
  - 4.（衣類の種類を問わず）自立して着替える、補助器具も特定の環境設定も不要。
- (4) 整容（手洗い、洗顔、歯磨き、整髪、髭剃り、化粧）
0. 全介助を要する。
  1. 部分介助を要する。
  2. 補助器具があれば自立して整容動作をおこなう。
  3. 補助器具を用いずに自立して整容動作をおこなう。

小計 (0-20)

## 呼吸と排泄管理

- (5) 呼吸
0. 気管チューブと持続的補助換気または間欠的補助換気が必要。
  1. 気管チューブを装着して自己呼吸、酸素を必要としたり、咳嗽時または気管チューブの管理に多大な介助を必要とする。
  2. 気管チューブを装着して自己呼吸、咳嗽時または気管チューブの管理に少しか介助を必要としない。
  3. 気管チューブなしで自己呼吸、酸素、咳嗽時の多大な介助、マスク（例：終末呼吸陽圧 PEEP）、または間欠的補助換気 (BiPAP) を必要とする。
  4. 気管チューブなしで自己呼吸、介助または咳嗽刺激を少しか必要としない。
  5. 介助も器具もなしで自己呼吸。

190x254mm (300 x 300 DPI)

## (6) 排尿管理

0. 留置カテーテル
3. 残尿量 > 100cc. 不定期導尿または介助による間欠的導尿.
6. 残尿量 > 100cc または間欠的の自己導尿. 集尿器<sup>1</sup>をあてがう際の介助は必要.
9. 間欠的の自己導尿. 集尿器を使用する. 器具をあてがう際の介助は不要.
11. 間欠的の自己導尿. 導尿と導尿の間には失禁なし. 集尿器は使用しない.
13. 残尿量 < 100cc. 集尿器のみ必要. 集尿器の取扱いには介助不要.
15. 残尿量 < 100cc. 失禁なし. 集尿器を使用しない.

## (7) 排便管理

0. 排便が不規則またはごく低頻度 (3日に1回未満).
5. 規則的ながら. (座薬を挿入するなど)に介助を要する. 失敗はまれ (月2回未満).
8. 規則的な排便で. 介助を要しない. 失敗はまれ (月2回未満).
10. 規則的な排便で. 介助を要しない. 失敗はなし.

## (8) トイレの使用 (会陰部の清潔. 使用前後での衣服の扱い. ナプキンまたはおむつの使用)

0. 全介助を要する.
1. 部分介助を要する. 自分でお尻を拭けない.
2. 部分介助を要する. 自立してお尻を拭ける.
4. 自立してトイレを使用するも. 補助器具または特別な環境 (例: 手すり) が整っている必要あり.
5. 自立してトイレを使用. 補助器具も特別な環境が整っている必要もない.

小計 (0-40)

**移動 (室内とトイレ)**

## (9) ベッド上での姿勢変換と褥瘡予防動作

0. ベッド上で上半身の向きを変えること. 下半身の向きを変えること. 起き上がること. および車椅子上で  
のフッシュアップのすべての動作に介助が必要. 補助器具の要否は問わないが. 電動器具は用いない.
2. 介助なくできる動作が1つある.
4. 介助なくできる動作が2つまたは3つある.
6. ベッド上動作と除圧動作はすべて自立しておこなう.

## (10) 移乗: ベッド-車椅子 (車いすのブレーキ操作. フットレストの跳ね上げ. アームレストの脱着. 乗り移り. 足の持ち上げ)

0. 全介助を要する.
1. 部分介助. 監視. および補助器具 (例: スライディングボード) のすべて. もしくは. そのいずれかが必要.
2. 自立 (または車椅子を必要としない).

(11) 移乗: 車椅子-トイレ. 浴槽 (トイレ用車椅子<sup>1</sup>を使用している場合は. それへのからの乗り移り. 通常の車椅子を使用している場合は. 車椅子のブレーキ操作. フットレストの跳ね上げ. アームレストの脱着. 乗り移り. 足の持ち上げ)

0. 全介助を要する.
1. 部分介助. 監視. および補助器具 (例: 手すり) のすべて. もしくは. そのいずれかが必要.
2. 自立 (または車椅子を必要としない).

**移動 (屋内と屋外. 平らな所で)**

## (12) 屋内の移動

0. 全介助を要する.
1. 電動車椅子を必要とするか. または手動車椅子を操作するのに部分介助を要する.
2. 手動車椅子で自立して移動する.
3. 歩行時に監視を必要とする (器具の要否は問わない).
4. 歩行器または松葉杖で歩行 (大振り・小振り歩行).
5. 松葉杖または T 字杖 2 本で歩行 (交互歩行).
6. T 字杖 1 本で歩行.
7. 下肢装具のみを必要とする.
8. 歩行補助具なしで歩行.

190x254mm (300 x 300 DPI)

1  
2  
3  
4  
5  
6  
7  
8  
9  
10  
11  
12  
13  
14  
15  
16  
17  
18  
19  
20  
21  
22  
23  
24  
25  
26  
27  
28  
29  
30  
31  
32  
33  
34  
35  
36  
37  
38  
39  
40  
41  
42  
43  
44  
45  
46  
47  
48  
49  
50  
51  
52  
53  
54  
55  
56  
57  
58  
59  
60

- (13) まとまった距離の移動 (10~100m)
  - 0. 全介助を要する。
  - 1. 電動車椅子を必要とするか、または手動車椅子を操作するのに部分介助を要する。
  - 2. 手動車椅子で自立して移動する。
  - 3. 歩行時に監視を必要とする(器具の要否は問わない)。
  - 4. 歩行器または松葉杖で歩行(大振り・小振り歩行)。
  - 5. 松葉杖または T 字杖 2 本で歩行(交互歩行)。
  - 6. T 字杖 1 本で歩行。
  - 7. 下肢装具のみを必要とする。
  - 8. 歩行補助具なしで歩行。
  
- (14) 屋外の移動 (100m 以上)
  - 0. 全介助を要する。
  - 1. 電動車椅子を使用するか、または手動車椅子を操作するのに部分介助を要する。
  - 2. 手動車椅子で自立して移動する。
  - 3. 歩行時に監視を必要とする(器具の要否は問わない)。
  - 4. 歩行器または松葉杖で歩行(大振り・小振り歩行)。
  - 5. 松葉杖または T 字杖 2 本で歩行(交互歩行)。
  - 6. T 字杖 1 本で歩行。
  - 7. 下肢装具のみを必要とする。
  - 8. 歩行補助具なしで歩行。
  
- (15) 階段昇降
  - 0. 階段の上り下り不能。
  - 1. 人に支えられるか、またはその監視下で少なくとも 3 段は上り下りできる。
  - 2. 手すりにつかまったり、松葉杖や T 字杖を用いて少なくとも 3 段は上り下りできる。
  - 3. 支えも監視もなく少なくとも 3 段は上り下りできる。
  
- (16) 移乗: 車椅子一車 (車に近づく、車椅子のブレーキ操作、アームレストおよびフットレストの取り外し、車へのからの乗り移り、車椅子の積み降ろし)
  - 0. 全介助を要する。
  - 1. 部分介助、監視、および補助器具のすべて、もしくはいずれかを必要とする。
  - 2. 自立して移乗する。補助器具を必要としない(または車椅子を必要としない)。
  
- (17) 移乗: 床一車椅子
  - 0. 介助を要する。
  - 1. 補助器具の有無にかかわらず、自立して移乗する(または車椅子を必要としない)。







小計(0-40)

SCIM 合計スコア(0-100)

訳者注

- 1. 夜間のみ BPAP を使用している場合も 0 点とする
  - 2. 原書では external drainage instrument、体外からあててるのみが在宅医療器具集積器のこと指す。例えば、コンドーム型集積器、しびんなどが含まれる。尿導管や膀胱に挿入するカテーテルは含まれない
  - 3. ベッド横やひもなどを使ってもよい
  - 4. 原書では toilet wheelchair、便器や浴槽に移乗することなく、乗車したまま洋式便器が使用でき、シャワー浴にも使える車椅子のこと。介助型と自立型がある。わが国ではトイレ兼用シャワーキヤリー(介助型)が用いられることがある
- SCIM (Version 3.0) 日本語版 朝川博之・黒川真希子・出田良輔・星宇明光訳  
 [ Translated by permission from Dr. Amiram Catz, Loewenstein Rehabilitation Hospital, Raanana, Israel ]  
 [ Reprinted by permission from Macmillan Publishers Ltd. Spinal cord 40: 396-407, copyright 2002 ]

190x254mm (300 x 300 DPI)

以下のそれぞれの項目の一つの四角に（このように☐）印をつけて、あなた自身の今日の健康状態を最も良く表している記述を示して下さい。

**移動の程度**

歩き回るのに問題はない

歩き回るのにいくらか問題がある

ベッド（床）に寝たきりである

**身の回りの管理**

身の回りの管理に問題はない

洗面や着替えを自分でするのにいくらか問題がある

洗面や着替えを自分でできない

**ふだんの活動（例：仕事、勉強、家事、家族・余暇活動）**

ふだんの活動を行うのに問題はない

ふだんの活動を行うのにいくらか問題がある

ふだんの活動を行うことができない

**痛み／不快感**

痛みや不快感はない

中程度の痛みや不快感がある

ひどい痛みや不快感がある

**不安／ふさぎ込み**

不安でもふさぎ込んでもいない

中程度に不安あるいはふさぎ込んでいる

ひどく不安あるいはふさぎ込んでいる

1  
2  
3  
4  
5  
6  
7  
8  
9  
10  
11  
12  
13  
14  
15  
16  
17  
18  
19  
20  
21  
22  
23  
24  
25  
26  
27  
28  
29  
30  
31  
32  
33  
34  
35  
36  
37  
38  
39  
40  
41  
42  
43  
44  
45  
46  
47  
48  
49  
50  
51  
52  
53  
54  
55  
56  
57  
58  
59  
60

健康状態がどのくらい良いか悪いかを表わしてもらうために、( 温度計に似たような ) 目盛を描きました。目盛には、あなたの想像できる最も良い状態として 100、あなたの想像できる最も悪い状態として 0 が付けられています。

あなたの今日の健康状態がどのくらい良いか悪いかを、あなたの考えでこの目盛上に示して下さい。下の「あなたの今日の健康状態」と書かれた四角から、あなたの現在の健康状態のよし悪しを示す目盛上の点まで、線を引いて下さい。

**あなたの  
今日の  
健康状態**

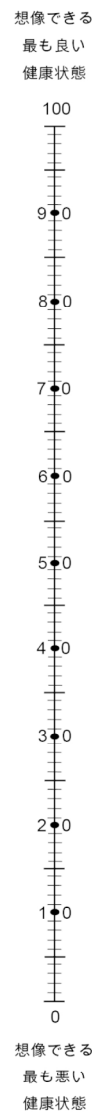

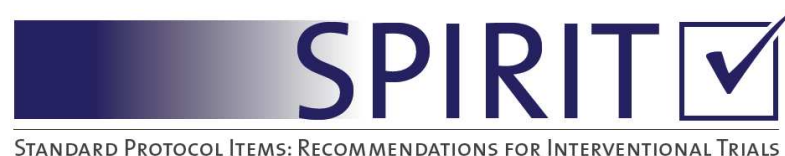

SPIRIT 2013 Checklist: Recommended items to address in a clinical trial protocol and related documents\*

| Section/item                      | Item No | Description                                                                                                                                                                                                                                                                              | Addressed on page number |
|-----------------------------------|---------|------------------------------------------------------------------------------------------------------------------------------------------------------------------------------------------------------------------------------------------------------------------------------------------|--------------------------|
| <b>Administrative information</b> |         |                                                                                                                                                                                                                                                                                          |                          |
| Title                             | 1       | Descriptive title identifying the study design, population, interventions, and, if applicable, trial acronym                                                                                                                                                                             | <u>1</u>                 |
| Trial registration                | 2a      | Trial identifier and registry name. If not yet registered, name of intended registry                                                                                                                                                                                                     | <u>3</u>                 |
|                                   | 2b      | All items from the World Health Organization Trial Registration Data Set                                                                                                                                                                                                                 | <u>3</u>                 |
| Protocol version                  | 3       | Date and version identifier                                                                                                                                                                                                                                                              | <u>3</u>                 |
| Funding                           | 4       | Sources and types of financial, material, and other support                                                                                                                                                                                                                              | <u>15</u>                |
| Roles and responsibilities        | 5a      | Names, affiliations, and roles of protocol contributors                                                                                                                                                                                                                                  | <u>1-2</u>               |
|                                   | 5b      | Name and contact information for the trial sponsor                                                                                                                                                                                                                                       | <u>15</u>                |
|                                   | 5c      | Role of study sponsor and funders, if any, in study design; collection, management, analysis, and interpretation of data; writing of the report; and the decision to submit the report for publication, including whether they will have ultimate authority over any of these activities | <u>15</u>                |
|                                   | 5d      | Composition, roles, and responsibilities of the coordinating centre, steering committee, endpoint adjudication committee, data management team, and other individuals or groups overseeing the trial, if applicable (see Item 21a for data monitoring committee)                         | <u>13</u>                |

## Introduction

|                          |    |                                                                                                                                                                                                           |            |
|--------------------------|----|-----------------------------------------------------------------------------------------------------------------------------------------------------------------------------------------------------------|------------|
| Background and rationale | 6a | Description of research question and justification for undertaking the trial, including summary of relevant studies (published and unpublished) examining benefits and harms for each intervention        | <u>4-6</u> |
|                          | 6b | Explanation for choice of comparators                                                                                                                                                                     | <u>6</u>   |
| Objectives               | 7  | Specific objectives or hypotheses                                                                                                                                                                         | <u>6</u>   |
| Trial design             | 8  | Description of trial design including type of trial (eg, parallel group, crossover, factorial, single group), allocation ratio, and framework (eg, superiority, equivalence, noninferiority, exploratory) | <u>6-8</u> |

## Methods: Participants, interventions, and outcomes

|                      |     |                                                                                                                                                                                                                                                                                                                                                                                |               |
|----------------------|-----|--------------------------------------------------------------------------------------------------------------------------------------------------------------------------------------------------------------------------------------------------------------------------------------------------------------------------------------------------------------------------------|---------------|
| Study setting        | 9   | Description of study settings (eg, community clinic, academic hospital) and list of countries where data will be collected. Reference to where list of study sites can be obtained                                                                                                                                                                                             | <u>15</u>     |
| Eligibility criteria | 10  | Inclusion and exclusion criteria for participants. If applicable, eligibility criteria for study centres and individuals who will perform the interventions (eg, surgeons, psychotherapists)                                                                                                                                                                                   | <u>11</u>     |
| Interventions        | 11a | Interventions for each group with sufficient detail to allow replication, including how and when they will be administered                                                                                                                                                                                                                                                     | <u>6-8</u>    |
|                      | 11b | Criteria for discontinuing or modifying allocated interventions for a given trial participant (eg, drug dose change in response to harms, participant request, or improving/worsening disease)                                                                                                                                                                                 | <u>13</u>     |
|                      | 11c | Strategies to improve adherence to intervention protocols, and any procedures for monitoring adherence (eg, drug tablet return, laboratory tests)                                                                                                                                                                                                                              | <u>7</u>      |
|                      | 11d | Relevant concomitant care and interventions that are permitted or prohibited during the trial                                                                                                                                                                                                                                                                                  | <u>11</u>     |
| Outcomes             | 12  | Primary, secondary, and other outcomes, including the specific measurement variable (eg, systolic blood pressure), analysis metric (eg, change from baseline, final value, time to event), method of aggregation (eg, median, proportion), and time point for each outcome. Explanation of the clinical relevance of chosen efficacy and harm outcomes is strongly recommended | <u>8-10</u>   |
| Participant timeline | 13  | Time schedule of enrolment, interventions (including any run-ins and washouts), assessments, and visits for participants. A schematic diagram is highly recommended (see Figure)                                                                                                                                                                                               | <u>Figure</u> |

1  
2  
3 Sample size 14 Estimated number of participants needed to achieve study objectives and how it was determined, including 11-12  
4 clinical and statistical assumptions supporting any sample size calculations

5  
6 Recruitment 15 Strategies for achieving adequate participant enrolment to reach target sample size 15  
7

8 **Methods: Assignment of interventions (for controlled trials)**  
9

10 Allocation:

11  
12 Sequence generation 16a Method of generating the allocation sequence (eg, computer-generated random numbers), and list of any 6  
13 factors for stratification. To reduce predictability of a random sequence, details of any planned restriction  
14 (eg, blocking) should be provided in a separate document that is unavailable to those who enrol participants  
15 or assign interventions  
16

17 Allocation concealment mechanism 16b Mechanism of implementing the allocation sequence (eg, central telephone; sequentially numbered, 6  
18 opaque, sealed envelopes), describing any steps to conceal the sequence until interventions are assigned  
19  
20

21 Implementation 16c Who will generate the allocation sequence, who will enrol participants, and who will assign participants to 6-7  
22 interventions  
23

24 Blinding (masking) 17a Who will be blinded after assignment to interventions (eg, trial participants, care providers, outcome 7, 11  
25 assessors, data analysts), and how  
26

27 17b If blinded, circumstances under which unblinding is permissible, and procedure for revealing a participant's 11  
28 allocated intervention during the trial  
29  
30

31 **Methods: Data collection, management, and analysis**  
32

33 Data collection methods 18a Plans for assessment and collection of outcome, baseline, and other trial data, including any related 8-10  
34 processes to promote data quality (eg, duplicate measurements, training of assessors) and a description of  
35 study instruments (eg, questionnaires, laboratory tests) along with their reliability and validity, if known.  
36 Reference to where data collection forms can be found, if not in the protocol  
37

38 18b Plans to promote participant retention and complete follow-up, including list of any outcome data to be 12-13  
39 collected for participants who discontinue or deviate from intervention protocols  
40  
41  
42  
43  
44



|    |                                 |     |                                                                                                                                                                                                                                                                                                                                       |                             |
|----|---------------------------------|-----|---------------------------------------------------------------------------------------------------------------------------------------------------------------------------------------------------------------------------------------------------------------------------------------------------------------------------------------|-----------------------------|
| 1  |                                 |     |                                                                                                                                                                                                                                                                                                                                       |                             |
| 2  |                                 |     |                                                                                                                                                                                                                                                                                                                                       |                             |
| 3  | Data management                 | 19  | Plans for data entry, coding, security, and storage, including any related processes to promote data quality (eg, double data entry; range checks for data values). Reference to where details of data management procedures can be found, if not in the protocol                                                                     | <u>13</u>                   |
| 4  |                                 |     |                                                                                                                                                                                                                                                                                                                                       |                             |
| 5  |                                 |     |                                                                                                                                                                                                                                                                                                                                       |                             |
| 6  |                                 |     |                                                                                                                                                                                                                                                                                                                                       |                             |
| 7  | Statistical methods             | 20a | Statistical methods for analysing primary and secondary outcomes. Reference to where other details of the statistical analysis plan can be found, if not in the protocol                                                                                                                                                              | <u>12-13</u>                |
| 8  |                                 |     |                                                                                                                                                                                                                                                                                                                                       |                             |
| 9  |                                 |     |                                                                                                                                                                                                                                                                                                                                       |                             |
| 10 |                                 | 20b | Methods for any additional analyses (eg, subgroup and adjusted analyses)                                                                                                                                                                                                                                                              | <u>12-13</u>                |
| 11 |                                 |     |                                                                                                                                                                                                                                                                                                                                       |                             |
| 12 |                                 | 20c | Definition of analysis population relating to protocol non-adherence (eg, as randomised analysis), and any statistical methods to handle missing data (eg, multiple imputation)                                                                                                                                                       | <u>12-13</u>                |
| 13 |                                 |     |                                                                                                                                                                                                                                                                                                                                       |                             |
| 14 |                                 |     |                                                                                                                                                                                                                                                                                                                                       |                             |
| 15 | <b>Methods: Monitoring</b>      |     |                                                                                                                                                                                                                                                                                                                                       |                             |
| 16 |                                 |     |                                                                                                                                                                                                                                                                                                                                       |                             |
| 17 | Data monitoring                 | 21a | Composition of data monitoring committee (DMC); summary of its role and reporting structure; statement of whether it is independent from the sponsor and competing interests; and reference to where further details about its charter can be found, if not in the protocol. Alternatively, an explanation of why a DMC is not needed | <u>13</u>                   |
| 18 |                                 |     |                                                                                                                                                                                                                                                                                                                                       |                             |
| 19 |                                 |     |                                                                                                                                                                                                                                                                                                                                       |                             |
| 20 |                                 |     |                                                                                                                                                                                                                                                                                                                                       |                             |
| 21 |                                 |     |                                                                                                                                                                                                                                                                                                                                       |                             |
| 22 |                                 | 21b | Description of any interim analyses and stopping guidelines, including who will have access to these interim results and make the final decision to terminate the trial                                                                                                                                                               | <u>N/A</u>                  |
| 23 |                                 |     |                                                                                                                                                                                                                                                                                                                                       |                             |
| 24 |                                 |     |                                                                                                                                                                                                                                                                                                                                       |                             |
| 25 | Harms                           | 22  | Plans for collecting, assessing, reporting, and managing solicited and spontaneously reported adverse events and other unintended effects of trial interventions or trial conduct                                                                                                                                                     | <u>13</u>                   |
| 26 |                                 |     |                                                                                                                                                                                                                                                                                                                                       |                             |
| 27 |                                 |     |                                                                                                                                                                                                                                                                                                                                       |                             |
| 28 | Auditing                        | 23  | Frequency and procedures for auditing trial conduct, if any, and whether the process will be independent from investigators and the sponsor                                                                                                                                                                                           | <u>Not in the protocol</u>  |
| 29 |                                 |     |                                                                                                                                                                                                                                                                                                                                       |                             |
| 30 |                                 |     |                                                                                                                                                                                                                                                                                                                                       |                             |
| 31 |                                 |     |                                                                                                                                                                                                                                                                                                                                       |                             |
| 32 | <b>Ethics and dissemination</b> |     |                                                                                                                                                                                                                                                                                                                                       |                             |
| 33 |                                 |     |                                                                                                                                                                                                                                                                                                                                       |                             |
| 34 | Research ethics approval        | 24  | Plans for seeking research ethics committee/institutional review board (REC/IRB) approval                                                                                                                                                                                                                                             | <u>13-14</u>                |
| 35 |                                 |     |                                                                                                                                                                                                                                                                                                                                       |                             |
| 36 |                                 |     |                                                                                                                                                                                                                                                                                                                                       |                             |
| 37 | Protocol amendments             | 25  | Plans for communicating important protocol modifications (eg, changes to eligibility criteria, outcomes, analyses) to relevant parties (eg, investigators, REC/IRBs, trial participants, trial registries, journals, regulators)                                                                                                      | <u>Patient consent form</u> |
| 38 |                                 |     |                                                                                                                                                                                                                                                                                                                                       |                             |
| 39 |                                 |     |                                                                                                                                                                                                                                                                                                                                       |                             |
| 40 |                                 |     |                                                                                                                                                                                                                                                                                                                                       |                             |
| 41 |                                 |     |                                                                                                                                                                                                                                                                                                                                       |                             |
| 42 |                                 |     |                                                                                                                                                                                                                                                                                                                                       |                             |
| 43 |                                 |     |                                                                                                                                                                                                                                                                                                                                       |                             |
| 44 |                                 |     |                                                                                                                                                                                                                                                                                                                                       |                             |
| 45 |                                 |     |                                                                                                                                                                                                                                                                                                                                       |                             |
| 46 |                                 |     |                                                                                                                                                                                                                                                                                                                                       |                             |
| 47 |                                 |     |                                                                                                                                                                                                                                                                                                                                       |                             |

|    |                               |     |                                                                                                                                                                                                                                                                                     |                             |
|----|-------------------------------|-----|-------------------------------------------------------------------------------------------------------------------------------------------------------------------------------------------------------------------------------------------------------------------------------------|-----------------------------|
| 1  |                               |     |                                                                                                                                                                                                                                                                                     |                             |
| 2  |                               |     |                                                                                                                                                                                                                                                                                     |                             |
| 3  | Consent or assent             | 26a | Who will obtain informed consent or assent from potential trial participants or authorised surrogates, and how (see Item 32)                                                                                                                                                        | <u>13</u>                   |
| 4  |                               |     |                                                                                                                                                                                                                                                                                     |                             |
| 5  |                               |     |                                                                                                                                                                                                                                                                                     |                             |
| 6  |                               | 26b | Additional consent provisions for collection and use of participant data and biological specimens in ancillary studies, if applicable                                                                                                                                               | <u>N/A</u>                  |
| 7  |                               |     |                                                                                                                                                                                                                                                                                     |                             |
| 8  | Confidentiality               | 27  | How personal information about potential and enrolled participants will be collected, shared, and maintained in order to protect confidentiality before, during, and after the trial                                                                                                | <u>14</u>                   |
| 9  |                               |     |                                                                                                                                                                                                                                                                                     |                             |
| 10 |                               |     |                                                                                                                                                                                                                                                                                     |                             |
| 11 | Declaration of interests      | 28  | Financial and other competing interests for principal investigators for the overall trial and each study site                                                                                                                                                                       | <u>15</u>                   |
| 12 |                               |     |                                                                                                                                                                                                                                                                                     |                             |
| 13 |                               |     |                                                                                                                                                                                                                                                                                     |                             |
| 14 | Access to data                | 29  | Statement of who will have access to the final trial dataset, and disclosure of contractual agreements that limit such access for investigators                                                                                                                                     | <u>14</u>                   |
| 15 |                               |     |                                                                                                                                                                                                                                                                                     |                             |
| 16 |                               |     |                                                                                                                                                                                                                                                                                     |                             |
| 17 | Ancillary and post-trial care | 30  | Provisions, if any, for ancillary and post-trial care, and for compensation to those who suffer harm from trial participation                                                                                                                                                       | <u>Patient consent form</u> |
| 18 |                               |     |                                                                                                                                                                                                                                                                                     |                             |
| 19 | Dissemination policy          | 31a | Plans for investigators and sponsor to communicate trial results to participants, healthcare professionals, the public, and other relevant groups (eg, via publication, reporting in results databases, or other data sharing arrangements), including any publication restrictions | <u>14</u>                   |
| 20 |                               |     |                                                                                                                                                                                                                                                                                     |                             |
| 21 |                               |     |                                                                                                                                                                                                                                                                                     |                             |
| 22 |                               |     |                                                                                                                                                                                                                                                                                     |                             |
| 23 |                               |     |                                                                                                                                                                                                                                                                                     |                             |
| 24 |                               |     |                                                                                                                                                                                                                                                                                     |                             |
| 25 |                               | 31b | Authorship eligibility guidelines and any intended use of professional writers                                                                                                                                                                                                      | <u>14-15</u>                |
| 26 |                               |     |                                                                                                                                                                                                                                                                                     |                             |
| 27 |                               | 31c | Plans, if any, for granting public access to the full protocol, participant-level dataset, and statistical code                                                                                                                                                                     | <u>N/A</u>                  |
| 28 |                               |     |                                                                                                                                                                                                                                                                                     |                             |
| 29 | <b>Appendices</b>             |     |                                                                                                                                                                                                                                                                                     |                             |
| 30 |                               |     |                                                                                                                                                                                                                                                                                     |                             |
| 31 | Informed consent materials    | 32  | Model consent form and other related documentation given to participants and authorised surrogates                                                                                                                                                                                  | <u>Patient consent form</u> |
| 32 |                               |     |                                                                                                                                                                                                                                                                                     |                             |
| 33 |                               |     |                                                                                                                                                                                                                                                                                     |                             |
| 34 | Biological specimens          | 33  | Plans for collection, laboratory evaluation, and storage of biological specimens for genetic or molecular analysis in the current trial and for future use in ancillary studies, if applicable                                                                                      | <u>N/A</u>                  |
| 35 |                               |     |                                                                                                                                                                                                                                                                                     |                             |
| 36 |                               |     |                                                                                                                                                                                                                                                                                     |                             |

37 \*It is strongly recommended that this checklist be read in conjunction with the SPIRIT 2013 Explanation & Elaboration for important clarification on the items.  
 38 Amendments to the protocol should be tracked and dated. The SPIRIT checklist is copyrighted by the SPIRIT Group under the Creative Commons  
 39 "[Attribution-NonCommercial-NoDerivs 3.0 Unported](https://creativecommons.org/licenses/by-nc-nd/3.0/)" license.  
 40
